# Supplementary material for: Metatranscriptomic Analysis of the Chicken Gut Resistome Response to In-Feed Antibiotics and Natural Feed Additives
Source: Front Microbiol. 2022 Apr 14;13:833790. doi: 10.3389/fmicb.2022.833790 (PMC9048739; doi:10.3389/fmicb.2022.833790)
Supplement: Supplementary file 1 [file Data_Sheet_1.xlsx]

## Sheet: Title_page
				Metatranscriptomic analysis of the chicken gut resistome response to in-feed antibiotics and natural feed additives
				Raju Koorakula, Matteo Schiavinato, Mahdi Ghanbari, Gertrude Wegl, Nikolaus Grabner, Andreas Koestelbauer, Viviana Klose, Juliane C. Dohm, Konrad J. Domig
								Correspondence:
								Corresponding Author
								raju.koorakula@ffoqsi.at

## Sheet: Contents
					Supporting Information-Tables
						Contents
	1. ARG_NORMALIZED_COUNTS. Normalized read counts obtained for each ARG (rows) in each sample (columns 6 on). Indicated are the gene ID, type, class, mechanism and group as annotated in the MegaRes2 database.
	2. ARG_RICHNESS. Richness measured for each replicate of each sample in each timepoint and under each treatment. Indicated are sample name (<timepoint>_<treatment>_<replicate>) and measured richness.
	3. ARG_DIVERSITY. Shannon diversity measured for each replicate of each sample in each timepoint and under each treatment. Indicated are sample name (<timepoint>_<treatment>_<replicate>) and measured diversity.
	4. ARG_NMDS_PERMANOVA. Results of the permanova test performed on the identified ARGs between each group of samples, where a group is defined by timepoint+treatment (e.g. “D21_AB”). Indicated are the two groups compared, the resulting p-value, and whether the p-value is lower than 0.05 (which we used as a significance threshold).
	5. ARG_DISSIMILARITY. Bray-Curtis dissimilarity measured for each replicate of each sample in each timepoint and under each treatment. 1st column: sample name (<timepoint>_<treatment>_<replicate>). 2nd and 3rd column: X and Y parameters of the Bray-Curtis dissimilarity.
	6. ARG_UNIQUE_CLASS. Gene IDs of the ARGs identified uniquely at each timepoint (1st column) in each treatment (columns 2 on).
	7. ARG_RELATIVE_ABUNDANCE_CLASS. Relative abundance of the top 10 most abundant ARG drug classes (1st column) in each sample (other columns).
	8. ARG_RELATIVE_ABUNDANCE_MECHANISM. Relative abundance of the top 10 most abundant ARG drug mechanisms (1st column) in each sample (other columns).
	9. ARG_DEGS. Differentially expressed antibiotic resistance genes (ARGs) identified in all comparisons performed. Indicated are: The IDs of the ARGs according to the MetaRes2 database (column “Genes”); the timepoint, treatment and comparison in which the gene was identified; its log2FoldChange and the associated adjusted p-value; the direction of the expression change (i.e. “up” or “down”); the t…

## Sheet: NORMALIZED_ARG_COUNTS
ID	TYPE	CLASS	MECHANISM	GROUP	D3_CON_R1	D3_PFA_R1	D3_AGP_R1	D3_AGP+PFA_R1	D3_AB_R1	D3_AB+PFA_R1	D14_CON_R1	D14_CON_R2	D14_CON_R3	D14_CON_R4	D14_PFA_R1	D14_PFA_R2	D14_PFA_R3	D14_PFA_R4	D14_AGP_R1	D14_AGP_R2	D14_AGP_R3	D14_AGP_R4	D14_AGP+PFA_R1	D14_AGP+PFA_R2	D14_AGP+PFA_R3	D14_AGP+PFA_R4	D14_AB_R1	D14_AB_R2	D14_AB_R3	D14_AB_R4	D14_AB+PFA_R1	D14_AB+PFA_R2	D14_AB+PFA_R3	D14_AB+PFA_R4	D21_CON_R1	D21_CON_R2	D21_CON_R3	D21_CON_R4	D21_PFA_R1	D21_PFA_R2	D21_PFA_R3	D21_PFA_R4	D21_AGP_R1	D21_AGP_R2	D21_AGP_R3	D21_AGP_R4	D21_AGP+PFA_R1	D21_AGP+PFA_R2	D21_AGP+PFA_R3
MEG_988|Drugs|Aminoglycosides|Aminoglycoside_O-nucleotidyltransferases|ANT6	Drugs	Aminoglycosides	Aminoglycoside_O-nucleotidyltransferases	ANT6	5.19899	0	27.0654	18.4731	20.9055	34.8442	233.907	241.334	754.267	558.261	230.168	178.174	239.336	465.05	146.308	394.302	626.401	351.002	178.546	200.193	257.904	229.861	418.772	552.467	282.191	248.381	77.7559	321.785	613.043	800.357	241.939	580.383	139.46	558.552	268.246	475.033	236.049	179.828	253.194	242.197	561.125	527.704	370.14	198.102	261.234
MEG_1003|Drugs|Aminoglycosides|Aminoglycoside_O-nucleotidyltransferases|ANT9	Drugs	Aminoglycosides	Aminoglycoside_O-nucleotidyltransferases	ANT9	1.11407	0	0	0	0	0	321.623	79.4755	311.861	404.611	386.605	140.547	164.336	120.913	118.797	191.054	659.002	127.907	137.735	182.251	234.17	146.619	118.231	301.732	160.928	177.751	102.193	216.918	141.908	482.19	82.3624	464.306	171.11	736.641	194.027	203.586	249.46	161.063	214.976	147.554	376.191	158.311	113.686	275.207	173.927
MEG_1040|Drugs|Aminoglycosides|Aminoglycoside_O-phosphotransferases|APH3-DPRIME	Drugs	Aminoglycosides	Aminoglycoside_O-phosphotransferases	APH3-DPRIME	1.6711	0	0	3.50352	0	0	138.218	135.69	219.995	238.157	37.1859	60.867	31.985	107.892	58.7732	106.706	156.018	180.459	104.577	109.539	137.654	142.835	128.159	108.368	145.629	114.185	736.459	101.994	221.377	132.405	132.981	150.899	116.711	242.849	93.3028	208.011	80.4711	62.5488	144.512	73.0316	213.385	197.889	204.458	91.3403	85.9323
MEG_7218|Drugs|Tetracyclines|Tetracycline_resistance_ribosomal_protection_proteins|TETW	Drugs	Tetracyclines	Tetracycline_resistance_ribosomal_protection_proteins	TETW	0	0	0	0	0	0	10.6322	27.138	0	0	0	0	17.6469	0	0	0	0	0	0	0	15.8223	24.5942	22.5631	0	7.93307	0	0	0	0	0	19.7327	0	0	0	27.5667	0	19.6707	0	0	26.8279	0	0	0	0	10.3119
MEG_987|Drugs|Aminoglycosides|Aminoglycoside_O-nucleotidyltransferases|ANT6	Drugs	Aminoglycosides	Aminoglycoside_O-nucleotidyltransferases	ANT6	0	0	0	0	0	0	54.0468	103.706	77.3607	122.92	21.7986	42.0535	0	48.3652	0	43.6985	0	81.3055	56.1144	67.0456	115.503	55.8098	112.816	76.4954	124.096	70.6297	1355.17	47.4059	68.1159	57.3095	175.02	104.469	57.3665	105.234	44.5309	271.447	33.9767	20.3284	66.8814	58.8724	105.902	79.1557	227.372	66.4293	76.3079
MEG_2799|Drugs|MLS|23S_rRNA_methyltransferases|ERMB	Drugs	MLS	23S_rRNA_methyltransferases	ERMB	0	0	0	0	0	0	13.2902	0	0	7.68249	0	18.8134	0	0	0	34.5523	0	34.7036	16.5793	19.8304	0	0	0	0	9.06637	22.3661	0	24.4212	73.7922	0	0	0	16.8143	0	0	0	31.2943	0	0	0	0	0	0	0	15.8115
MEG_2796|Drugs|MLS|23S_rRNA_methyltransferases|ERMB	Drugs	MLS	23S_rRNA_methyltransferases	ERMB	0	0	0	0	0	0	7.0881	0	0	0	0	0	0	0	0	0	0	7.93225	0	12.276	0	0	0	0	3.96654	0	2.77699	7.18271	0	0	0	0	0	0	0	0	0	0	0	0	0	0	4.40643	0	0
MEG_3610|Drugs|MLS|Lincosamide_nucleotidyltransferases|LNUC	Drugs	MLS	Lincosamide_nucleotidyltransferases	LNUC	12.0691	2.93546	9.02179	5.09603	15.3787	46.3269	156.824	93.0444	299.773	359.796	229.527	540.056	197.424	394.363	67.5267	233.736	589.143	82.2971	100.751	269.127	245.246	198.645	253.61	395.226	285.024	211.889	80.5329	163.766	170.29	304.333	252.235	557.167	130.558	488.396	168.581	259.645	421.132	192.338	296.189	88.6812	325.61	1432.72	290.824	701.067	127.18
MEG_3641|Drugs|MLS|MLS_resistance_ABC_efflux_pumps|LSA	Drugs	MLS	MLS_resistance_ABC_efflux_pumps	LSA	12.2548	0	10.955	5.41453	24.7501	23.7574	82.3992	43.6146	72.5257	0	37.1859	315.401	0	273.45	0	26.4223	0	0	0	0	0	0	156.137	0	146.762	0	0	0	0	81.0238	107.243	0	107.809	67.458	68.9169	116.545	131.436	241.595	139.734	78.9933	72.7091	2036.94	357.802	386.714	59.8089
MEG_1038|Drugs|Aminoglycosides|Aminoglycoside_O-phosphotransferases|APH3-DPRIME	Drugs	Aminoglycosides	Aminoglycoside_O-phosphotransferases	APH3-DPRIME	0	0	0	2.22951	0	0	95.6894	98.8597	164.392	148.528	24.3632	43.1602	24.2644	72.5478	66.2762	54.8771	95.4738	117.001	61.2157	78.3773	121.041	77.5662	92.0576	112.618	92.3636	108.299	507.635	77.5733	184.48	59.2857	73.783	150.899	87.0388	169.994	71.0374	134.248	50.965	35.1837	95.5448	46.2036	145.418	147.757	124.261	85.4091	59.1214
MEG_2806|Drugs|MLS|23S_rRNA_methyltransferases|ERMB	Drugs	MLS	23S_rRNA_methyltransferases	ERMB	0	0	0	0	0	0	10.6322	0	0	0	0	14.3867	0	0	11.2544	23.3736	9.31452	29.7459	14.6663	8.49874	3.16446	0	5.41515	0	0	20.0117	0	11.4923	0	0	0	0	9.89077	0	0	0	18.7766	0	0	0	0	0	0	0	8.93696
MEG_3609|Drugs|MLS|Lincosamide_nucleotidyltransferases|LNUB	Drugs	MLS	Lincosamide_nucleotidyltransferases	LNUB	2.97085	0	0	0	5.28644	5.14743	14.1762	11.6306	33.8453	0	5.12909	55.3336	0	61.3866	0	0	0	0	0	0	0	0	27.0758	0	39.0987	0	0	0	0	29.6429	22.3065	58.0383	9.89077	0	9.54233	22.1289	23.2472	45.3479	20.3033	17.8853	14.2257	337.731	80.197	80.6642	9.62442
MEG_3271|Drugs|Multi-drug_resistance|Multi-drug_RND_efflux_pumps|HNS	Drugs	Multi-drug_resistance	Multi-drug_RND_efflux_pumps	HNS	95.2528	2.93546	133.394	233.78	101.403	142.94	14.1762	0	99.1185	17.9258	313.515	12.1734	7.72051	44.6448	150.059	24.3898	218.891	105.102	38.8975	61.3798	94.1427	51.0802	3.6101	36.1228	8.49972	64.7439	2.77699	24.4212	133.394	51.3809	0	0	64.29	24.2849	9.54233	0	27.7178	24.2377	64.4928	76.0124	39.5158	47.4934	18.507	32.0284	17.8739
MEG_7170|Drugs|Tetracyclines|Tetracycline_resistance_ribosomal_protection_proteins|TETO	Drugs	Tetracyclines	Tetracycline_resistance_ribosomal_protection_proteins	TETO	0	8.31714	0	0	0	0	23.0363	31.0148	0	0	0	0	28.6762	0	0	0	0	0	0	0	0	0	0	0	0	0	0	0	0	0	22.3065	0	0	0	34.9886	0	0	17.2009	0	0	0	0	15.8632	0	0
MEG_6993|Drugs|Tetracyclines|Tetracycline_resistance_ribosomal_protection_proteins|TET40	Drugs	Tetracyclines	Tetracycline_resistance_ribosomal_protection_proteins	TET40	16.3397	0	14.8215	0	0	0	100.119	46.5222	195.819	74.264	46.8029	53.1202	74.9992	109.752	118.797	60.9746	95.4738	38.6697	30.6078	167.142	110.756	64.3232	66.7869	259.234	184.727	188.346	13.885	28.7308	90.8212	173.905	16.3009	0	55.3883	78.2512	57.254	146.05	68.8475	47.6935	42.9952	174.382	67.9672	124.011	73.1467	183.867	68.7459
MEG_7214|Drugs|Tetracyclines|Tetracycline_resistance_ribosomal_protection_proteins|TETW	Drugs	Tetracyclines	Tetracycline_resistance_ribosomal_protection_proteins	TETW	0	8.80638	0	0	0	0	21.2643	36.8301	0	0	0	0	20.9557	0	0	0	0	0	0	0	10.2845	0	17.148	0	10.1997	0	0	17.2385	0	0	31.7438	0	0	0	43.4706	0	0	0	0	0	0	0	14.9819	0	19.2488
MEG_7222|Drugs|Tetracyclines|Tetracycline_resistance_ribosomal_protection_proteins|TETW	Drugs	Tetracyclines	Tetracycline_resistance_ribosomal_protection_proteins	TETW	0	0	0	0	0	0	11.5182	18.415	0	29.4495	20.5163	0	15.441	0	0	12.1949	0	17.8476	15.9416	0	22.1512	25.5401	26.1732	0	13.5995	22.3661	0	0	0	0	0	0	15.8252	0	0	0	13.4119	0	19.109	18.6305	0	0	14.9819	0	18.5614
MEG_2795|Drugs|MLS|23S_rRNA_methyltransferases|ERMB	Drugs	MLS	23S_rRNA_methyltransferases	ERMB	0	0	0	0	0	0	6.20209	0	0	0	0	0	0	0	0	0	0	8.92378	0	0	0	0	0	0	3.39989	0	0	0	0	0	0	0	0	0	0	0	8.04711	0	0	0	0	0	0	0	3.43729
MEG_2805|Drugs|MLS|23S_rRNA_methyltransferases|ERMB	Drugs	MLS	23S_rRNA_methyltransferases	ERMB	0	0	0	0	0	0	7.97412	0	0	0	0	12.1734	4.41172	0	0	15.2436	0	26.7713	7.0143	11.3317	0	0	0	0	4.53318	22.3661	7.77559	0	0	0	0	0	7.91262	0	7.42181	5.90103	9.83536	0	0	0	9.4838	0	5.28772	0	11.6868
MEG_1004|Drugs|Aminoglycosides|Aminoglycoside_O-nucleotidyltransferases|ANT9	Drugs	Aminoglycosides	Aminoglycoside_O-nucleotidyltransferases	ANT9	5.57034	0	0	0	4.32527	17.4221	8.86013	17.4458	60.4381	0	8.33476	163.787	0	53.9458	0	8.12995	0	0	0	0	0	0	23.4657	0	29.4657	0	0	0	0	23.7143	11.1532	0	30.6614	24.2849	0	17.7031	23.2472	32.8381	21.4976	18.6305	0	667.546	23.7947	93.7128	7.56205
MEG_145|Drugs|Aminoglycosides|Aminoglycoside_N-acetyltransferases|AAC6-PRIME	Drugs	Aminoglycosides	Aminoglycoside_N-acetyltransferases	AAC6-PRIME	28.5944	0	719.81	2.54801	0	0	5.31608	0	21.7577	0	0	0	0	0	0	0	0	0	5.10131	0	0	25.5401	0	10.6244	5.66648	0	0	0	0	9.88095	0	0	0	0	0	0	0	0	0	0	0	0	0	0	0
MEG_3648|Drugs|Multi-drug_resistance|Multi-drug_ABC_efflux_pumps|LSAE	Drugs	Multi-drug_resistance	Multi-drug_ABC_efflux_pumps	LSAE	2.41381	0	0	2.22951	5.76702	7.52317	15.9482	16.4766	31.4278	0	7.69363	86.3204	0	48.3652	0	0	0	0	0	0	0	0	36.101	0	41.9319	0	0	20.1116	0	23.7143	21.4485	0	26.7051	24.2849	13.7834	11.8021	32.1884	56.294	20.3033	20.1209	20.5482	379.947	102.229	103.203	11.6868
MEG_6994|Drugs|Tetracyclines|Tetracycline_resistance_ribosomal_protection_proteins|TET40	Drugs	Tetracyclines	Tetracycline_resistance_ribosomal_protection_proteins	TET40	23.3954	0	28.9986	4.14052	0	0	177.203	117.275	304.608	175.417	101.299	83.0004	106.984	208.342	202.58	109.754	137.389	65.441	38.2598	293.679	185.121	110.674	112.816	501.47	322.989	334.314	17.2174	60.3348	170.29	272.714	40.3232	116.077	112.755	105.234	85.881	241.942	114.448	89.1321	70.4643	272.005	124.87	182.058	120.736	345.195	119.618
MEG_7055|Drugs|Tetracyclines|Tetracycline_resistance_MFS_efflux_pumps|TETBP	Drugs	Tetracyclines	Tetracycline_resistance_MFS_efflux_pumps	TETBP	0	0	0	0	0	0	25.6944	0	43.5154	33.2908	0	0	0	0	0	0	0	0	0	0	0	40.675	56.8591	212.487	39.0987	0	37.2117	221.227	0	0	35.1756	0	50.4429	0	0	0	16.9883	21.1102	0	26.8279	25.2901	176.781	0	0	39.8726
MEG_2807|Drugs|MLS|23S_rRNA_methyltransferases|ERMB	Drugs	MLS	23S_rRNA_methyltransferases	ERMB	0	0	0	0	0	0	5.31608	0	0	0	0	0	0	0	0	11.1787	0	13.8814	6.37664	13.2203	0	0	0	0	0	18.8346	0	0	0	0	0	0	0	13.4916	0	0	8.04711	0	0	0	0	0	6.169	0	9.62442
MEG_6992|Drugs|Tetracyclines|Tetracycline_resistance_ribosomal_protection_proteins|TET40	Drugs	Tetracyclines	Tetracycline_resistance_ribosomal_protection_proteins	TET40	15.9683	0	9.6662	0	0	0	101.005	62.0296	164.392	98.5919	48.0852	42.0535	88.2344	119.053	110.043	74.1858	100.131	38.6697	24.2312	191.694	106.801	57.7017	71.2995	303.857	206.26	220.129	12.2188	28.7308	76.6304	158.095	16.3009	0	54.3992	72.8546	58.3143	144.575	59.0121	57.8577	39.4122	192.267	50.5803	89.7097	71.3842	179.122	61.8713
MEG_7219|Drugs|Tetracyclines|Tetracycline_resistance_ribosomal_protection_proteins|TETW	Drugs	Tetracyclines	Tetracycline_resistance_ribosomal_protection_proteins	TETW	0	0	0	0	0	0	15.0622	16.4766	0	20.4866	15.3873	0	16.5439	0	0	0	0	19.8306	14.0286	0	22.9423	17.9727	22.5631	0	13.5995	17.6574	0	0	0	0	20.5906	0	16.8143	0	19.0847	22.1289	0	12.5098	0	20.1209	22.1289	0	0	0	26.1234
MEG_2578|Drugs|Trimethoprim|Dihydrofolate_reductase|DFRF	Drugs	Trimethoprim	Dihydrofolate_reductase	DFRF	0	0	0	0	0	0	65.565	72.691	19.3402	92.1898	19.2341	76.3604	28.6762	195.321	28.7614	171.745	211.905	84.2801	24.2312	26.4405	97.3072	43.5128	142.599	19.1238	12.4663	71.8069	25.5484	189.624	31.2198	106.714	52.3344	104.469	128.58	134.916	136.773	112.12	94.7771	9.38233	20.3033	67.0698	109.064	52.7704	76.6719	80.6642	94.8693
MEG_7169|Drugs|Tetracyclines|Tetracycline_resistance_ribosomal_protection_proteins|TETO	Drugs	Tetracyclines	Tetracycline_resistance_ribosomal_protection_proteins	TETO	0	5.87092	0	0	3.60439	0	14.1762	42.6454	0	0	0	0	16.5439	0	0	0	0	0	0	0	0	0	0	0	0	0	0	0	0	0	21.4485	0	0	0	26.5065	0	0	17.9828	0	0	0	0	0	0	19.9363
MEG_7223|Drugs|Tetracyclines|Tetracycline_resistance_ribosomal_protection_proteins|TETW	Drugs	Tetracyclines	Tetracycline_resistance_ribosomal_protection_proteins	TETW	0	0	0	0	0	0	16.8342	30.0456	0	19.2062	0	17.7067	18.7498	0	0	0	0	0	0	0	18.9868	18.9186	16.2455	0	0	0	0	22.9847	0	0	24.0224	0	0	0	32.868	0	0	23.4558	0	17.1401	0	0	12.338	0	17.1865
MEG_6169|Drugs|Nucleosides|Streptothricin_acetyltransferase|SAT	Drugs	Nucleosides	Streptothricin_acetyltransferase	SAT	0	0	0	0	0	0	62.0209	44.5838	58.0206	90.9094	16.0284	30.9868	11.0293	42.7846	21.2584	41.666	34.9294	49.5765	32.5208	57.6026	87.0227	43.5128	65.8843	36.1228	53.8316	70.6297	618.714	44.5328	122.041	27.6667	83.2203	0	52.4211	80.9495	42.4104	224.239	34.8708	29.7107	63.2984	33.5349	96.4186	73.8786	120.736	37.9596	63.2462
MEG_3620|Drugs|MLS|Lincosamide_nucleotidyltransferases|LNUG	Drugs	MLS	Lincosamide_nucleotidyltransferases	LNUG	24.5095	0	94.0844	1.91101	0	0	15.0622	0	0	0	0	8.85337	0	0	0	0	23.2863	0	8.92729	0	16.6134	65.2691	0	19.1238	6.23313	0	0	0	0	17.7857	0	0	0	0	0	0	0	0	0	0	0	29.0237	0	0	0
MEG_3621|Drugs|MLS|Lincosamide_nucleotidyltransferases|LNUP	Drugs	MLS	Lincosamide_nucleotidyltransferases	LNUP	0	0	0	0	0	0	4.43007	84.3215	24.1752	35.8516	0	0	11.0293	0	58.7732	0	0	0	14.6663	22.6633	18.9868	141.889	0	0	131.462	23.5432	158.844	18.675	0	21.7381	0	0	0	0	0	0	0	0	10.7488	0	0	21.1082	0	0	0
MEG_7215|Drugs|Tetracyclines|Tetracycline_resistance_ribosomal_protection_proteins|TETW	Drugs	Tetracyclines	Tetracycline_resistance_ribosomal_protection_proteins	TETW	0	10.5187	0	0	0	0	20.3783	48.4606	0	0	0	0	29.7791	0	25.0099	0	0	0	0	0	11.8667	0	12.6354	0	6.23313	0	0	18.675	0	0	32.6018	0	13.8471	0	54.0732	0	12.5177	17.2009	16.7203	11.9235	0	39.5778	0	0	14.4366
MEG_6166|Drugs|Nucleosides|Streptothricin_acetyltransferase|SAT	Drugs	Nucleosides	Streptothricin_acetyltransferase	SAT	0	0	0	0	0	0	89.4873	56.2143	89.4484	117.798	23.0809	32.0935	12.1322	42.7846	26.2604	53.8609	48.9012	63.458	47.8248	79.3216	75.947	49.1883	83.9348	53.1218	77.6308	71.8069	766.451	48.8424	107.85	41.5	114.106	127.684	74.1808	97.1395	53.013	216.863	34.8708	41.4386	82.4074	40.9871	101.161	52.7704	155.106	33.2147	72.8706
MEG_2789|Drugs|MLS|23S_rRNA_methyltransferases|ERMB	Drugs	MLS	23S_rRNA_methyltransferases	ERMB	0	0	0	0	0	0	5.31608	0	0	0	0	0	0	0	0	12.1949	0	18.8391	9.56495	7.55443	0	0	5.41515	0	5.66648	12.9488	4.44319	12.9289	0	0	0	0	0	0	7.42181	11.8021	0	0	0	0	0	15.8311	7.93158	9.4899	8.2495
MEG_996|Drugs|Aminoglycosides|Aminoglycoside_O-nucleotidyltransferases|ANT6	Drugs	Aminoglycosides	Aminoglycoside_O-nucleotidyltransferases	ANT6	0	0	0	0	0	0	31.8965	31.0148	48.3505	37.132	10.8993	14.3867	0	0	0	30.4873	20.9577	43.6274	0	17.9418	35.6002	24.5942	27.0758	0	36.8321	0	382.115	25.8578	62.4396	0	54.0503	0	44.5085	43.1731	16.9641	84.0897	16.9883	14.8554	44.1895	18.6305	66.3866	71.2401	92.535	24.911	0
MEG_994|Drugs|Aminoglycosides|Aminoglycoside_O-nucleotidyltransferases|ANT6	Drugs	Aminoglycosides	Aminoglycoside_O-nucleotidyltransferases	ANT6	0	0	0	0	0	0	31.8965	32.9532	50.768	44.8145	12.8227	24.3468	0	27.903	0	37.601	37.2581	46.6019	30.6078	29.2734	46.6758	26.486	47.8338	27.6233	54.9648	14.1259	485.974	28.7308	85.1448	51.3809	62.6297	0	42.5303	51.268	33.9283	101.793	24.1413	13.2916	72.8529	26.0827	52.1609	110.818	114.567	33.2147	42.6224
MEG_7221|Drugs|Tetracyclines|Tetracycline_resistance_ribosomal_protection_proteins|TETW	Drugs	Tetracyclines	Tetracycline_resistance_ribosomal_protection_proteins	TETW	0	0	0	0	0	0	13.2902	17.4458	0	0	17.9518	0	23.1615	0	21.2584	14.2274	0	17.8476	16.5793	13.2203	22.9423	21.7564	27.0758	0	15.8661	24.7204	0	0	0	0	18.0168	0	0	0	15.9039	30.9804	0	21.1102	0	17.1401	30.032	0	13.2193	20.166	15.1241
MEG_7210|Drugs|Tetracyclines|Tetracycline_resistance_ribosomal_protection_proteins|TETW	Drugs	Tetracyclines	Tetracycline_resistance_ribosomal_protection_proteins	TETW	0	8.80638	9.6662	0	0	0	23.9224	50.3991	0	0	0	0	33.0879	0	0	0	0	0	0	0	0	0	0	0	8.49972	0	0	0	0	0	32.6018	0	0	0	51.9527	0	0	28.147	0	0	0	0	0	0	0
MEG_7213|Drugs|Tetracyclines|Tetracycline_resistance_ribosomal_protection_proteins|TETW	Drugs	Tetracyclines	Tetracycline_resistance_ribosomal_protection_proteins	TETW	0	8.07252	10.955	0	0	0	11.5182	43.6146	0	19.2062	14.105	0	27.5732	0	21.2584	0	0	0	12.7533	0	17.4045	17.9727	12.6354	0	9.63301	0	0	0	0	0	34.3177	0	15.8252	0	34.9886	28.0299	0	20.3284	0	17.1401	0	0	17.6257	0	10.9993
MEG_1039|Drugs|Aminoglycosides|Aminoglycoside_O-phosphotransferases|APH3-DPRIME	Drugs	Aminoglycosides	Aminoglycoside_O-phosphotransferases	APH3-DPRIME	0	0	0	3.50352	0	0	142.648	122.121	244.17	222.792	44.2384	65.2936	49.6318	87.4294	68.7772	117.884	165.333	194.34	117.968	120.871	149.521	132.43	138.989	133.867	168.294	176.574	855.87	142.218	300.845	154.143	147.566	278.584	123.635	256.34	119.809	255.22	95.6712	74.2768	133.763	93.1525	282.933	158.311	250.285	97.2715	127.867
MEG_2791|Drugs|MLS|23S_rRNA_methyltransferases|ERMB	Drugs	MLS	23S_rRNA_methyltransferases	ERMB	0	0	0	0	0	0	7.97412	0	0	0	0	11.0667	0	0	0	21.3411	0	34.7036	19.7676	20.7747	0	0	0	0	0	30.6062	0	0	0	0	0	0	0	0	0	0	26.8237	0	0	4.47132	0	0	0	0	0
MEG_2793|Drugs|MLS|23S_rRNA_methyltransferases|ERMB	Drugs	MLS	23S_rRNA_methyltransferases	ERMB	0	0	0	0	0	0	8.86013	0	0	0	0	14.3867	0	0	0	36.5848	0	35.6951	16.5793	9.44304	6.32892	0	0	0	0	17.6574	0	15.802	45.4106	0	0	0	11.8689	13.4916	0	0	13.4119	0	0	3.7261	0	0	0	0	10.3119
MEG_1000|Drugs|Aminoglycosides|Aminoglycoside_O-nucleotidyltransferases|ANT6	Drugs	Aminoglycosides	Aminoglycoside_O-nucleotidyltransferases	ANT6	0	0	0	0	0	8.31509	12.4042	0	33.8453	0	7.05249	64.187	5.51465	37.204	0	0	0	0	0	0	0	0	18.0505	0	30.599	0	0	0	0	0	17.1588	0	25.716	29.6815	0	0	12.5177	17.2009	20.3033	11.1783	0	356.2	26.4386	41.5183	11.6868
MEG_2801|Drugs|MLS|23S_rRNA_methyltransferases|ERMB	Drugs	MLS	23S_rRNA_methyltransferases	ERMB	0	0	0	0	0	0	14.1762	0	0	0	0	0	0	0	0	20.3249	0	40.6528	15.9416	0	0	0	0	0	8.49972	0	6.66479	0	0	0	0	0	0	0	0	0	18.7766	0	0	0	0	0	0	0	10.3119
MEG_1018|Drugs|Aminoglycosides|Aminoglycoside_O-phosphotransferases|APH2-DPRIME	Drugs	Aminoglycosides	Aminoglycoside_O-phosphotransferases	APH2-DPRIME	0	0	0	0	0	0	9.74614	0	0	0	0	0	0	0	13.7554	0	0	0	0	12.276	16.6134	0	7.2202	0	0	0	0	0	0	0	0	0	0	0	8.48207	0	0	9.38233	0	0	0	0	14.1006	0	0
MEG_368|Drugs|Aminoglycosides|Aminoglycoside_N-acetyltransferases|AAC6-PRIME	Drugs	Aminoglycosides	Aminoglycoside_N-acetyltransferases	AAC6-PRIME	0	0	0	1.27401	0	0	12.4042	0	0	0	0	0	0	0	0	0	0	0	0	0	3.16446	0	0	0	0	0	0	0	0	11.8571	0	0	0	13.4916	8.48207	0	0	0	0	0	0	0	0	7.11743	4.12475
MEG_1016|Drugs|Aminoglycosides|Aminoglycoside_O-phosphotransferases|APH2-DPRIME	Drugs	Aminoglycosides	Aminoglycoside_O-phosphotransferases	APH2-DPRIME	0	0	5.79972	2.22951	0	4.75148	173.659	154.105	302.19	297.056	54.4965	79.6804	48.5289	122.773	87.5346	135.16	197.934	216.154	153.039	141.646	216.766	158.916	201.263	165.74	166.594	200.117	1009.72	156.583	289.492	152.167	172.446	197.33	162.209	250.944	161.159	293.576	96.5653	86.0047	166.009	101.35	298.74	253.298	256.454	122.183	140.242
MEG_6998|Drugs|Tetracyclines|Tetracycline_resistance_ribosomal_protection_proteins|TET44	Drugs	Tetracyclines	Tetracycline_resistance_ribosomal_protection_proteins	TET44	0	0	0	0	0	0	45.1867	0	0	0	0	0	0	0	0	36.5848	0	0	0	0	0	0	39.7111	0	0	0	0	0	0	0	0	0	18.7925	0	0	0	34.8708	0	0	26.0827	0	0	33.4889	58.1257	20.6238
MEG_7211|Drugs|Tetracyclines|Tetracycline_resistance_ribosomal_protection_proteins|TETW	Drugs	Tetracyclines	Tetracycline_resistance_ribosomal_protection_proteins	TETW	0	13.6988	10.955	0	0	0	22.1503	46.5222	0	0	0	0	40.8084	0	25.0099	0	0	0	0	0	0	0	0	0	0	0	0	0	0	0	41.1812	0	15.8252	0	55.1335	0	14.306	19.5465	0	0	0	0	0	0	0
MEG_7212|Drugs|Tetracyclines|Tetracycline_resistance_ribosomal_protection_proteins|TETW	Drugs	Tetracyclines	Tetracycline_resistance_ribosomal_protection_proteins	TETW	0	7.82789	10.3106	0	0	0	17.7203	41.6762	0	0	0	0	23.1615	0	0	0	0	0	0	0	0	0	0	0	0	0	0	0	0	0	32.6018	0	0	0	48.7719	0	0	21.1102	0	0	0	0	0	0	13.0617
MEG_7216|Drugs|Tetracyclines|Tetracycline_resistance_ribosomal_protection_proteins|TETW	Drugs	Tetracyclines	Tetracycline_resistance_ribosomal_protection_proteins	TETW	0	10.5187	0	0	0	0	23.0363	42.6454	0	0	0	0	26.4703	0	0	16.2599	0	0	0	0	0	0	0	0	0	0	0	0	0	0	28.3121	0	21.7597	0	37.1091	26.5546	0	14.0735	0	11.9235	0	0	0	0	18.5614
MEG_7224|Drugs|Tetracyclines|Tetracycline_resistance_ribosomal_protection_proteins|TETW	Drugs	Tetracyclines	Tetracycline_resistance_ribosomal_protection_proteins	TETW	0	9.78487	0	0	0	0	12.4042	39.7377	0	0	7.69363	0	27.5732	0	21.2584	0	0	0	0	0	12.6578	0	13.5379	0	0	0	0	0	0	0	28.3121	0	0	0	41.3501	20.6536	0	21.1102	0	17.8853	0	0	14.1006	0	20.6238
MEG_2802|Drugs|MLS|23S_rRNA_methyltransferases|ERMB	Drugs	MLS	23S_rRNA_methyltransferases	ERMB	0	0	0	0	0	0	6.20209	0	0	0	0	0	0	0	0	20.3249	0	8.92378	5.73897	0	0	0	0	0	0	11.7716	0	0	0	0	0	0	0	0	0	0	10.7295	0	0	0	0	0	0	0	0
MEG_2803|Drugs|MLS|23S_rRNA_methyltransferases|ERMB	Drugs	MLS	23S_rRNA_methyltransferases	ERMB	0	0	0	0	0	0	8.86013	0	0	0	0	11.0667	0	0	0	16.2599	0	24.7883	7.65196	7.55443	0	0	0	0	0	18.8346	6.10939	0	25.5435	0	0	0	7.91262	16.1899	0	0	15.2001	0	7.16586	0	0	0	0	0	8.2495
MEG_2579|Drugs|Trimethoprim|Dihydrofolate_reductase|DFRG	Drugs	Trimethoprim	Dihydrofolate_reductase	DFRG	35.8359	0	283.542	6.37003	0	0	18.6063	7.7537	0	0	0	6.64003	0	0	0	8.12995	39.5867	0	14.0286	0	11.0756	126.755	0	42.4974	11.8996	0	0	0	0	11.8571	0	0	7.91262	0	0	0	0	0	0	0	0	55.409	0	0	0
MEG_6997|Drugs|Tetracyclines|Tetracycline_resistance_ribosomal_protection_proteins|TET44	Drugs	Tetracyclines	Tetracycline_resistance_ribosomal_protection_proteins	TET44	0	0	0	0	0	0	92.1454	0	0	34.5712	23.0809	0	0	57.6662	0	41.666	48.9012	16.856	32.5208	18.8861	0	0	58.6641	0	16.4328	0	0	30.1674	0	0	0	0	26.7051	0	55.1335	22.1289	81.3652	42.2205	33.4407	42.4775	0	76.5171	54.6397	94.899	36.4353
MEG_986|Drugs|Aminoglycosides|Aminoglycoside_O-nucleotidyltransferases|ANT6	Drugs	Aminoglycosides	Aminoglycoside_O-nucleotidyltransferases	ANT6	0	0	0	0	0	0	12.4042	23.2611	48.3505	0	7.05249	11.0667	0	0	0	23.3736	0	19.8306	10.2026	16.0532	26.1068	0	22.5631	23.3736	28.3324	20.0117	259.371	22.9847	25.5435	0	38.6074	0	27.6942	56.6647	16.9641	47.2082	11.6236	11.7279	32.2464	19.3757	39.5158	105.541	46.7082	23.7248	23.3736
MEG_6991|Drugs|Tetracyclines|Tetracycline_resistance_ribosomal_protection_proteins|TET40	Drugs	Tetracyclines	Tetracycline_resistance_ribosomal_protection_proteins	TET40	36.3929	0	32.8651	7.96254	0	0	214.415	137.628	316.696	198.464	96.8115	113.987	127.94	273.45	198.829	135.16	237.52	95.1869	56.7521	413.605	225.468	146.619	152.527	461.097	457.285	477.928	31.6577	64.6444	136.232	310.262	56.6241	0	97.9186	132.218	110.267	311.279	155.577	118.061	96.7391	413.597	151.741	232.19	175.376	485.171	117.555
MEG_7163|Drugs|Tetracyclines|Tetracycline_resistance_ribosomal_protection_proteins|TETO	Drugs	Tetracyclines	Tetracycline_resistance_ribosomal_protection_proteins	TETO	0	7.33865	0	0	0	0	0	36.8301	0	0	0	0	25.3674	0	0	0	0	0	0	0	0	0	0	0	0	0	0	0	0	0	24.0224	0	14.8362	0	22.2654	0	0	17.9828	0	0	0	0	0	0	17.1865
MEG_7229|Drugs|Tetracyclines|Tetracycline_resistance_ribosomal_protection_proteins|TETW	Drugs	Tetracyclines	Tetracycline_resistance_ribosomal_protection_proteins	TETW	0	0	0	0	0	0	0	23.2611	0	0	26.2866	0	0	0	23.7594	0	0	24.7883	23.5936	0	15.0312	22.7023	31.5884	21.2487	17.5661	18.8346	0	24.4212	0	0	22.3065	0	20.7706	0	24.386	0	13.4119	28.9288	21.4976	29.8088	20.5482	0	0	20.166	23.3736
MEG_7217|Drugs|Tetracyclines|Tetracycline_resistance_ribosomal_protection_proteins|TETW	Drugs	Tetracyclines	Tetracycline_resistance_ribosomal_protection_proteins	TETW	0	10.2741	9.6662	0	0	0	0	62.0296	0	0	0	14.3867	35.2937	0	27.5109	19.3086	0	0	0	0	0	0	12.6354	0	0	0	0	0	0	0	34.3177	0	0	0	33.9283	0	0	25.0195	0	0	0	36.9393	0	0	19.2488
MEG_2842|Drugs|MLS|23S_rRNA_methyltransferases|ERMQ	Drugs	MLS	23S_rRNA_methyltransferases	ERMQ	0	0	0	0	0	0	0	7.7537	0	0	0	0	0	61.3866	0	0	0	0	0	9.44304	0	0	0	0	10.7663	0	0	0	0	0	0	0	0	0	0	0	0	0	0	21.6114	0	0	0	15.4211	12.3743
MEG_7228|Drugs|Tetracyclines|Tetracycline_resistance_ribosomal_protection_proteins|TETW	Drugs	Tetracyclines	Tetracycline_resistance_ribosomal_protection_proteins	TETW	0	0	0	0	0	0	0	20.3535	0	0	0	0	0	0	0	0	0	0	0	0	0	0	0	0	0	0	0	0	0	0	0	0	0	0	0	0	0	0	0	0	0	0	0	0	0
MEG_7227|Drugs|Tetracyclines|Tetracycline_resistance_ribosomal_protection_proteins|TETW	Drugs	Tetracyclines	Tetracycline_resistance_ribosomal_protection_proteins	TETW	0	0	0	0	0	0	0	18.415	0	21.767	24.3632	0	0	24.1826	0	0	0	19.8306	20.4052	0	22.1512	27.432	14.4404	0	12.4663	22.3661	0	22.9847	0	0	14.585	0	0	0	18.0244	26.5546	15.2001	23.4558	15.526	23.1018	33.1933	0	17.6257	0	19.2488
MEG_7220|Drugs|Tetracyclines|Tetracycline_resistance_ribosomal_protection_proteins|TETW	Drugs	Tetracyclines	Tetracycline_resistance_ribosomal_protection_proteins	TETW	0	0	0	0	0	0	0	26.1687	0	0	23.722	0	16.5439	26.0428	26.2604	0	0	16.856	20.4052	0	19.7779	25.5401	15.3429	0	14.1662	23.5432	0	0	0	0	0	0	0	0	23.3257	30.9804	0	14.0735	0	26.0827	22.1289	0	16.7444	16.6073	20.6238
MEG_7236|Drugs|Tetracyclines|Tetracycline_resistance_ribosomal_protection_proteins|TETW	Drugs	Tetracyclines	Tetracycline_resistance_ribosomal_protection_proteins	TETW	0	0	0	0	0	0	0	26.1687	0	0	0	0	0	0	0	0	0	0	0	0	0	0	0	0	0	0	0	0	0	0	0	0	0	0	0	0	0	0	0	0	0	0	0	0	0
MEG_7173|Drugs|Tetracyclines|Tetracycline_resistance_ribosomal_protection_proteins|TETO	Drugs	Tetracyclines	Tetracycline_resistance_ribosomal_protection_proteins	TETO	0	9.051	0	0	0	0	0	27.138	0	0	0	0	18.7498	0	16.2564	0	0	0	0	0	0	0	0	0	0	0	0	0	0	0	24.8803	0	0	0	34.9886	0	0	21.1102	0	8.94264	0	0	0	0	14.4366
MEG_7174|Drugs|Tetracyclines|Tetracycline_resistance_ribosomal_protection_proteins|TETO	Drugs	Tetracyclines	Tetracycline_resistance_ribosomal_protection_proteins	TETO	0	3.91395	0	0	0	0	0	24.2303	0	0	0	0	0	0	0	0	0	0	0	0	0	0	0	0	0	0	0	0	0	0	15.4429	0	0	0	22.2654	0	0	13.2916	0	0	0	0	0	0	0
MEG_7230|Drugs|Tetracyclines|Tetracycline_resistance_ribosomal_protection_proteins|TETW	Drugs	Tetracyclines	Tetracycline_resistance_ribosomal_protection_proteins	TETW	0	9.29562	0	0	0	0	0	25.1995	0	0	0	0	19.8527	0	17.5069	0	0	0	17.2169	0	18.1956	32.1616	14.4404	0	0	21.1889	0	0	0	0	0	0	0	0	33.9283	0	0	17.9828	0	0	0	0	0	0	18.5614
MEG_7233|Drugs|Tetracyclines|Tetracycline_resistance_ribosomal_protection_proteins|TETW	Drugs	Tetracyclines	Tetracycline_resistance_ribosomal_protection_proteins	TETW	0	0	0	0	0	0	0	22.2919	33.8453	28.1691	19.2341	0	0	0	0	0	32.6008	15.8645	21.0429	14.1646	22.1512	26.486	30.6859	0	15.2995	0	0	0	0	0	17.1588	0	0	0	22.2654	28.0299	18.7766	0	15.526	20.1209	0	0	15.8632	0	21.9987
MEG_7225|Drugs|Tetracyclines|Tetracycline_resistance_ribosomal_protection_proteins|TETW	Drugs	Tetracyclines	Tetracycline_resistance_ribosomal_protection_proteins	TETW	0	5.38168	0	0	0	0	0	24.2303	0	0	0	0	27.5732	0	0	0	0	0	0	0	0	0	0	0	0	0	0	0	0	0	28.3121	0	0	0	32.868	0	0	21.8921	0	53.6558	0	0	0	0	18.5614
MEG_1553|Drugs|Phenicol|Chloramphenicol_acetyltransferases|CAT	Drugs	Phenicol	Chloramphenicol_acetyltransferases	CAT	0	0	0	0	0	0	0	0	178.897	0	0	8.85337	0	0	0	0	0	0	0	0	0	0	0	0	3.39989	15.3031	4.44319	0	0	0	0	0	0	0	0	0	0	0	0	0	0	0	0	0	25.436
MEG_173|Drugs|Aminoglycosides|Aminoglycoside_N-acetyltransferases|AAC6-PRIME	Drugs	Aminoglycosides	Aminoglycoside_N-acetyltransferases	AAC6-PRIME	24.1381	9.29562	0	35.9907	9.13112	45.139	0	0	21.7577	0	0	8.85337	0	0	0	0	0	0	0	0	0	0	0	10.6244	30.0323	0	0	0	0	0	22.3065	0	6.92354	0	0	0	0	0	0	0	0	0	0	0	0
MEG_303|Drugs|Aminoglycosides|Aminoglycoside_N-acetyltransferases|AAC6-PRIME	Drugs	Aminoglycosides	Aminoglycoside_N-acetyltransferases	AAC6-PRIME	3.89924	0	0	4.14052	1.20146	10.6908	0	0	9.67009	0	0	0	0	0	0	0	0	0	0	0	0	0	0	0	3.39989	0	0	0	0	0	0	0	0	0	0	0	0	0	0	0	0	0	0	0	0
MEG_6971|Drugs|Tetracyclines|Tetracycline_resistance_ribosomal_protection_proteins|TET32	Drugs	Tetracyclines	Tetracycline_resistance_ribosomal_protection_proteins	TET32	0	0	0	0	0	0	0	0	62.8556	0	16.6695	0	134.557	0	0	0	0	0	0	0	0	0	0	552.467	0	0	0	0	0	45.4524	0	0	0	0	0	0	0	0	0	0	0	0	0	0	0
MEG_2835|Drugs|MLS|23S_rRNA_methyltransferases|ERMG	Drugs	MLS	23S_rRNA_methyltransferases	ERMG	0	0	0	0	0	0	0	0	33.8453	0	7.69363	6.64003	0	22.3224	0	0	0	52.5511	14.6663	20.7747	0	10.4052	9.92778	0	23.7992	22.3661	0	28.7308	0	25.6905	10.2953	0	15.8252	0	15.9039	0	17.8825	0	32.2464	14.9044	17.387	0	9.69415	26.0972	16.499
MEG_1558|Drugs|Phenicol|Chloramphenicol_acetyltransferases|CAT	Drugs	Phenicol	Chloramphenicol_acetyltransferases	CAT	0	0	0	0	0	0	0	0	9.67009	0	0	12.1734	0	0	11.2544	0	0	80.314	13.3909	0	0	0	0	0	0	0	0	103.431	0	0	6.00559	0	67.2572	94.4411	18.0244	0	0	0	0	0	9.4838	0	21.1509	0	7.56205
MEG_2834|Drugs|MLS|23S_rRNA_methyltransferases|ERMG	Drugs	MLS	23S_rRNA_methyltransferases	ERMG	0	0	0	0	0	0	0	0	60.4381	33.2908	24.3632	24.3468	9.92636	178.579	12.5049	20.3249	27.9436	153.687	68.8677	72.7114	12.6578	67.161	52.3465	19.1238	99.73	76.5155	13.3296	83.3194	0	65.2143	46.3288	0	42.5303	129.519	84.8207	131.298	49.1768	19.5465	128.986	43.2228	80.6123	65.963	48.4707	73.5468	68.7459
MEG_2836|Drugs|MLS|23S_rRNA_methyltransferases|ERMG	Drugs	MLS	23S_rRNA_methyltransferases	ERMG	0	0	0	0	0	0	0	0	55.603	17.9258	12.8227	13.2801	0	61.3866	0	0	18.629	50.5681	33.7962	38.7165	0	19.8645	16.2455	0	24.9325	25.8976	8.88638	48.8424	0	15.8095	0	0	24.7269	0	26.5065	39.832	19.6707	8.60047	56.1326	19.3757	42.6771	23.7467	21.1509	41.5183	21.9987
MEG_1012|Drugs|Aminoglycosides|Aminoglycoside_O-phosphotransferases|APH2-DPRIME	Drugs	Aminoglycosides	Aminoglycoside_O-phosphotransferases	APH2-DPRIME	0	0	0	0	0	0	0	0	0	215.11	85.271	0	0	197.181	67.5267	0	137.389	128.899	131.359	29.2734	46.6758	107.836	13.5379	0	11.8996	67.0982	3350.72	244.212	127.717	152.167	16.3009	0	0	91.7428	0	11.8021	7.15299	22.674	0	18.6305	77.451	23.7467	26.4386	18.9798	13.0617
MEG_6165|Drugs|Nucleosides|Streptothricin_acetyltransferase|SAT	Drugs	Nucleosides	Streptothricin_acetyltransferase	SAT	0	0	0	0	0	0	0	0	0	23.0475	0	0	0	0	0	0	0	20.8221	0	12.276	0	0	32.4909	16.999	20.3993	0	213.273	0	0	0	0	0	0	0	9.54233	56.0598	0	0	35.8293	6.70698	30.032	0	36.1327	0	0
MEG_6970|Drugs|Tetracyclines|Tetracycline_resistance_ribosomal_protection_proteins|TET32	Drugs	Tetracyclines	Tetracycline_resistance_ribosomal_protection_proteins	TET32	0	0	0	0	0	0	0	0	0	39.6929	16.0284	0	39.7055	0	30.0119	0	51.2299	0	15.9416	0	0	0	22.5631	144.491	15.2995	0	0	0	0	0	0	0	0	0	0	0	48.2827	0	0	26.0827	0	0	24.676	0	0
MEG_7168|Drugs|Tetracyclines|Tetracycline_resistance_ribosomal_protection_proteins|TETO	Drugs	Tetracyclines	Tetracycline_resistance_ribosomal_protection_proteins	TETO	0	0	0	0	0	0	0	0	0	14.0846	0	0	0	0	0	0	0	0	14.6663	0	10.2845	17.9727	0	0	0	0	0	0	0	0	0	0	0	0	15.9039	0	0	0	0	20.1209	0	0	0	0	0
MEG_7231|Drugs|Tetracyclines|Tetracycline_resistance_ribosomal_protection_proteins|TETW	Drugs	Tetracyclines	Tetracycline_resistance_ribosomal_protection_proteins	TETW	0	0	0	0	0	0	0	0	0	23.0475	20.5163	0	24.2644	0	18.7574	14.2274	0	15.8645	14.6663	0	15.8223	27.432	11.7328	0	18.1327	21.1889	0	22.9847	0	0	20.5906	0	0	0	20.1449	0	0	17.9828	22.6919	20.8662	33.1933	0	18.507	0	26.1234
MEG_88|Drugs|Aminoglycosides|Aminoglycoside_N-acetyltransferases|AAC6-PRIME	Drugs	Aminoglycosides	Aminoglycoside_N-acetyltransferases	AAC6-PRIME	0	0	0	0	0	0	0	0	0	64.0207	0	0	0	0	0	0	0	0	28.0572	0	0	0	15.3429	0	75.9308	0	0	0	0	0	0	0	0	0	0	0	0	0	0	0	0	0	0	0	16.499
MEG_1058|Drugs|Aminoglycosides|Aminoglycoside_O-phosphotransferases|APH3-DPRIME	Drugs	Aminoglycosides	Aminoglycoside_O-phosphotransferases	APH3-DPRIME	4.64195	0	0	5.09603	5.52673	3.95957	0	0	0	0	4.48795	0	0	0	0	0	0	0	0	0	0	0	0	0	0	0	0	0	0	0	0	0	0	0	0	0	0	0	0	0	0	0	0	0	0
MEG_1087|Drugs|Aminoglycosides|Aminoglycoside_O-phosphotransferases|APH6	Drugs	Aminoglycosides	Aminoglycoside_O-phosphotransferases	APH6	4.64195	0	0	0	2.40293	2.37574	0	0	0	0	5.12909	0	0	0	0	0	0	0	0	0	0	0	0	0	0	0	0	0	0	0	0	0	0	0	0	0	0	0	0	0	0	0	0	0	0
MEG_2435|Drugs|betalactams|Class_A_betalactamases|CTX	Drugs	betalactams	Class_A_betalactamases	CTX	0	0	0	0	0	0	0	0	0	0	7.05249	0	0	0	0	0	0	0	0	0	0	0	0	0	0	0	0	0	0	0	0	0	0	0	0	0	0	0	0	0	0	0	0	0	0
MEG_1180|Drugs|Multi-drug_resistance|Multi-drug_RND_efflux_regulator|ASMA	Drugs	Multi-drug_resistance	Multi-drug_RND_efflux_regulator	ASMA	11.3264	0	0	19.4286	18.5025	13.0666	0	0	0	0	19.8752	0	0	0	27.5109	0	0	14.873	0	0	0	0	0	0	0	0	0	0	48.2487	0	0	0	0	0	0	0	0	0	0	12.6687	0	0	0	0	0
MEG_6631|Drugs|Sulfonamides|Sulfonamide-resistant_dihydropteroate_synthases|SULII	Drugs	Sulfonamides	Sulfonamide-resistant_dihydropteroate_synthases	SULII	0	0	0	5.41453	2.16263	0	0	0	0	0	11.5404	0	0	0	0	0	0	0	0	0	0	0	0	0	0	0	0	0	0	0	0	0	0	0	0	0	0	0	0	0	0	0	0	0	0
MEG_1086|Drugs|Aminoglycosides|Aminoglycoside_O-phosphotransferases|APH6	Drugs	Aminoglycosides	Aminoglycoside_O-phosphotransferases	APH6	4.45627	0	0	2.22951	4.08497	0	0	0	0	0	7.69363	0	0	0	0	0	0	0	0	0	0	0	0	0	0	0	0	0	0	0	0	0	0	0	0	0	0	0	0	0	0	0	0	0	0
MEG_1091|Drugs|Aminoglycosides|Aminoglycoside_O-phosphotransferases|APH6	Drugs	Aminoglycosides	Aminoglycoside_O-phosphotransferases	APH6	4.82763	0	0	4.14052	2.64322	4.35552	0	0	0	0	3.84681	0	0	0	0	0	0	0	0	0	0	0	0	0	0	0	0	0	0	0	0	0	0	0	0	0	0	0	0	0	0	0	0	0	0
MEG_6629|Drugs|Sulfonamides|Sulfonamide-resistant_dihydropteroate_synthases|SULII	Drugs	Sulfonamides	Sulfonamide-resistant_dihydropteroate_synthases	SULII	0	0	0	3.18502	0	0	0	0	0	0	3.84681	0	0	0	0	0	0	0	0	0	0	0	0	0	0	0	0	0	0	0	0	0	0	0	0	0	0	0	0	0	0	0	0	0	0
MEG_1019|Drugs|Aminoglycosides|Aminoglycoside_O-phosphotransferases|APH3-DPRIME	Drugs	Aminoglycosides	Aminoglycoside_O-phosphotransferases	APH3-DPRIME	14.6686	0	9.6662	21.9766	11.7743	10.2949	0	0	0	0	16.6695	0	0	0	0	0	0	0	0	0	8.70227	0	0	0	0	0	0	0	0	0	0	0	0	0	0	0	0	0	0	0	0	0	0	0	0
MEG_1096|Drugs|Aminoglycosides|Aminoglycoside_O-phosphotransferases|APH6	Drugs	Aminoglycosides	Aminoglycoside_O-phosphotransferases	APH6	7.05577	0	0	0	3.1238	3.16765	0	0	0	0	5.77022	0	0	0	0	0	0	0	0	0	0	0	0	0	0	0	0	0	0	0	0	0	0	0	0	0	0	0	0	0	0	0	0	0	0
MEG_1057|Drugs|Aminoglycosides|Aminoglycoside_O-phosphotransferases|APH3-DPRIME	Drugs	Aminoglycosides	Aminoglycoside_O-phosphotransferases	APH3-DPRIME	9.09822	0	0	13.6956	9.13112	7.52317	0	0	0	0	8.33476	0	0	0	0	0	0	0	0	0	5.53781	0	0	0	0	0	0	0	0	0	0	0	0	0	0	0	0	0	0	0	0	0	0	0	0
MEG_1190|Drugs|Bacitracin|Undecaprenyl_pyrophosphate_phosphatase|BACA	Drugs	Bacitracin	Undecaprenyl_pyrophosphate_phosphatase	BACA	5.01331	0	0	2.86651	0	0	0	0	0	0	6.41136	0	0	0	0	0	0	0	0	0	0	0	0	0	0	0	0	0	0	0	0	0	0	0	0	0	0	0	0	0	0	0	0	0	0
MEG_316|Drugs|Aminoglycosides|Aminoglycoside_N-acetyltransferases|AAC6-PRIME	Drugs	Aminoglycosides	Aminoglycoside_N-acetyltransferases	AAC6-PRIME	0	0	0	0	0	0	0	0	0	0	15.3873	0	0	0	0	0	0	0	10.8403	0	0	0	0	0	5.09983	0	0	0	0	0	0	0	0	0	0	0	0	0	26.2748	0	0	0	12.338	0	13.0617
MEG_1085|Drugs|Aminoglycosides|Aminoglycoside_O-phosphotransferases|APH6	Drugs	Aminoglycosides	Aminoglycoside_O-phosphotransferases	APH6	4.82763	0	0	4.77752	2.88351	3.16765	0	0	0	0	5.77022	0	0	0	0	0	0	0	0	0	0	0	0	0	0	0	0	0	0	0	0	0	0	0	0	0	0	0	0	0	0	0	0	0	0
MEG_1045|Drugs|Aminoglycosides|Aminoglycoside_O-phosphotransferases|APH3-DPRIME	Drugs	Aminoglycosides	Aminoglycoside_O-phosphotransferases	APH3-DPRIME	11.3264	0	5.15531	12.4216	11.534	10.2949	0	0	0	0	8.33476	0	0	0	0	0	0	8.92378	0	0	13.449	0	0	0	0	0	0	0	0	0	0	0	0	0	0	0	0	0	0	0	0	0	0	0	0
MEG_4061|Drugs|Multi-drug_resistance|Multi-drug_ABC_efflux_pumps|MSBA	Drugs	Multi-drug_resistance	Multi-drug_ABC_efflux_pumps	MSBA	27.2947	0	10.955	33.7612	28.5948	20.1938	0	0	0	0	31.4156	0	0	0	65.0257	0	62.873	23.7967	0	15.1089	12.6578	15.1349	0	0	0	0	0	0	0	0	0	0	0	0	0	0	0	0	20.3033	25.3375	0	0	0	0	0
MEG_6619|Drugs|Sulfonamides|Sulfonamide-resistant_dihydropteroate_synthases|SULII	Drugs	Sulfonamides	Sulfonamide-resistant_dihydropteroate_synthases	SULII	0	0	0	8.91804	2.64322	0	0	0	0	0	12.8227	0	0	0	0	0	0	0	0	0	0	0	0	0	0	0	0	0	0	0	0	0	0	0	0	0	0	0	0	0	0	0	0	0	0
MEG_1055|Drugs|Aminoglycosides|Aminoglycoside_O-phosphotransferases|APH3-DPRIME	Drugs	Aminoglycosides	Aminoglycoside_O-phosphotransferases	APH3-DPRIME	10.2123	0	0	8.28104	7.68936	3.95957	0	0	0	0	5.77022	0	0	0	0	0	0	0	0	0	0	0	0	0	0	0	0	0	0	0	0	0	0	0	0	0	0	0	0	0	0	0	0	0	0
MEG_364|Drugs|Aminoglycosides|Aminoglycoside_N-acetyltransferases|AAC6-PRIME	Drugs	Aminoglycosides	Aminoglycoside_N-acetyltransferases	AAC6-PRIME	0	0	0	0	0	0	0	0	0	0	13.4638	0	0	0	0	17.2761	0	0	13.3909	15.1089	0	0	0	0	6.79977	0	0	0	0	0	0	0	0	0	0	0	0	0	17.9147	0	0	0	14.9819	0	6.87459
MEG_75|Drugs|Aminoglycosides|Aminoglycoside_N-acetyltransferases|AAC6-PRIME	Drugs	Aminoglycosides	Aminoglycoside_N-acetyltransferases	AAC6-PRIME	0	0	0	0	0	0	0	0	0	0	13.4638	0	0	16.7418	0	0	0	0	6.37664	16.9975	0	0	0	0	0	0	0	0	0	0	0	0	0	0	0	0	0	0	19.109	0	0	0	0	0	12.3743
MEG_352|Drugs|Aminoglycosides|Aminoglycoside_N-acetyltransferases|AAC6-PRIME	Drugs	Aminoglycosides	Aminoglycoside_N-acetyltransferases	AAC6-PRIME	0	0	0	0	0	0	0	0	0	0	16.0284	0	0	0	0	16.2599	0	0	0	0	0	0	0	0	0	0	0	0	0	0	0	0	0	0	0	0	0	0	28.6634	0	0	0	0	0	13.7492
MEG_1053|Drugs|Aminoglycosides|Aminoglycoside_O-phosphotransferases|APH3-DPRIME	Drugs	Aminoglycosides	Aminoglycoside_O-phosphotransferases	APH3-DPRIME	14.1115	0	5.15531	14.6511	12.0146	11.4827	0	0	0	0	8.33476	0	0	0	0	0	0	0	3.82598	0	0	0	0	0	0	0	0	0	0	0	0	0	9.89077	0	0	0	0	0	0	0	0	0	0	0	0
MEG_1046|Drugs|Aminoglycosides|Aminoglycoside_O-phosphotransferases|APH3-DPRIME	Drugs	Aminoglycosides	Aminoglycoside_O-phosphotransferases	APH3-DPRIME	10.955	0	7.73296	13.0586	6.24761	9.107	0	0	0	0	9.61704	0	0	0	0	0	0	4.95765	0	0	9.49338	0	0	0	0	0	0	0	0	0	0	0	0	0	0	0	0	0	0	0	0	0	0	0	0
MEG_4031|Drugs|MLS|Macrolide_phosphotransferases|MPHB	Drugs	MLS	Macrolide_phosphotransferases	MPHB	0	0	0	0	2.88351	0	0	0	0	0	24.3632	0	0	29.7632	0	0	0	0	0	0	0	0	0	0	0	0	0	0	0	0	0	0	0	0	0	0	0	0	0	0	0	0	0	0	0
MEG_5400|Drugs|betalactams|Penicillin_binding_protein|PBP2	Drugs	betalactams	Penicillin_binding_protein	PBP2	17.4537	0	0	14.9696	19.9443	17.4221	0	0	0	0	23.0809	0	0	0	35.0138	0	44.244	13.8814	0	0	0	12.2971	0	0	0	0	0	0	0	0	0	0	0	0	0	0	0	0	0	18.6305	0	0	0	0	0
MEG_4285|Drugs|betalactams|Mutant_porin_proteins|OMPD	Drugs	betalactams	Mutant_porin_proteins	OMPD	0	0	0	0	0	0	0	0	0	0	13.4638	0	40.8084	0	0	0	100.131	0	9.56495	0	0	0	0	89.2446	0	0	0	0	0	209.476	0	0	0	0	0	0	0	0	0	0	0	0	0	0	0
MEG_1095|Drugs|Aminoglycosides|Aminoglycoside_O-phosphotransferases|APH6	Drugs	Aminoglycosides	Aminoglycoside_O-phosphotransferases	APH6	4.2706	0	0	5.09603	2.64322	3.16765	0	0	0	0	7.05249	0	0	0	0	0	0	0	0	0	0	0	0	0	0	0	0	0	0	0	0	0	0	0	0	0	0	0	0	0	0	0	0	0	0
MEG_6618|Drugs|Sulfonamides|Sulfonamide-resistant_dihydropteroate_synthases|SULII	Drugs	Sulfonamides	Sulfonamide-resistant_dihydropteroate_synthases	SULII	0	0	0	5.09603	1.44176	0	0	0	0	0	8.9759	0	0	0	0	0	0	0	0	0	0	0	0	0	0	0	0	0	0	0	0	0	0	0	0	0	0	0	0	0	0	0	0	0	0
MEG_1054|Drugs|Aminoglycosides|Aminoglycoside_O-phosphotransferases|APH3-DPRIME	Drugs	Aminoglycosides	Aminoglycoside_O-phosphotransferases	APH3-DPRIME	13.5545	0	7.73296	16.5621	9.13112	14.2544	0	0	0	0	9.61704	0	0	0	0	0	0	0	0	0	11.0756	0	0	0	0	0	0	0	0	0	0	0	0	0	0	0	0	0	0	0	0	0	0	0	0
MEG_2797|Drugs|MLS|23S_rRNA_methyltransferases|ERMB	Drugs	MLS	23S_rRNA_methyltransferases	ERMB	0	0	0	0	0	0	0	0	0	0	0	9.96005	0	0	0	0	0	13.8814	0	7.55443	0	0	0	0	0	15.3031	0	0	0	0	0	0	0	0	0	0	0	0	0	0	0	0	0	14.2349	6.87459
MEG_2792|Drugs|MLS|23S_rRNA_methyltransferases|ERMB	Drugs	MLS	23S_rRNA_methyltransferases	ERMB	0	0	0	0	0	0	0	0	0	0	0	15.4934	0	0	7.50296	7.1137	0	22.8052	14.6663	11.3317	0	0	0	0	0	15.3031	2.77699	17.2385	48.2487	0	0	0	7.91262	0	0	0	21.459	0	0	0	0	0	0	0	4.81221
MEG_2788|Drugs|MLS|23S_rRNA_methyltransferases|ERMB	Drugs	MLS	23S_rRNA_methyltransferases	ERMB	0	0	0	0	0	0	0	0	0	0	0	7.7467	0	0	0	0	0	8.92378	0	15.1089	0	0	0	0	0	0	0	0	0	0	0	0	0	0	0	0	0	0	0	0	0	0	0	0	4.12475
MEG_185|Drugs|Aminoglycosides|Aminoglycoside_N-acetyltransferases|AAC6-PRIME	Drugs	Aminoglycosides	Aminoglycoside_N-acetyltransferases	AAC6-PRIME	0	0	0	0	0	0	0	0	0	0	0	30.9868	0	0	0	0	0	0	0	21.719	30.8535	0	0	65.871	0	0	0	0	0	0	0	0	0	0	23.3257	0	17.8825	0	0	0	0	0	14.1006	0	0
MEG_2794|Drugs|MLS|23S_rRNA_methyltransferases|ERMB	Drugs	MLS	23S_rRNA_methyltransferases	ERMB	0	0	0	0	0	0	0	0	0	0	0	6.64003	0	0	7.50296	19.3086	0	7.93225	8.28963	21.719	0	0	0	0	0	0	3.88779	11.4923	0	0	0	0	0	0	5.3013	0	9.83536	0	0	0	0	0	10.5754	8.30367	8.93696
MEG_2804|Drugs|MLS|23S_rRNA_methyltransferases|ERMB	Drugs	MLS	23S_rRNA_methyltransferases	ERMB	0	0	0	0	0	0	0	0	0	0	0	8.85337	0	0	0	0	0	11.8984	5.10131	17.9418	0	0	0	0	0	0	0	0	0	0	0	0	0	0	0	0	0	0	0	4.47132	0	0	0	7.11743	4.81221
MEG_1008|Drugs|Aminoglycosides|Aminoglycoside_O-phosphotransferases|APH2-DPRIME	Drugs	Aminoglycosides	Aminoglycoside_O-phosphotransferases	APH2-DPRIME	0	0	0	0	0	0	0	0	0	0	0	0	0	48.3652	0	0	0	0	0	0	0	22.7023	0	0	14.7328	0	0	0	0	0	0	0	0	0	0	0	0	0	0	0	0	0	0	0	0
MEG_1011|Drugs|Aminoglycosides|Aminoglycoside_O-phosphotransferases|APH2-DPRIME	Drugs	Aminoglycosides	Aminoglycoside_O-phosphotransferases	APH2-DPRIME	0	0	0	0	0	0	0	0	0	0	0	0	0	22.3224	0	0	0	0	0	0	0	0	0	0	0	0	0	0	0	0	0	0	0	0	0	0	0	0	0	0	0	0	0	0	0
MEG_2841|Drugs|MLS|23S_rRNA_methyltransferases|ERMQ	Drugs	MLS	23S_rRNA_methyltransferases	ERMQ	0	0	0	0	0	0	0	0	0	0	0	0	0	66.9672	0	0	0	0	0	0	0	0	0	0	7.36642	0	0	0	0	0	0	0	0	0	0	0	0	0	0	12.6687	0	0	0	21.3523	0
MEG_1189|Drugs|Bacitracin|Undecaprenyl_pyrophosphate_phosphatase|BACA	Drugs	Bacitracin	Undecaprenyl_pyrophosphate_phosphatase	BACA	3.3422	0	0	5.09603	2.64322	0	0	0	0	0	0	0	0	0	11.2544	0	0	0	0	0	0	0	0	0	0	0	0	0	0	0	0	0	0	0	0	0	0	0	0	0	0	0	0	0	0
MEG_2790|Drugs|MLS|23S_rRNA_methyltransferases|ERMB	Drugs	MLS	23S_rRNA_methyltransferases	ERMB	0	0	0	0	0	0	0	0	0	0	0	0	0	0	0	13.2112	0	0	6.37664	11.3317	0	0	0	0	0	9.41729	0	0	0	0	0	0	0	0	0	0	0	0	0	0	0	0	0	0	0
MEG_7162|Drugs|Tetracyclines|Tetracycline_resistance_ribosomal_protection_proteins|TETO	Drugs	Tetracyclines	Tetracycline_resistance_ribosomal_protection_proteins	TETO	0	0	0	0	0	0	0	0	0	0	0	0	0	0	0	25.4061	0	0	0	0	0	15.1349	0	0	0	0	0	0	0	98.8095	0	0	0	0	0	0	0	0	0	0	0	0	0	0	0
MEG_7152|Drugs|Tetracyclines|Tetracycline_resistance_ribosomal_protection_proteins|TETO	Drugs	Tetracyclines	Tetracycline_resistance_ribosomal_protection_proteins	TETO	0	0	0	0	5.76702	0	0	0	0	0	0	0	0	0	0	17.2761	0	0	0	0	0	0	0	0	0	0	0	0	0	0	0	0	0	0	0	0	0	0	0	16.3948	0	0	0	0	0
MEG_7070|Drugs|Tetracyclines|Tetracycline_resistance_MFS_efflux_pumps|TETD	Drugs	Tetracyclines	Tetracycline_resistance_MFS_efflux_pumps	TETD	0	0	0	0	0	0	0	0	0	0	0	0	0	0	0	0	13.9718	0	0	0	0	0	0	0	0	0	0	0	0	0	0	0	0	0	0	0	0	0	0	0	0	0	0	0	0
MEG_7171|Drugs|Tetracyclines|Tetracycline_resistance_ribosomal_protection_proteins|TETO	Drugs	Tetracyclines	Tetracycline_resistance_ribosomal_protection_proteins	TETO	0	0	0	0	0	0	0	0	0	0	0	0	0	0	0	0	0	0	10.8403	0	0	0	0	0	0	0	0	0	0	0	0	0	0	0	0	0	0	0	0	11.1783	0	0	0	0	0
MEG_7175|Drugs|Tetracyclines|Tetracycline_resistance_ribosomal_protection_proteins|TETO	Drugs	Tetracyclines	Tetracycline_resistance_ribosomal_protection_proteins	TETO	0	0	0	0	0	0	0	0	0	0	0	0	0	0	0	0	0	0	8.92729	0	0	18.9186	0	0	0	0	0	0	0	0	0	0	0	0	0	0	0	0	0	16.3948	0	0	0	0	0
MEG_7155|Drugs|Tetracyclines|Tetracycline_resistance_ribosomal_protection_proteins|TETO	Drugs	Tetracyclines	Tetracycline_resistance_ribosomal_protection_proteins	TETO	0	0	0	0	0	0	0	0	0	0	0	0	0	0	0	0	0	0	8.92729	0	0	0	0	0	0	0	0	0	0	0	0	0	0	0	0	0	0	0	0	0	0	0	0	0	0
MEG_7156|Drugs|Tetracyclines|Tetracycline_resistance_ribosomal_protection_proteins|TETO	Drugs	Tetracyclines	Tetracycline_resistance_ribosomal_protection_proteins	TETO	0	0	0	0	5.28644	0	0	0	0	0	0	0	0	0	0	0	0	0	11.4779	0	0	0	0	0	0	0	0	0	0	0	0	0	0	0	0	0	0	0	0	17.1401	0	0	0	0	0
MEG_7166|Drugs|Tetracyclines|Tetracycline_resistance_ribosomal_protection_proteins|TETO	Drugs	Tetracyclines	Tetracycline_resistance_ribosomal_protection_proteins	TETO	0	0	0	0	0	0	0	0	0	0	0	0	0	0	0	0	0	0	12.7533	0	0	0	0	0	0	0	0	0	0	0	0	0	0	0	0	0	0	0	0	0	0	0	0	0	0
MEG_7149|Drugs|Tetracyclines|Tetracycline_resistance_ribosomal_protection_proteins|TETO	Drugs	Tetracyclines	Tetracycline_resistance_ribosomal_protection_proteins	TETO	0	0	0	0	5.76702	0	0	0	0	0	0	0	0	0	0	0	0	0	12.7533	0	0	0	0	0	0	0	0	0	0	0	0	0	0	0	0	0	0	0	0	0	0	0	0	0	0
MEG_729|Drugs|betalactams|Penicillin_binding_protein|AMPH	Drugs	betalactams	Penicillin_binding_protein	AMPH	6.12738	0	0	7.32554	0	8.71104	0	0	0	0	0	0	0	0	0	0	0	0	0	9.44304	0	0	0	0	0	0	0	0	0	0	0	0	0	0	0	0	0	0	0	0	0	0	0	0	0
MEG_7176|Drugs|Tetracyclines|Tetracycline_resistance_ribosomal_protection_proteins|TETO	Drugs	Tetracyclines	Tetracycline_resistance_ribosomal_protection_proteins	TETO	0	0	0	0	0	0	0	0	0	0	0	0	0	0	0	0	0	0	0	0	15.0312	27.432	0	0	9.06637	0	0	0	0	0	0	0	0	45.8714	0	0	20.5648	14.0735	0	12.6687	31.6127	0	12.338	0	11.6868
MEG_7207|Drugs|Tetracyclines|Tetracycline_resistance_ribosomal_protection_proteins|TETW	Drugs	Tetracyclines	Tetracycline_resistance_ribosomal_protection_proteins	TETW	0	0	0	0	0	0	0	0	0	0	0	0	0	0	0	0	0	0	0	0	0	20.8104	0	0	0	0	0	0	0	0	0	0	0	0	0	0	0	0	0	15.6496	0	0	0	0	0
MEG_7014|Drugs|Tetracyclines|Tetracycline_resistance_MFS_efflux_pumps|TETA	Drugs	Tetracyclines	Tetracycline_resistance_MFS_efflux_pumps	TETA	0	0	0	0	0	0	0	0	0	0	0	0	0	0	0	0	0	0	0	0	0	17.9727	21.6606	57.3715	12.4663	0	8.33098	54.5886	0	0	0	0	0	0	0	0	0	0	0	9.68786	0	0	0	11.8624	0
MEG_7157|Drugs|Tetracyclines|Tetracycline_resistance_ribosomal_protection_proteins|TETO	Drugs	Tetracyclines	Tetracycline_resistance_ribosomal_protection_proteins	TETO	0	0	0	0	0	0	0	0	0	0	0	0	0	0	0	0	0	0	0	0	0	16.0808	0	0	0	0	0	0	0	63.2381	0	0	0	0	0	0	0	0	0	11.9235	0	0	0	0	0
MEG_1013|Drugs|Aminoglycosides|Aminoglycoside_O-phosphotransferases|APH2-DPRIME	Drugs	Aminoglycosides	Aminoglycoside_O-phosphotransferases	APH2-DPRIME	0	0	0	0	0	0	0	0	0	0	0	0	0	0	0	0	0	0	0	0	0	17.9727	0	0	0	0	0	0	0	0	0	0	0	0	0	0	0	0	0	0	0	0	0	0	0
MEG_997|Drugs|Aminoglycosides|Aminoglycoside_O-nucleotidyltransferases|ANT6	Drugs	Aminoglycosides	Aminoglycoside_O-nucleotidyltransferases	ANT6	0	0	0	0	0	0	0	0	0	0	0	0	0	0	0	0	0	0	0	0	0	0	18.0505	0	0	0	0	0	0	0	0	0	0	0	0	0	0	0	13.1374	0	0	0	17.6257	0	0
MEG_171|Drugs|Aminoglycosides|Aminoglycoside_N-acetyltransferases|AAC6-PRIME	Drugs	Aminoglycosides	Aminoglycoside_N-acetyltransferases	AAC6-PRIME	11.1407	4.89243	0	14.9696	2.16263	27.321	0	0	0	0	0	0	0	0	0	0	0	0	0	0	0	0	0	0	8.49972	0	0	0	0	0	0	0	0	0	0	0	0	0	0	0	0	0	0	0	0
MEG_7159|Drugs|Tetracyclines|Tetracycline_resistance_ribosomal_protection_proteins|TETO	Drugs	Tetracyclines	Tetracycline_resistance_ribosomal_protection_proteins	TETO	0	0	0	0	5.04614	0	0	0	0	0	0	0	0	0	0	0	0	0	0	0	0	0	0	0	0	0	0	0	0	75.0952	0	0	0	0	0	0	0	0	0	0	0	0	0	0	0
MEG_3608|Drugs|MLS|Lincosamide_nucleotidyltransferases|LNUA	Drugs	MLS	Lincosamide_nucleotidyltransferases	LNUA	14.1115	0	4.51089	0	7.20878	0	0	0	0	0	0	0	0	0	0	0	0	0	0	0	0	0	0	0	0	0	0	0	0	0	0	0	0	0	0	0	0	7.03675	48.9667	0	0	0	0	0	0
MEG_3601|Drugs|MLS|Lincosamide_nucleotidyltransferases|LNUA	Drugs	MLS	Lincosamide_nucleotidyltransferases	LNUA	3.89924	0	3.22207	0	2.40293	0	0	0	0	0	0	0	0	0	0	0	0	0	0	0	0	0	0	0	0	0	0	0	0	0	0	0	0	0	0	0	0	0	42.9952	0	0	0	0	0	0
MEG_3600|Drugs|MLS|Lincosamide_nucleotidyltransferases|LNUA	Drugs	MLS	Lincosamide_nucleotidyltransferases	LNUA	2.04246	0	0	0	0	0	0	0	0	0	0	0	0	0	0	0	0	0	0	0	0	0	0	0	0	0	0	0	0	0	0	0	0	0	0	0	0	0	8.36017	0	0	0	0	0	0
MEG_7154|Drugs|Tetracyclines|Tetracycline_resistance_ribosomal_protection_proteins|TETO	Drugs	Tetracyclines	Tetracycline_resistance_ribosomal_protection_proteins	TETO	0	0	0	0	5.04614	0	0	0	0	0	0	0	0	0	0	0	0	0	0	0	0	0	0	0	0	0	0	0	0	0	0	0	0	0	0	0	0	0	0	12.6687	0	0	0	0	0
MEG_7206|Drugs|Tetracyclines|Tetracycline_resistance_ribosomal_protection_proteins|TETW	Drugs	Tetracyclines	Tetracycline_resistance_ribosomal_protection_proteins	TETW	0	0	0	0	0	0	0	0	0	0	0	0	0	0	0	0	0	0	0	0	0	0	0	0	0	0	0	0	0	0	0	0	0	0	0	0	0	0	0	17.1401	0	0	0	0	0
MEG_1010|Drugs|Aminoglycosides|Aminoglycoside_O-phosphotransferases|APH2-DPRIME	Drugs	Aminoglycosides	Aminoglycoside_O-phosphotransferases	APH2-DPRIME	0	0	0	0	0	0	0	0	0	0	0	0	0	0	0	0	0	0	0	0	0	0	0	0	0	0	0	0	0	0	0	0	0	0	0	0	0	0	0	10.4331	0	0	0	0	0
MEG_7160|Drugs|Tetracyclines|Tetracycline_resistance_ribosomal_protection_proteins|TETO	Drugs	Tetracyclines	Tetracycline_resistance_ribosomal_protection_proteins	TETO	0	0	0	0	0	0	0	0	0	0	0	0	0	0	0	0	0	0	0	0	0	0	0	0	0	0	0	0	0	0	0	0	0	0	0	0	0	0	0	19.3757	0	0	0	0	0
MEG_7165|Drugs|Tetracyclines|Tetracycline_resistance_ribosomal_protection_proteins|TETO	Drugs	Tetracyclines	Tetracycline_resistance_ribosomal_protection_proteins	TETO	0	0	0	0	6.72819	0	0	0	0	0	0	0	0	0	0	0	0	0	0	0	0	0	0	0	0	0	0	0	0	0	0	0	0	0	0	0	0	0	0	11.1783	0	0	0	0	0
MEG_4074|Drugs|MLS|MLS_resistance_ABC_efflux_pumps|MSRD	Drugs	MLS	MLS_resistance_ABC_efflux_pumps	MSRD	0	0	0	0	0	0	0	0	0	0	0	0	0	0	0	0	0	0	0	0	0	0	0	0	0	0	0	0	0	0	0	0	0	0	0	0	0	0	0	0	0	0	0	0	8.2495
MEG_3448|Drugs|Aminoglycosides|Aminoglycoside_efflux_pumps|KDPE	Drugs	Aminoglycosides	Aminoglycoside_efflux_pumps	KDPE	1.48542	0	0	3.50352	0	0	0	0	0	0	0	0	0	0	0	0	0	0	0	0	0	0	0	0	0	0	0	0	0	0	0	0	0	0	0	0	0	0	0	0	0	0	0	0	0
MEG_7164|Drugs|Tetracyclines|Tetracycline_resistance_ribosomal_protection_proteins|TETO	Drugs	Tetracyclines	Tetracycline_resistance_ribosomal_protection_proteins	TETO	0	0	0	0	4.32527	0	0	0	0	0	0	0	0	0	0	0	0	0	0	0	0	0	0	0	0	0	0	0	0	0	0	0	0	0	0	0	0	0	0	0	0	0	0	0	0
MEG_7235|Drugs|Tetracyclines|Tetracycline_resistance_ribosomal_protection_proteins|TETW	Drugs	Tetracyclines	Tetracycline_resistance_ribosomal_protection_proteins	TETW	0	0	0	0	0	0	0	0	0	0	0	0	0	0	0	0	0	0	0	0	0	0	0	0	0	0	0	0	0	0	0	0	0	0	0	0	0	0	0	0	0	0	0	0	0
MEG_7153|Drugs|Tetracyclines|Tetracycline_resistance_ribosomal_protection_proteins|TETO	Drugs	Tetracyclines	Tetracycline_resistance_ribosomal_protection_proteins	TETO	0	0	0	0	5.04614	0	0	0	0	0	0	0	0	0	0	0	0	0	0	0	0	0	0	0	0	0	0	0	0	0	0	0	0	0	0	0	0	0	0	0	0	0	0	0	0
MEG_7234|Drugs|Tetracyclines|Tetracycline_resistance_ribosomal_protection_proteins|TETW	Drugs	Tetracyclines	Tetracycline_resistance_ribosomal_protection_proteins	TETW	0	0	0	0	0	0	0	0	0	0	0	0	0	0	0	0	0	0	0	0	0	0	0	0	0	0	0	0	0	0	0	0	0	0	0	0	0	0	0	0	0	0	0	0	0
MEG_7151|Drugs|Tetracyclines|Tetracycline_resistance_ribosomal_protection_proteins|TETO	Drugs	Tetracyclines	Tetracycline_resistance_ribosomal_protection_proteins	TETO	0	0	0	0	0	0	0	0	0	0	0	0	0	0	0	0	0	0	0	0	0	0	0	0	0	0	0	0	0	0	0	0	0	0	0	0	0	0	0	0	0	0	0	0	0
MEG_7237|Drugs|Tetracyclines|Tetracycline_resistance_ribosomal_protection_proteins|TETW	Drugs	Tetracyclines	Tetracycline_resistance_ribosomal_protection_proteins	TETW	0	0	0	0	0	0	0	0	0	0	0	0	0	0	0	0	0	0	0	0	0	0	0	0	0	0	0	0	0	0	0	0	0	0	0	0	0	0	0	0	0	0	0	0	0
MEG_3606|Drugs|MLS|Lincosamide_nucleotidyltransferases|LNUA	Drugs	MLS	Lincosamide_nucleotidyltransferases	LNUA	0	0	0	0	0	0	0	0	0	0	0	0	0	0	0	0	0	0	0	0	0	0	0	0	0	0	0	0	0	0	0	0	0	0	0	0	0	0	0	0	0	0	0	0	0
MEG_3830|Drugs|MLS|MLS_resistance_MFS_efflux_pumps|MEFE	Drugs	MLS	MLS_resistance_MFS_efflux_pumps	MEFE	0	0	0	0	0	0	0	0	0	0	0	0	0	0	0	0	0	0	0	0	0	0	0	0	0	0	0	0	0	0	0	0	0	0	0	0	0	0	0	0	0	0	0	0	0
MEG_2831|Drugs|MLS|23S_rRNA_methyltransferases|ERMF	Drugs	MLS	23S_rRNA_methyltransferases	ERMF	0	0	0	0	0	0	0	0	0	0	0	0	0	0	0	0	0	0	0	0	0	0	0	0	0	0	0	0	0	0	0	0	0	0	0	0	0	0	0	0	0	0	0	0	0
MEG_7240|Drugs|Tetracyclines|Tetracycline_inactivation_enzymes|TETX	Drugs	Tetracyclines	Tetracycline_inactivation_enzymes	TETX	0	0	0	0	0	0	0	0	0	0	0	0	0	0	0	0	0	0	0	0	0	0	0	0	0	0	0	0	0	0	0	0	0	0	0	0	0	0	0	0	0	0	0	0	0
MEG_2829|Drugs|MLS|23S_rRNA_methyltransferases|ERMF	Drugs	MLS	23S_rRNA_methyltransferases	ERMF	0	0	0	0	0	0	0	0	0	0	0	0	0	0	0	0	0	0	0	0	0	0	0	0	0	0	0	0	0	0	0	0	0	0	0	0	0	0	0	0	0	0	0	0	0
MEG_2833|Drugs|MLS|23S_rRNA_methyltransferases|ERMF	Drugs	MLS	23S_rRNA_methyltransferases	ERMF	0	0	0	0	0	0	0	0	0	0	0	0	0	0	0	0	0	0	0	0	0	0	0	0	0	0	0	0	0	0	0	0	0	0	0	0	0	0	0	0	0	0	0	0	0
MEG_7178|Drugs|Tetracyclines|Tetracycline_resistance_ribosomal_protection_proteins|TETQ	Drugs	Tetracyclines	Tetracycline_resistance_ribosomal_protection_proteins	TETQ	0	0	0	0	0	0	0	0	0	0	0	0	0	0	0	0	0	0	0	0	0	0	0	0	0	0	0	0	0	0	0	0	0	0	0	0	0	0	0	0	0	0	0	0	0
MEG_7183|Drugs|Tetracyclines|Tetracycline_resistance_ribosomal_protection_proteins|TETQ	Drugs	Tetracyclines	Tetracycline_resistance_ribosomal_protection_proteins	TETQ	0	0	0	0	0	0	0	0	0	0	0	0	0	0	0	0	0	0	0	0	0	0	0	0	0	0	0	0	0	0	0	0	0	0	0	0	0	0	0	0	0	0	0	0	0
MEG_7184|Drugs|Tetracyclines|Tetracycline_resistance_ribosomal_protection_proteins|TETQ	Drugs	Tetracyclines	Tetracycline_resistance_ribosomal_protection_proteins	TETQ	0	0	0	0	0	0	0	0	0	0	0	0	0	0	0	0	0	0	0	0	0	0	0	0	0	0	0	0	0	0	0	0	0	0	0	0	0	0	0	0	0	0	0	0	0
MEG_2832|Drugs|MLS|23S_rRNA_methyltransferases|ERMF	Drugs	MLS	23S_rRNA_methyltransferases	ERMF	0	0	0	0	0	0	0	0	0	0	0	0	0	0	0	0	0	0	0	0	0	0	0	0	0	0	0	0	0	0	0	0	0	0	0	0	0	0	0	0	0	0	0	0	0
MEG_7243|Drugs|Tetracyclines|Tetracycline_inactivation_enzymes|TETX	Drugs	Tetracyclines	Tetracycline_inactivation_enzymes	TETX	0	0	0	0	0	0	0	0	0	0	0	0	0	0	0	0	0	0	0	0	0	0	0	0	0	0	0	0	0	0	0	0	0	0	0	0	0	0	0	0	0	0	0	0	0
MEG_7238|Drugs|Tetracyclines|Tetracycline_inactivation_enzymes|TETX	Drugs	Tetracyclines	Tetracycline_inactivation_enzymes	TETX	0	0	0	0	0	0	0	0	0	0	0	0	0	0	0	0	0	0	0	0	0	0	0	0	0	0	0	0	0	0	0	0	0	0	0	0	0	0	0	0	0	0	0	0	0
MEG_6630|Drugs|Sulfonamides|Sulfonamide-resistant_dihydropteroate_synthases|SULII	Drugs	Sulfonamides	Sulfonamide-resistant_dihydropteroate_synthases	SULII	0	0	0	0	0	0	0	0	0	0	0	0	0	0	0	0	0	0	0	0	0	0	0	0	0	0	0	0	0	0	0	0	0	0	0	0	0	0	0	0	0	0	0	0	0
MEG_7242|Drugs|Tetracyclines|Tetracycline_inactivation_enzymes|TETX	Drugs	Tetracyclines	Tetracycline_inactivation_enzymes	TETX	0	0	0	0	0	0	0	0	0	0	0	0	0	0	0	0	0	0	0	0	0	0	0	0	0	0	0	0	0	0	0	0	0	0	0	0	0	0	0	0	0	0	0	0	0
MEG_6622|Drugs|Sulfonamides|Sulfonamide-resistant_dihydropteroate_synthases|SULII	Drugs	Sulfonamides	Sulfonamide-resistant_dihydropteroate_synthases	SULII	0	0	0	3.82202	0	0	0	0	0	0	0	0	0	0	0	0	0	0	0	0	0	0	0	0	0	0	0	0	0	0	0	0	0	0	0	0	0	0	0	0	0	0	0	0	0
MEG_1097|Drugs|Aminoglycosides|Aminoglycoside_O-phosphotransferases|APH6	Drugs	Aminoglycosides	Aminoglycoside_O-phosphotransferases	APH6	4.64195	0	0	1.59251	2.16263	0	0	0	0	0	0	0	0	0	0	0	0	0	0	0	0	0	0	0	0	0	0	0	0	0	0	0	0	0	0	0	0	0	0	0	0	0	0	0	0
MEG_7180|Drugs|Tetracyclines|Tetracycline_resistance_ribosomal_protection_proteins|TETQ	Drugs	Tetracyclines	Tetracycline_resistance_ribosomal_protection_proteins	TETQ	0	0	0	0	0	0	0	0	0	0	0	0	0	0	0	0	0	0	0	0	0	0	0	0	0	0	0	0	0	0	0	0	0	0	0	0	0	0	0	0	0	0	0	0	0
MEG_6636|Drugs|Sulfonamides|Sulfonamide-resistant_dihydropteroate_synthases|SULII	Drugs	Sulfonamides	Sulfonamide-resistant_dihydropteroate_synthases	SULII	0	0	0	1.91101	0	0	0	0	0	0	0	0	0	0	0	0	0	0	0	0	0	0	0	0	0	0	0	0	0	0	0	0	0	0	0	0	0	0	0	0	0	0	0	0	0
MEG_6628|Drugs|Sulfonamides|Sulfonamide-resistant_dihydropteroate_synthases|SULII	Drugs	Sulfonamides	Sulfonamide-resistant_dihydropteroate_synthases	SULII	0	0	0	2.86651	0	0	0	0	0	0	0	0	0	0	0	0	0	0	0	0	0	0	0	0	0	0	0	0	0	0	0	0	0	0	0	0	0	0	0	0	0	0	0	0	0
MEG_6625|Drugs|Sulfonamides|Sulfonamide-resistant_dihydropteroate_synthases|SULII	Drugs	Sulfonamides	Sulfonamide-resistant_dihydropteroate_synthases	SULII	0	0	0	2.54801	0	0	0	0	0	0	0	0	0	0	0	0	0	0	0	0	0	0	0	0	0	0	0	0	0	0	0	0	0	0	0	0	0	0	0	0	0	0	0	0	0
MEG_6582|Drugs|Sulfonamides|Sulfonamide-resistant_dihydropteroate_synthases|SULI	Drugs	Sulfonamides	Sulfonamide-resistant_dihydropteroate_synthases	SULI	0	0	0	7.00704	1.92234	0	0	0	0	0	0	0	0	0	0	0	0	0	0	0	0	0	0	0	0	0	0	0	0	0	0	0	0	0	0	0	0	0	0	0	0	0	0	0	0
MEG_6626|Drugs|Sulfonamides|Sulfonamide-resistant_dihydropteroate_synthases|SULII	Drugs	Sulfonamides	Sulfonamide-resistant_dihydropteroate_synthases	SULII	0	0	0	1.91101	0	0	0	0	0	0	0	0	0	0	0	0	0	0	0	0	0	0	0	0	0	0	0	0	0	0	0	0	0	0	0	0	0	0	0	0	0	0	0	0	0
MEG_4073|Drugs|MLS|MLS_resistance_ABC_efflux_pumps|MSRD	Drugs	MLS	MLS_resistance_ABC_efflux_pumps	MSRD	0	0	0	0	0	0	0	0	0	0	0	0	0	0	0	0	0	0	0	0	0	0	0	0	0	0	0	0	0	0	0	0	0	0	0	0	0	0	0	0	0	0	0	0	0
MEG_728|Drugs|betalactams|Class_C_betalactamases|AMPC	Drugs	betalactams	Class_C_betalactamases	AMPC	0	0	0	0	0	0	0	0	0	0	0	0	0	0	0	0	0	0	0	0	0	0	0	0	0	0	0	0	0	0	0	0	0	0	0	0	0	0	0	0	0	0	0	0	0
MEG_6603|Drugs|Sulfonamides|Sulfonamide-resistant_dihydropteroate_synthases|SULI	Drugs	Sulfonamides	Sulfonamide-resistant_dihydropteroate_synthases	SULI	0	0	0	0	0	0	0	0	0	0	0	0	0	0	0	0	0	0	0	0	0	0	0	0	0	0	0	0	0	0	0	0	0	0	0	0	0	0	0	0	0	0	0	0	0
MEG_6610|Drugs|Sulfonamides|Sulfonamide-resistant_dihydropteroate_synthases|SULI	Drugs	Sulfonamides	Sulfonamide-resistant_dihydropteroate_synthases	SULI	0	0	0	0	0	0	0	0	0	0	0	0	0	0	0	0	0	0	0	0	0	0	0	0	0	0	0	0	0	0	0	0	0	0	0	0	0	0	0	0	0	0	0	0	0
MEG_1279|Drugs|betalactams|Class_C_betalactamases|BLAEC	Drugs	betalactams	Class_C_betalactamases	BLAEC	0	0	0	0	0	0	0	0	0	0	0	0	0	0	0	0	0	0	0	0	0	0	0	0	0	0	0	0	0	0	0	0	0	0	0	0	0	0	0	0	0	0	0	0	0
MEG_1280|Drugs|betalactams|Class_C_betalactamases|BLAEC	Drugs	betalactams	Class_C_betalactamases	BLAEC	0	0	0	0	0	0	0	0	0	0	0	0	0	0	0	0	0	0	0	0	0	0	0	0	0	0	0	0	0	0	0	0	0	0	0	0	0	0	0	0	0	0	0	0	0
MEG_6596|Drugs|Sulfonamides|Sulfonamide-resistant_dihydropteroate_synthases|SULI	Drugs	Sulfonamides	Sulfonamide-resistant_dihydropteroate_synthases	SULI	0	0	0	0	0	0	0	0	0	0	0	0	0	0	0	0	0	0	0	0	0	0	0	0	0	0	0	0	0	0	0	0	0	0	0	0	0	0	0	0	0	0	0	0	0
MEG_6591|Drugs|Sulfonamides|Sulfonamide-resistant_dihydropteroate_synthases|SULI	Drugs	Sulfonamides	Sulfonamide-resistant_dihydropteroate_synthases	SULI	0	0	0	0	0	0	0	0	0	0	0	0	0	0	0	0	0	0	0	0	0	0	0	0	0	0	0	0	0	0	0	0	0	0	0	0	0	0	0	0	0	0	0	0	0
MEG_6620|Drugs|Sulfonamides|Sulfonamide-resistant_dihydropteroate_synthases|SULII	Drugs	Sulfonamides	Sulfonamide-resistant_dihydropteroate_synthases	SULII	0	0	0	0	0	0	0	0	0	0	0	0	0	0	0	0	0	0	0	0	0	0	0	0	0	0	0	0	0	0	0	0	0	0	0	0	0	0	0	0	0	0	0	0	0
MEG_6588|Drugs|Sulfonamides|Sulfonamide-resistant_dihydropteroate_synthases|SULI	Drugs	Sulfonamides	Sulfonamide-resistant_dihydropteroate_synthases	SULI	0	0	0	0	0	0	0	0	0	0	0	0	0	0	0	0	0	0	0	0	0	0	0	0	0	0	0	0	0	0	0	0	0	0	0	0	0	0	0	0	0	0	0	0	0
MEG_6609|Drugs|Sulfonamides|Sulfonamide-resistant_dihydropteroate_synthases|SULI	Drugs	Sulfonamides	Sulfonamide-resistant_dihydropteroate_synthases	SULI	0	0	0	0	0	0	0	0	0	0	0	0	0	0	0	0	0	0	0	0	0	0	0	0	0	0	0	0	0	0	0	0	0	0	0	0	0	0	0	0	0	0	0	0	0
MEG_1277|Drugs|betalactams|Class_C_betalactamases|BLAEC	Drugs	betalactams	Class_C_betalactamases	BLAEC	2.59949	0	0	0	0	0	0	0	0	0	0	0	0	0	0	0	0	0	0	0	0	0	0	0	0	0	0	0	0	0	0	0	0	0	0	0	0	0	0	0	0	0	0	0	0
MEG_6589|Drugs|Sulfonamides|Sulfonamide-resistant_dihydropteroate_synthases|SULI	Drugs	Sulfonamides	Sulfonamide-resistant_dihydropteroate_synthases	SULI	0	0	0	0	0	0	0	0	0	0	0	0	0	0	0	0	0	0	0	0	0	0	0	0	0	0	0	0	0	0	0	0	0	0	0	0	0	0	0	0	0	0	0	0	0
MEG_1283|Drugs|betalactams|Class_C_betalactamases|BLAEC	Drugs	betalactams	Class_C_betalactamases	BLAEC	0	0	0	0	0	0	0	0	0	0	0	0	0	0	0	0	0	0	0	0	0	0	0	0	0	0	0	0	0	0	0	0	0	0	0	0	0	0	0	0	0	0	0	0	0
MEG_7328|Drugs|Cationic_antimicrobial_peptides|Lipid_A_modification|UGD	Drugs	Cationic_antimicrobial_peptides	Lipid_A_modification	UGD	2.59949	0	0	0	0	0	0	0	0	0	0	0	0	0	0	0	0	0	0	0	0	0	0	0	0	0	0	0	0	0	0	0	0	0	0	0	0	0	0	0	0	0	0	0	0
MEG_6598|Drugs|Sulfonamides|Sulfonamide-resistant_dihydropteroate_synthases|SULI	Drugs	Sulfonamides	Sulfonamide-resistant_dihydropteroate_synthases	SULI	0	0	0	0	0	0	0	0	0	0	0	0	0	0	0	0	0	0	0	0	0	0	0	0	0	0	0	0	0	0	0	0	0	0	0	0	0	0	0	0	0	0	0	0	0
MEG_1281|Drugs|betalactams|Class_C_betalactamases|BLAEC	Drugs	betalactams	Class_C_betalactamases	BLAEC	0	0	0	0	0	0	0	0	0	0	0	0	0	0	0	0	0	0	0	0	0	0	0	0	0	0	0	0	0	0	0	0	0	0	0	0	0	0	0	0	0	0	0	0	0
MEG_6601|Drugs|Sulfonamides|Sulfonamide-resistant_dihydropteroate_synthases|SULI	Drugs	Sulfonamides	Sulfonamide-resistant_dihydropteroate_synthases	SULI	0	0	0	0	0	0	0	0	0	0	0	0	0	0	0	0	0	0	0	0	0	0	0	0	0	0	0	0	0	0	0	0	0	0	0	0	0	0	0	0	0	0	0	0	0
MEG_1278|Drugs|betalactams|Class_C_betalactamases|BLAEC	Drugs	betalactams	Class_C_betalactamases	BLAEC	0	0	0	0	0	0	0	0	0	0	0	0	0	0	0	0	0	0	0	0	0	0	0	0	0	0	0	0	0	0	0	0	0	0	0	0	0	0	0	0	0	0	0	0	0
MEG_6593|Drugs|Sulfonamides|Sulfonamide-resistant_dihydropteroate_synthases|SULI	Drugs	Sulfonamides	Sulfonamide-resistant_dihydropteroate_synthases	SULI	0	0	0	0	0	0	0	0	0	0	0	0	0	0	0	0	0	0	0	0	0	0	0	0	0	0	0	0	0	0	0	0	0	0	0	0	0	0	0	0	0	0	0	0	0
MEG_6592|Drugs|Sulfonamides|Sulfonamide-resistant_dihydropteroate_synthases|SULI	Drugs	Sulfonamides	Sulfonamide-resistant_dihydropteroate_synthases	SULI	0	0	0	0	0	0	0	0	0	0	0	0	0	0	0	0	0	0	0	0	0	0	0	0	0	0	0	0	0	0	0	0	0	0	0	0	0	0	0	0	0	0	0	0	0
MEG_6607|Drugs|Sulfonamides|Sulfonamide-resistant_dihydropteroate_synthases|SULI	Drugs	Sulfonamides	Sulfonamide-resistant_dihydropteroate_synthases	SULI	0	0	0	0	0	0	0	0	0	0	0	0	0	0	0	0	0	0	0	0	0	0	0	0	0	0	0	0	0	0	0	0	0	0	0	0	0	0	0	0	0	0	0	0	0
MEG_1275|Drugs|betalactams|Class_C_betalactamases|BLAEC	Drugs	betalactams	Class_C_betalactamases	BLAEC	2.41381	0	0	4.77752	0	0	0	0	0	0	0	0	0	0	0	0	0	0	0	0	0	0	0	0	0	0	0	0	0	0	0	0	0	0	0	0	0	0	0	0	0	0	0	0	0
MEG_6584|Drugs|Sulfonamides|Sulfonamide-resistant_dihydropteroate_synthases|SULI	Drugs	Sulfonamides	Sulfonamide-resistant_dihydropteroate_synthases	SULI	0	0	0	0	0	0	0	0	0	0	0	0	0	0	0	0	0	0	0	0	0	0	0	0	0	0	0	0	0	0	0	0	0	0	0	0	0	0	0	0	0	0	0	0	0
MEG_6615|Drugs|Sulfonamides|Sulfonamide-resistant_dihydropteroate_synthases|SULI	Drugs	Sulfonamides	Sulfonamide-resistant_dihydropteroate_synthases	SULI	0	0	0	0	0	0	0	0	0	0	0	0	0	0	0	0	0	0	0	0	0	0	0	0	0	0	0	0	0	0	0	0	0	0	0	0	0	0	0	0	0	0	0	0	0
MEG_1282|Drugs|betalactams|Class_C_betalactamases|BLAEC	Drugs	betalactams	Class_C_betalactamases	BLAEC	0	0	0	0	0	0	0	0	0	0	0	0	0	0	0	0	0	0	0	0	0	0	0	0	0	0	0	0	0	0	0	0	0	0	0	0	0	0	0	0	0	0	0	0	0
MEG_6611|Drugs|Sulfonamides|Sulfonamide-resistant_dihydropteroate_synthases|SULI	Drugs	Sulfonamides	Sulfonamide-resistant_dihydropteroate_synthases	SULI	0	0	0	0	0	0	0	0	0	0	0	0	0	0	0	0	0	0	0	0	0	0	0	0	0	0	0	0	0	0	0	0	0	0	0	0	0	0	0	0	0	0	0	0	0
MEG_5409|Drugs|betalactams|Penicillin_binding_protein|PBP4B	Drugs	betalactams	Penicillin_binding_protein	PBP4B	0	0	0	0	0	0	0	0	0	0	0	0	0	0	0	0	0	0	0	0	0	0	0	0	0	0	0	0	0	0	0	0	0	0	0	0	0	0	0	0	0	0	0	0	0
MEG_6612|Drugs|Sulfonamides|Sulfonamide-resistant_dihydropteroate_synthases|SULI	Drugs	Sulfonamides	Sulfonamide-resistant_dihydropteroate_synthases	SULI	0	0	0	0	0	0	0	0	0	0	0	0	0	0	0	0	0	0	0	0	0	0	0	0	0	0	0	0	0	0	0	0	0	0	0	0	0	0	0	0	0	0	0	0	0
MEG_6616|Drugs|Sulfonamides|Sulfonamide-resistant_dihydropteroate_synthases|SULI	Drugs	Sulfonamides	Sulfonamide-resistant_dihydropteroate_synthases	SULI	0	0	0	0	0	0	0	0	0	0	0	0	0	0	0	0	0	0	0	0	0	0	0	0	0	0	0	0	0	0	0	0	0	0	0	0	0	0	0	0	0	0	0	0	0
MEG_6586|Drugs|Sulfonamides|Sulfonamide-resistant_dihydropteroate_synthases|SULI	Drugs	Sulfonamides	Sulfonamide-resistant_dihydropteroate_synthases	SULI	0	0	0	0	0	0	0	0	0	0	0	0	0	0	0	0	0	0	0	0	0	0	0	0	0	0	0	0	0	0	0	0	0	0	0	0	0	0	0	0	0	0	0	0	0
MEG_6587|Drugs|Sulfonamides|Sulfonamide-resistant_dihydropteroate_synthases|SULI	Drugs	Sulfonamides	Sulfonamide-resistant_dihydropteroate_synthases	SULI	0	0	0	0	0	0	0	0	0	0	0	0	0	0	0	0	0	0	0	0	0	0	0	0	0	0	0	0	0	0	0	0	0	0	0	0	0	0	0	0	0	0	0	0	0
MEG_6597|Drugs|Sulfonamides|Sulfonamide-resistant_dihydropteroate_synthases|SULI	Drugs	Sulfonamides	Sulfonamide-resistant_dihydropteroate_synthases	SULI	0	0	0	0	0	0	0	0	0	0	0	0	0	0	0	0	0	0	0	0	0	0	0	0	0	0	0	0	0	0	0	0	0	0	0	0	0	0	0	0	0	0	0	0	0
MEG_6613|Drugs|Sulfonamides|Sulfonamide-resistant_dihydropteroate_synthases|SULI	Drugs	Sulfonamides	Sulfonamide-resistant_dihydropteroate_synthases	SULI	0	0	0	0	0	0	0	0	0	0	0	0	0	0	0	0	0	0	0	0	0	0	0	0	0	0	0	0	0	0	0	0	0	0	0	0	0	0	0	0	0	0	0	0	0
MEG_1276|Drugs|betalactams|Class_C_betalactamases|BLAEC	Drugs	betalactams	Class_C_betalactamases	BLAEC	0	0	0	0	0	0	0	0	0	0	0	0	0	0	0	0	0	0	0	0	0	0	0	0	0	0	0	0	0	0	0	0	0	0	0	0	0	0	0	0	0	0	0	0	0
MEG_6580|Drugs|Sulfonamides|Sulfonamide-resistant_dihydropteroate_synthases|SULI	Drugs	Sulfonamides	Sulfonamide-resistant_dihydropteroate_synthases	SULI	0	0	0	0	0	0	0	0	0	0	0	0	0	0	0	0	0	0	0	0	0	0	0	0	0	0	0	0	0	0	0	0	0	0	0	0	0	0	0	0	0	0	0	0	0
MEG_6590|Drugs|Sulfonamides|Sulfonamide-resistant_dihydropteroate_synthases|SULI	Drugs	Sulfonamides	Sulfonamide-resistant_dihydropteroate_synthases	SULI	0	0	0	0	0	0	0	0	0	0	0	0	0	0	0	0	0	0	0	0	0	0	0	0	0	0	0	0	0	0	0	0	0	0	0	0	0	0	0	0	0	0	0	0	0
MEG_6614|Drugs|Sulfonamides|Sulfonamide-resistant_dihydropteroate_synthases|SULI	Drugs	Sulfonamides	Sulfonamide-resistant_dihydropteroate_synthases	SULI	0	0	0	0	0	0	0	0	0	0	0	0	0	0	0	0	0	0	0	0	0	0	0	0	0	0	0	0	0	0	0	0	0	0	0	0	0	0	0	0	0	0	0	0	0
MEG_6635|Drugs|Sulfonamides|Sulfonamide-resistant_dihydropteroate_synthases|SULII	Drugs	Sulfonamides	Sulfonamide-resistant_dihydropteroate_synthases	SULII	0	0	0	0	0	0	0	0	0	0	0	0	0	0	0	0	0	0	0	0	0	0	0	0	0	0	0	0	0	0	0	0	0	0	0	0	0	0	0	0	0	0	0	0	0
MEG_6623|Drugs|Sulfonamides|Sulfonamide-resistant_dihydropteroate_synthases|SULII	Drugs	Sulfonamides	Sulfonamide-resistant_dihydropteroate_synthases	SULII	0	0	0	0	0	0	0	0	0	0	0	0	0	0	0	0	0	0	0	0	0	0	0	0	0	0	0	0	0	0	0	0	0	0	0	0	0	0	0	0	0	0	0	0	0
MEG_1284|Drugs|betalactams|Class_C_betalactamases|BLAEC	Drugs	betalactams	Class_C_betalactamases	BLAEC	0	0	0	0	0	0	0	0	0	0	0	0	0	0	0	0	0	0	0	0	0	0	0	0	0	0	0	0	0	0	0	0	0	0	0	0	0	0	0	0	0	0	0	0	0
MEG_6594|Drugs|Sulfonamides|Sulfonamide-resistant_dihydropteroate_synthases|SULI	Drugs	Sulfonamides	Sulfonamide-resistant_dihydropteroate_synthases	SULI	0	0	0	0	0	0	0	0	0	0	0	0	0	0	0	0	0	0	0	0	0	0	0	0	0	0	0	0	0	0	0	0	0	0	0	0	0	0	0	0	0	0	0	0	0
MEG_7226|Drugs|Tetracyclines|Tetracycline_resistance_ribosomal_protection_proteins|TETW	Drugs	Tetracyclines	Tetracycline_resistance_ribosomal_protection_proteins	TETW	0	0	0	0	0	0	0	0	0	0	0	0	0	0	0	0	0	0	0	0	0	0	0	0	0	0	0	0	0	0	0	0	0	0	0	0	0	0	0	0	0	0	0	0	0
MEG_6583|Drugs|Sulfonamides|Sulfonamide-resistant_dihydropteroate_synthases|SULI	Drugs	Sulfonamides	Sulfonamide-resistant_dihydropteroate_synthases	SULI	0	0	0	0	0	0	0	0	0	0	0	0	0	0	0	0	0	0	0	0	0	0	0	0	0	0	0	0	0	0	0	0	0	0	0	0	0	0	0	0	0	0	0	0	0
MEG_6579|Drugs|Sulfonamides|Sulfonamide-resistant_dihydropteroate_synthases|SULI	Drugs	Sulfonamides	Sulfonamide-resistant_dihydropteroate_synthases	SULI	0	0	0	0	0	0	0	0	0	0	0	0	0	0	0	0	0	0	0	0	0	0	0	0	0	0	0	0	0	0	0	0	0	0	0	0	0	0	0	0	0	0	0	0	0
MEG_6608|Drugs|Sulfonamides|Sulfonamide-resistant_dihydropteroate_synthases|SULI	Drugs	Sulfonamides	Sulfonamide-resistant_dihydropteroate_synthases	SULI	0	0	0	0	0	0	0	0	0	0	0	0	0	0	0	0	0	0	0	0	0	0	0	0	0	0	0	0	0	0	0	0	0	0	0	0	0	0	0	0	0	0	0	0	0
MEG_6604|Drugs|Sulfonamides|Sulfonamide-resistant_dihydropteroate_synthases|SULI	Drugs	Sulfonamides	Sulfonamide-resistant_dihydropteroate_synthases	SULI	0	0	0	0	0	0	0	0	0	0	0	0	0	0	0	0	0	0	0	0	0	0	0	0	0	0	0	0	0	0	0	0	0	0	0	0	0	0	0	0	0	0	0	0	0
MEG_6581|Drugs|Sulfonamides|Sulfonamide-resistant_dihydropteroate_synthases|SULI	Drugs	Sulfonamides	Sulfonamide-resistant_dihydropteroate_synthases	SULI	0	0	0	0	0	0	0	0	0	0	0	0	0	0	0	0	0	0	0	0	0	0	0	0	0	0	0	0	0	0	0	0	0	0	0	0	0	0	0	0	0	0	0	0	0
MEG_6595|Drugs|Sulfonamides|Sulfonamide-resistant_dihydropteroate_synthases|SULI	Drugs	Sulfonamides	Sulfonamide-resistant_dihydropteroate_synthases	SULI	0	0	0	0	0	0	0	0	0	0	0	0	0	0	0	0	0	0	0	0	0	0	0	0	0	0	0	0	0	0	0	0	0	0	0	0	0	0	0	0	0	0	0	0	0
MEG_6600|Drugs|Sulfonamides|Sulfonamide-resistant_dihydropteroate_synthases|SULI	Drugs	Sulfonamides	Sulfonamide-resistant_dihydropteroate_synthases	SULI	0	0	0	0	0	0	0	0	0	0	0	0	0	0	0	0	0	0	0	0	0	0	0	0	0	0	0	0	0	0	0	0	0	0	0	0	0	0	0	0	0	0	0	0	0
MEG_6606|Drugs|Sulfonamides|Sulfonamide-resistant_dihydropteroate_synthases|SULI	Drugs	Sulfonamides	Sulfonamide-resistant_dihydropteroate_synthases	SULI	0	0	0	0	0	0	0	0	0	0	0	0	0	0	0	0	0	0	0	0	0	0	0	0	0	0	0	0	0	0	0	0	0	0	0	0	0	0	0	0	0	0	0	0	0
MEG_743|Drugs|Aminoglycosides|Aminoglycoside_O-nucleotidyltransferases|ANT2-DPRIME	Drugs	Aminoglycosides	Aminoglycoside_O-nucleotidyltransferases	ANT2-DPRIME	0.742712	0	0	5.73303	0	0	0	0	0	0	0	0	0	0	0	0	0	0	0	0	0	0	0	0	0	0	0	0	0	0	0	0	0	0	0	0	0	0	0	0	0	0	0	0	0
MEG_757|Drugs|Aminoglycosides|Aminoglycoside_O-nucleotidyltransferases|ANT2-DPRIME	Drugs	Aminoglycosides	Aminoglycoside_O-nucleotidyltransferases	ANT2-DPRIME	1.11407	0	0	4.77752	0	0	0	0	0	0	0	0	0	0	0	0	0	0	0	0	0	0	0	0	0	0	0	0	0	0	0	0	0	0	0	0	0	0	0	0	0	0	0	0	0
MEG_754|Drugs|Aminoglycosides|Aminoglycoside_O-nucleotidyltransferases|ANT2-DPRIME	Drugs	Aminoglycosides	Aminoglycoside_O-nucleotidyltransferases	ANT2-DPRIME	0.92839	0	0	3.50352	0	0	0	0	0	0	0	0	0	0	0	0	0	0	0	0	0	0	0	0	0	0	0	0	0	0	0	0	0	0	0	0	0	0	0	0	0	0	0	0	0
MEG_172|Drugs|Aminoglycosides|Aminoglycoside_N-acetyltransferases|AAC6-PRIME	Drugs	Aminoglycosides	Aminoglycoside_N-acetyltransferases	AAC6-PRIME	2.59949	0	0	2.22951	0	0	0	0	0	0	0	0	0	0	0	0	0	0	0	0	0	0	0	0	0	0	0	0	0	0	0	0	0	0	0	0	0	0	0	0	0	0	0	0	0
MEG_6637|Drugs|Sulfonamides|Sulfonamide-resistant_dihydropteroate_synthases|SULII	Drugs	Sulfonamides	Sulfonamide-resistant_dihydropteroate_synthases	SULII	1.6711	0	0	7.00704	0	0	0	0	0	0	0	0	0	0	0	0	0	0	0	0	0	0	0	0	0	0	0	0	0	0	0	0	0	0	0	0	0	0	0	0	0	0	0	0	0
MEG_1084|Drugs|Aminoglycosides|Aminoglycoside_O-phosphotransferases|APH6	Drugs	Aminoglycosides	Aminoglycoside_O-phosphotransferases	APH6	4.2706	0	0	4.45902	2.16263	3.16765	0	0	0	0	0	0	0	0	0	0	0	0	0	0	0	0	0	0	0	0	0	0	0	0	0	0	0	0	0	0	0	0	0	0	0	0	0	0	0
MEG_751|Drugs|Aminoglycosides|Aminoglycoside_O-nucleotidyltransferases|ANT2-DPRIME	Drugs	Aminoglycosides	Aminoglycoside_O-nucleotidyltransferases	ANT2-DPRIME	0.557034	0	0	2.22951	0	0	0	0	0	0	0	0	0	0	0	0	0	0	0	0	0	0	0	0	0	0	0	0	0	0	0	0	0	0	0	0	0	0	0	0	0	0	0	0	0
MEG_6633|Drugs|Sulfonamides|Sulfonamide-resistant_dihydropteroate_synthases|SULII	Drugs	Sulfonamides	Sulfonamide-resistant_dihydropteroate_synthases	SULII	0	0	0	3.82202	0	0	0	0	0	0	0	0	0	0	0	0	0	0	0	0	0	0	0	0	0	0	0	0	0	0	0	0	0	0	0	0	0	0	0	0	0	0	0	0	0
MEG_6621|Drugs|Sulfonamides|Sulfonamide-resistant_dihydropteroate_synthases|SULII	Drugs	Sulfonamides	Sulfonamide-resistant_dihydropteroate_synthases	SULII	0	0	0	3.18502	0	0	0	0	0	0	0	0	0	0	0	0	0	0	0	0	0	0	0	0	0	0	0	0	0	0	0	0	0	0	0	0	0	0	0	0	0	0	0	0	0
MEG_1041|Drugs|Aminoglycosides|Aminoglycoside_O-phosphotransferases|APH3-DPRIME	Drugs	Aminoglycosides	Aminoglycoside_O-phosphotransferases	APH3-DPRIME	0	0	0	4.77752	0	0	0	0	0	0	0	0	0	0	0	0	0	0	0	0	0	0	0	0	0	0	0	0	0	0	0	0	0	0	0	0	0	0	0	0	0	0	0	0	0
MEG_6627|Drugs|Sulfonamides|Sulfonamide-resistant_dihydropteroate_synthases|SULII	Drugs	Sulfonamides	Sulfonamide-resistant_dihydropteroate_synthases	SULII	0	0	0	3.18502	0	0	0	0	0	0	0	0	0	0	0	0	0	0	0	0	0	0	0	0	0	0	0	0	0	0	0	0	0	0	0	0	0	0	0	0	0	0	0	0	0
MEG_736|Drugs|Aminoglycosides|Aminoglycoside_O-nucleotidyltransferases|ANT2-DPRIME	Drugs	Aminoglycosides	Aminoglycoside_O-nucleotidyltransferases	ANT2-DPRIME	0	0	0	3.50352	0	0	0	0	0	0	0	0	0	0	0	0	0	0	0	0	0	0	0	0	0	0	0	0	0	0	0	0	0	0	0	0	0	0	0	0	0	0	0	0	0
MEG_1061|Drugs|Aminoglycosides|Aminoglycoside_O-phosphotransferases|APH3-PRIME	Drugs	Aminoglycosides	Aminoglycoside_O-phosphotransferases	APH3-PRIME	0	0	0	7.00704	0	0	0	0	0	0	0	0	0	0	0	0	0	0	0	0	0	0	0	0	0	0	0	0	0	0	0	0	0	0	0	0	0	0	0	0	0	0	0	0	0
MEG_6624|Drugs|Sulfonamides|Sulfonamide-resistant_dihydropteroate_synthases|SULII	Drugs	Sulfonamides	Sulfonamide-resistant_dihydropteroate_synthases	SULII	0	0	0	3.18502	0	0	0	0	0	0	0	0	0	0	0	0	0	0	0	0	0	0	0	0	0	0	0	0	0	0	0	0	0	0	0	0	0	0	0	0	0	0	0	0	0
MEG_739|Drugs|Aminoglycosides|Aminoglycoside_O-nucleotidyltransferases|ANT2-DPRIME	Drugs	Aminoglycosides	Aminoglycoside_O-nucleotidyltransferases	ANT2-DPRIME	0	0	0	3.18502	0	0	0	0	0	0	0	0	0	0	0	0	0	0	0	0	0	0	0	0	0	0	0	0	0	0	0	0	0	0	0	0	0	0	0	0	0	0	0	0	0
MEG_1025|Drugs|Aminoglycosides|Aminoglycoside_O-phosphotransferases|APH3-DPRIME	Drugs	Aminoglycosides	Aminoglycoside_O-phosphotransferases	APH3-DPRIME	0	0	0	5.09603	0	0	0	0	0	0	0	0	0	0	0	0	0	0	0	0	0	0	0	0	0	0	0	0	0	0	0	0	0	0	0	0	0	0	0	0	0	0	0	0	0
MEG_6617|Drugs|Sulfonamides|Sulfonamide-resistant_dihydropteroate_synthases|SULII	Drugs	Sulfonamides	Sulfonamide-resistant_dihydropteroate_synthases	SULII	0	0	0	3.18502	0	0	0	0	0	0	0	0	0	0	0	0	0	0	0	0	0	0	0	0	0	0	0	0	0	0	0	0	0	0	0	0	0	0	0	0	0	0	0	0	0
MEG_2503|Drugs|Trimethoprim|Dihydrofolate_reductase|DFRA	Drugs	Trimethoprim	Dihydrofolate_reductase	DFRA	0	0	0	3.18502	0	0	0	0	0	0	0	0	0	0	0	0	0	0	0	0	0	0	0	0	0	0	0	0	0	0	0	0	0	0	0	0	0	0	0	0	0	0	0	0	0
MEG_2577|Drugs|Trimethoprim|Dihydrofolate_reductase|DFRE	Drugs	Trimethoprim	Dihydrofolate_reductase	DFRE	0	0	0	0	5.04614	0	0	0	0	0	0	0	0	0	0	0	0	0	0	0	0	0	0	0	0	0	0	0	0	0	0	0	0	0	0	0	0	0	0	0	0	0	0	0	0
MEG_4323|Drugs|Multi-drug_resistance|Multi-drug_ABC_efflux_pumps|OPTRA	Drugs	Multi-drug_resistance	Multi-drug_ABC_efflux_pumps	OPTRA	0	0	0	0	5.04614	0	0	0	0	0	0	0	0	0	0	0	0	0	0	0	0	0	0	0	0	0	0	0	0	0	0	0	0	0	0	0	0	0	0	0	0	0	0	0	0
MEG_3645|Drugs|MLS|MLS_resistance_ABC_efflux_pumps|LSA	Drugs	MLS	MLS_resistance_ABC_efflux_pumps	LSA	0	0	0	0	4.80585	0	0	0	0	0	0	0	0	0	0	0	0	0	0	0	0	0	0	0	0	0	0	0	0	0	0	0	0	0	0	0	0	0	0	0	0	0	0	0	0
[truncated: 33 more columns]

## Sheet: ARG_RICHNESS
	Richness
D3_CON_R1	55
D3_PFA_R1	20
D3_AGP_R1	25
D3_AGP+PFA_R1	79
D3_AB_R1	49
D3_AB+PFA_R1	30
D14_CON_R1	60
D14_CON_R2	52
D14_CON_R3	36
D14_CON_R4	36
D14_PFA_R1	70
D14_PFA_R2	46
D14_PFA_R3	44
D14_PFA_R4	35
D14_AGP_R1	39
D14_AGP_R2	47
D14_AGP_R3	30
D14_AGP_R4	56
D14_AGP+PFA_R1	66
D14_AGP+PFA_R2	50
D14_AGP+PFA_R3	52
D14_AGP+PFA_R4	50
D14_AB_R1	55
D14_AB_R2	31
D14_AB_R3	67
D14_AB_R4	44
D14_AB+PFA_R1	34
D14_AB+PFA_R2	42
D14_AB+PFA_R3	25
D14_AB+PFA_R4	35
D21_CON_R1	52
D21_CON_R2	12
D21_CON_R3	48
D21_CON_R4	31
D21_PFA_R1	60
D21_PFA_R2	37
D21_PFA_R3	53
D21_PFA_R4	54
D21_AGP_R1	46
D21_AGP_R2	71
D21_AGP_R3	37
D21_AGP_R4	35
D21_AGP+PFA_R1	55
D21_AGP+PFA_R2	41
D21_AGP+PFA_R3	77
D21_AGP+PFA_R4	44
D21_AB_R1	44
D21_AB_R2	32
D21_AB_R3	64
D21_AB_R4	35
D21_AB+PFA_R1	42
D21_AB+PFA_R2	70
D21_AB+PFA_R3	29
D21_AB+PFA_R4	58
D35_CON_R1	44
D35_CON_R2	58
D35_CON_R3	74
D35_CON_R4	49
D35_PFA_R1	49
D35_PFA_R2	57
D35_PFA_R3	23
D35_PFA_R4	45
D35_AGP_R1	94
D35_AGP_R2	64
D35_AGP_R3	47
D35_AGP_R4	19
D35_AGP+PFA_R1	52
D35_AGP+PFA_R2	97
D35_AGP+PFA_R3	93
D35_AGP+PFA_R4	64
D35_AB_R1	55
D35_AB_R2	69
D35_AB_R3	45
D35_AB_R4	48
D35_AB+PFA_R1	34
D35_AB+PFA_R2	87
D35_AB+PFA_R3	60
D35_AB+PFA_R4	57

## Sheet: ARG_DIVERSITY
	Timepoint	Treatment	Diversity
D3_CON_R1	D3	D3	4.21512
D3_PFA_R1	D3	D3	4.12287
D3_AGP_R1	D3	D3	2.39148
D3_AGP+PFA_R1	D3	D3	4.0942
D3_AB_R1	D3	D3	3.82137
D3_AB+PFA_R1	D3	D3	3.5082
D14_CON_R1	D14	CON	3.23653
D14_CON_R2	D14	CON	4.86495
D14_CON_R3	D14	CON	3.77442
D14_CON_R4	D14	CON	4.13027
D14_PFA_R1	D14	PFA	3.98211
D14_PFA_R2	D14	PFA	4.39935
D14_PFA_R3	D14	PFA	4.13136
D14_PFA_R4	D14	PFA	4.60515
D14_AGP_R1	D14	AGP	4.38125
D14_AGP_R2	D14	AGP	4.56368
D14_AGP_R3	D14	AGP	4.00304
D14_AGP_R4	D14	AGP	4.92368
D14_AGP+PFA_R1	D14	AGP+PFA	4.95378
D14_AGP+PFA_R2	D14	AGP+PFA	3.87722
D14_AGP+PFA_R3	D14	AGP+PFA	4.52502
D14_AGP+PFA_R4	D14	AGP+PFA	4.74582
D14_AB_R1	D14	AB	4.56138
D14_AB_R2	D14	AB	4.29291
D14_AB_R3	D14	AB	4.88739
D14_AB_R4	D14	AB	4.60746
D14_AB+PFA_R1	D14	AB+PFA	3.56297
D14_AB+PFA_R2	D14	AB+PFA	4.4271
D14_AB+PFA_R3	D14	AB+PFA	4.17676
D14_AB+PFA_R4	D14	AB+PFA	4.20017
D21_CON_R1	D21	CON	4.19894
D21_CON_R2	D21	CON	3.23949
D21_CON_R3	D21	CON	4.67641
D21_CON_R4	D21	CON	3.92564
D21_PFA_R1	D21	PFA	4.86466
D21_PFA_R2	D21	PFA	4.29112
D21_PFA_R3	D21	PFA	4.66124
D21_PFA_R4	D21	PFA	4.78916
D21_AGP_R1	D21	AGP	4.72266
D21_AGP_R2	D21	AGP	3.98797
D21_AGP_R3	D21	AGP	3.83283
D21_AGP_R4	D21	AGP	4.15223
D21_AGP+PFA_R1	D21	AGP+PFA	4.76376
D21_AGP+PFA_R2	D21	AGP+PFA	4.14607
D21_AGP+PFA_R3	D21	AGP+PFA	5.13749
D21_AGP+PFA_R4	D21	AGP+PFA	3.064
D21_AB_R1	D21	AB	4.42626
D21_AB_R2	D21	AB	3.59908
D21_AB_R3	D21	AB	4.88485
D21_AB_R4	D21	AB	4.36051
D21_AB+PFA_R1	D21	AB+PFA	4.51356
D21_AB+PFA_R2	D21	AB+PFA	4.75953
D21_AB+PFA_R3	D21	AB+PFA	3.84349
D21_AB+PFA_R4	D21	AB+PFA	4.72292
D35_CON_R1	D35	CON	4.53815
D35_CON_R2	D35	CON	4.85933
D35_CON_R3	D35	CON	5.09107
D35_CON_R4	D35	CON	4.29742
D35_PFA_R1	D35	PFA	3.69575
D35_PFA_R2	D35	PFA	4.57452
D35_PFA_R3	D35	PFA	3.56765
D35_PFA_R4	D35	PFA	4.25854
D35_AGP_R1	D35	AGP	5.2595
D35_AGP_R2	D35	AGP	4.45812
D35_AGP_R3	D35	AGP	3.925
D35_AGP_R4	D35	AGP	3.7255
D35_AGP+PFA_R1	D35	AGP+PFA	4.80844
D35_AGP+PFA_R2	D35	AGP+PFA	3.73896
D35_AGP+PFA_R3	D35	AGP+PFA	3.68442
D35_AGP+PFA_R4	D35	AGP+PFA	4.36251
D35_AB_R1	D35	AB	4.64689
D35_AB_R2	D35	AB	5.08427
D35_AB_R3	D35	AB	4.56664
D35_AB_R4	D35	AB	4.31306
D35_AB+PFA_R1	D35	AB+PFA	4.24504
D35_AB+PFA_R2	D35	AB+PFA	5.47034
D35_AB+PFA_R3	D35	AB+PFA	4.91476
D35_AB+PFA_R4	D35	AB+PFA	4.8318

## Sheet: ARG_NMDS_PERMANOVA
Group_1	Group_2	P_value	<0.05
D14_AGP	D14_AB+PFA	0.191	FAIL
D14_AGP	D14_CON	0.056	FAIL
D14_AGP	D14_PFA	0.533	FAIL
D14_AGP	D14_AGP+PFA	0.507	FAIL
D14_AGP	D14_AB	0.054	FAIL
D21_CON	D21_AB	0.182	FAIL
D21_CON	D21_AGP+PFA	0.182	FAIL
D21_CON	D21_AGP	0.611	FAIL
D21_CON	D21_AB+PFA	0.025	PASS
D21_CON	D21_PFA	0.652	FAIL
D21_AB	D21_AGP+PFA	0.294	FAIL
D21_AB	D21_AGP	0.246	FAIL
D21_AB	D21_AB+PFA	0.438	FAIL
D21_AB	D21_PFA	0.199	FAIL
D35_CON	D35_AB	0.348	FAIL
D35_CON	D35_AGP	0.366	FAIL
D35_CON	D35_AGP+PFA	0.319	FAIL
D35_CON	D35_AB+PFA	0.062	FAIL
D35_CON	D35_PFA	0.948	FAIL
D35_AB	D35_AGP	0.626	FAIL
D35_AB	D35_AGP+PFA	0.667	FAIL
D35_AB	D35_AB+PFA	0.551	FAIL
D35_AB	D35_PFA	0.515	FAIL
D14_AB+PFA	D14_CON	0.901	FAIL
D14_AB+PFA	D14_PFA	0.021	PASS
D14_AB+PFA	D14_AGP+PFA	0.84	FAIL
D14_AB+PFA	D14_AB	0.437	FAIL
D21_AGP+PFA	D21_AGP	0.73	FAIL
D21_AGP+PFA	D21_AB+PFA	0.08	FAIL
D21_AGP+PFA	D21_PFA	0.528	FAIL
D14_CON	D14_PFA	0.057	FAIL
D14_CON	D14_AGP+PFA	0.422	FAIL
D14_CON	D14_AB	0.324	FAIL
D14_PFA	D14_AGP+PFA	0.058	FAIL
D14_PFA	D14_AB	0.17	FAIL
D35_AGP	D35_AGP+PFA	0.54	FAIL
D35_AGP	D35_AB+PFA	0.306	FAIL
D35_AGP	D35_PFA	0.275	FAIL
D35_AGP+PFA	D35_AB+PFA	0.567	FAIL
D35_AGP+PFA	D35_PFA	0.331	FAIL
D21_AGP	D21_AB+PFA	0.081	FAIL
D21_AGP	D21_PFA	0.917	FAIL
D35_AB+PFA	D35_PFA	0.175	FAIL
D14_AGP+PFA	D14_AB	0.756	FAIL
D21_AB+PFA	D21_PFA	0.122	FAIL

## Sheet: ARG_NMDS_DISIMILARITY
	Condition	Timepoint	X	Y
D14_CON_R1	D14_CON	D14	-0.3798859619439942	0.18124253386704528
D14_CON_R2	D14_CON	D14	0.030081818263743343	-0.31831390171789875
D14_CON_R3	D14_CON	D14	-0.4203808954858823	0.018867595020993833
D14_CON_R4	D14_CON	D14	-0.045348323436886065	-0.3761435420280916
D14_PFA_R1	D14_PFA	D14	-0.3566242230287365	0.3325275160783337
D14_PFA_R2	D14_PFA	D14	0.007663242434439908	0.3268594341675881
D14_PFA_R3	D14_PFA	D14	0.10013931668298467	-0.11647022029640437
D14_PFA_R4	D14_PFA	D14	0.21764053148275259	0.4013446984043375
D14_AGP_R1	D14_AGP	D14	-0.396397775402674	0.2914089969312687
D14_AGP_R2	D14_AGP	D14	0.4164879082751247	0.20838245019845933
D14_AGP_R3	D14_AGP	D14	-0.31592341536167645	0.26453181055878117
D14_AGP_R4	D14_AGP	D14	-0.2369400617448662	-0.2703548764517082
D14_AGP+PFA_R1	D14_AGP+PFA	D14	-0.299264227817139	-0.12237539363621189
D14_AGP+PFA_R2	D14_AGP+PFA	D14	0.09456317958381773	0.3839389986022431
D14_AGP+PFA_R3	D14_AGP+PFA	D14	-0.17051273860116178	-0.24489844139531147
D14_AGP+PFA_R4	D14_AGP+PFA	D14	0.3894903897980057	-0.35302256565962326
D14_AB_R1	D14_AB	D14	0.3066928905818079	0.18327378612841297
D14_AB_R2	D14_AB	D14	-0.2007351711025046	0.3185971349898157
D14_AB_R3	D14_AB	D14	0.4895590752561079	0.03081176703024965
D14_AB_R4	D14_AB	D14	0.18706479289738753	-0.42965190755562627
D14_AB+PFA_R1	D14_AB+PFA	D14	0.48444685088421924	-0.1700212377689965
D14_AB+PFA_R2	D14_AB+PFA	D14	-0.2128386445486607	0.4071232448751138
D14_AB+PFA_R3	D14_AB+PFA	D14	-0.045929533366615455	0.24984747536250862
D14_AB+PFA_R4	D14_AB+PFA	D14	-0.1341735231971762	0.09944266832374427
D21_CON_R1	D21_CON	D21	0.3967465534125638	-0.4653331262669069
D21_CON_R2	D21_CON	D21	0.3781180780506151	0.20816495411477415
D21_CON_R3	D21_CON	D21	0.24702163022490475	0.35687517648509315
D21_CON_R4	D21_CON	D21	0.09488957925985661	0.2669948286133227
D21_PFA_R1	D21_PFA	D21	0.16644464730157815	-0.11421963201872828
D21_PFA_R2	D21_PFA	D21	0.4153697800053103	-0.241619189182811
D21_PFA_R3	D21_PFA	D21	-0.12940257979793335	-0.4209472882177106
D21_PFA_R4	D21_PFA	D21	0.45717213107548654	-0.03783202107653812
D21_AGP_R1	D21_AGP	D21	-0.27814405679168297	-0.19315686349855657
D21_AGP_R2	D21_AGP	D21	-0.09053222486942057	0.42856096032492824
D21_AGP_R3	D21_AGP	D21	0.05448511286236579	-0.4469456178880601
D21_AGP_R4	D21_AGP	D21	0.11808787448637918	0.448184658883575
D21_AGP+PFA_R1	D21_AGP+PFA	D21	-0.01670653832326003	-0.09219510044378453
D21_AGP+PFA_R2	D21_AGP+PFA	D21	0.3105506428992159	0.3897501448724019
D21_AGP+PFA_R3	D21_AGP+PFA	D21	0.18869124957166064	-0.39136091704103776
D21_AGP+PFA_R4	D21_AGP+PFA	D21	0.22201926441901354	-0.5382593800389908
D21_AB_R1	D21_AB	D21	-0.20450273804404911	0.30631254997812324
D21_AB_R2	D21_AB	D21	0.05843983007654002	-0.5775023161407495
D21_AB_R3	D21_AB	D21	-0.4040779112609991	-0.09221268028143983
D21_AB_R4	D21_AB	D21	-0.5311810870640039	-0.1183895175428867
D21_AB+PFA_R1	D21_AB+PFA	D21	0.07844563022126905	-0.2750708187919335
D21_AB+PFA_R2	D21_AB+PFA	D21	-0.25358411448714346	-0.11573401802078234
D21_AB+PFA_R3	D21_AB+PFA	D21	-0.149260461418038	0.4336775831487509
D21_AB+PFA_R4	D21_AB+PFA	D21	8.53865e+09	0.3702123116033956
D35_CON_R1	D35_CON	D35	-0.42250132238604704	0.23990199428195985
D35_CON_R2	D35_CON	D35	0.33341565345484236	-0.2358862650164638
D35_CON_R3	D35_CON	D35	-0.3082944792797275	-0.3625225213229566
D35_CON_R4	D35_CON	D35	-0.5171876342036008	0.1483395152861168
D35_PFA_R1	D35_PFA	D35	-0.4993451167551296	-0.4529764072361765
D35_PFA_R2	D35_PFA	D35	0.38224709850691396	-0.4206185360328843
D35_PFA_R3	D35_PFA	D35	-0.31774321582957693	0.47724472727132816
D35_PFA_R4	D35_PFA	D35	-0.44545601377329375	0.05898551565450277
D35_AGP_R1	D35_AGP	D35	0.6167574515167553	0.5001706270123735
D35_AGP_R2	D35_AGP	D35	-0.5275003439646703	0.5144039603598654
D35_AGP_R3	D35_AGP	D35	0.2717644389473445	0.09533982135813104
D35_AGP_R4	D35_AGP	D35	0.04978471504011308	0.024644605047113563
D35_AGP+PFA_R1	D35_AGP+PFA	D35	-0.1071921836867852	-0.5821869262777345
D35_AGP+PFA_R2	D35_AGP+PFA	D35	0.7474769840308984	0.1322593786271165
D35_AGP+PFA_R3	D35_AGP+PFA	D35	0.11880960343878436	0.20120668925152646
D35_AGP+PFA_R4	D35_AGP+PFA	D35	-0.4164493263178988	-0.7019406864812968
D35_AB_R1	D35_AB	D35	0.551736603253709	0.1865294121129367
D35_AB_R2	D35_AB	D35	0.03641843084089364	0.6349172677787629
D35_AB_R3	D35_AB	D35	-0.029447025003241433	0.023041786051655983
D35_AB_R4	D35_AB	D35	-0.7179509771749402	-0.2312412523221218
D35_AB+PFA_R1	D35_AB+PFA	D35	0.47206419740156685	0.03576088076412035
D35_AB+PFA_R2	D35_AB+PFA	D35	0.5857270563645446	-0.08341135851102383
D35_AB+PFA_R3	D35_AB+PFA	D35	-0.2653696721104408	-0.709334624844595
D35_AB+PFA_R4	D35_AB+PFA	D35	-0.612287884379187	-0.31964278188102796

## Sheet: ARG_UNIQUE_CLASS
Days	CON	PFA	AGP	AGP+PFA	AB	AB+PFA
Day14	MEG_368|Drugs|Aminoglycosides|Aminoglycoside_N-acetyltransferases|AAC6-PRIME	MEG_1058|Drugs|Aminoglycosides|Aminoglycoside_O-phosphotransferases|APH3-DPRIME	MEG_1189|Drugs|Bacitracin|Undecaprenyl_pyrophosphate_phosphatase|BACA		MEG_7176|Drugs|Tetracyclines|Tetracycline_resistance_ribosomal_protection_proteins|TETO
	MEG_7228|Drugs|Tetracyclines|Tetracycline_resistance_ribosomal_protection_proteins|TETW	MEG_1087|Drugs|Aminoglycosides|Aminoglycoside_O-phosphotransferases|APH6	MEG_7162|Drugs|Tetracyclines|Tetracycline_resistance_ribosomal_protection_proteins|TETO		MEG_7014|Drugs|Tetracyclines|Tetracycline_resistance_MFS_efflux_pumps|TETA
	MEG_7236|Drugs|Tetracyclines|Tetracycline_resistance_ribosomal_protection_proteins|TETW	MEG_2435|Drugs|betalactams|Class_A_betalactamases|CTX	MEG_7152|Drugs|Tetracyclines|Tetracycline_resistance_ribosomal_protection_proteins|TETO		MEG_997|Drugs|Aminoglycosides|Aminoglycoside_O-nucleotidyltransferases|ANT6
	MEG_7174|Drugs|Tetracyclines|Tetracycline_resistance_ribosomal_protection_proteins|TETO	MEG_6631|Drugs|Sulfonamides|Sulfonamide-resistant_dihydropteroate_synthases|SULII	MEG_7070|Drugs|Tetracyclines|Tetracycline_resistance_MFS_efflux_pumps|TETD		MEG_171|Drugs|Aminoglycosides|Aminoglycoside_N-acetyltransferases|AAC6-PRIME
	MEG_7168|Drugs|Tetracyclines|Tetracycline_resistance_ribosomal_protection_proteins|TETO	MEG_1086|Drugs|Aminoglycosides|Aminoglycoside_O-phosphotransferases|APH6
		MEG_1091|Drugs|Aminoglycosides|Aminoglycoside_O-phosphotransferases|APH6
		MEG_6629|Drugs|Sulfonamides|Sulfonamide-resistant_dihydropteroate_synthases|SULII
		MEG_1019|Drugs|Aminoglycosides|Aminoglycoside_O-phosphotransferases|APH3-DPRIME
		MEG_1096|Drugs|Aminoglycosides|Aminoglycoside_O-phosphotransferases|APH6
		MEG_1057|Drugs|Aminoglycosides|Aminoglycoside_O-phosphotransferases|APH3-DPRIME
		MEG_1190|Drugs|Bacitracin|Undecaprenyl_pyrophosphate_phosphatase|BACA
		MEG_1085|Drugs|Aminoglycosides|Aminoglycoside_O-phosphotransferases|APH6
		MEG_6619|Drugs|Sulfonamides|Sulfonamide-resistant_dihydropteroate_synthases|SULII
		MEG_1055|Drugs|Aminoglycosides|Aminoglycoside_O-phosphotransferases|APH3-DPRIME
		MEG_75|Drugs|Aminoglycosides|Aminoglycoside_N-acetyltransferases|AAC6-PRIME
		MEG_1053|Drugs|Aminoglycosides|Aminoglycoside_O-phosphotransferases|APH3-DPRIME
		MEG_4031|Drugs|MLS|Macrolide_phosphotransferases|MPHB
		MEG_1095|Drugs|Aminoglycosides|Aminoglycoside_O-phosphotransferases|APH6
		MEG_6618|Drugs|Sulfonamides|Sulfonamide-resistant_dihydropteroate_synthases|SULII
		MEG_1054|Drugs|Aminoglycosides|Aminoglycoside_O-phosphotransferases|APH3-DPRIME
		MEG_1011|Drugs|Aminoglycosides|Aminoglycoside_O-phosphotransferases|APH2-DPRIME
Day21	MEG_173|Drugs|Aminoglycosides|Aminoglycoside_N-acetyltransferases|AAC6-PRIME	MEG_2795|Drugs|MLS|23S_rRNA_methyltransferases|ERMB	MEG_3620|Drugs|MLS|Lincosamide_nucleotidyltransferases|LNUG		MEG_2796|Drugs|MLS|23S_rRNA_methyltransferases|ERMB
	MEG_1053|Drugs|Aminoglycosides|Aminoglycoside_O-phosphotransferases|APH3-DPRIME	MEG_2802|Drugs|MLS|23S_rRNA_methyltransferases|ERMB	MEG_3621|Drugs|MLS|Lincosamide_nucleotidyltransferases|LNUP		MEG_1019|Drugs|Aminoglycosides|Aminoglycoside_O-phosphotransferases|APH3-DPRIME
		MEG_185|Drugs|Aminoglycosides|Aminoglycoside_N-acetyltransferases|AAC6-PRIME	MEG_2842|Drugs|MLS|23S_rRNA_methyltransferases|ERMQ		MEG_2797|Drugs|MLS|23S_rRNA_methyltransferases|ERMB
			MEG_1180|Drugs|Multi-drug_resistance|Multi-drug_RND_efflux_regulator|ASMA		MEG_1011|Drugs|Aminoglycosides|Aminoglycoside_O-phosphotransferases|APH2-DPRIME
			MEG_4061|Drugs|Multi-drug_resistance|Multi-drug_ABC_efflux_pumps|MSBA		MEG_2790|Drugs|MLS|23S_rRNA_methyltransferases|ERMB
			MEG_352|Drugs|Aminoglycosides|Aminoglycoside_N-acetyltransferases|AAC6-PRIME		MEG_1013|Drugs|Aminoglycosides|Aminoglycoside_O-phosphotransferases|APH2-DPRIME
			MEG_5400|Drugs|betalactams|Penicillin_binding_protein|PBP2
			MEG_2841|Drugs|MLS|23S_rRNA_methyltransferases|ERMQ
			MEG_7152|Drugs|Tetracyclines|Tetracycline_resistance_ribosomal_protection_proteins|TETO
			MEG_7171|Drugs|Tetracyclines|Tetracycline_resistance_ribosomal_protection_proteins|TETO
			MEG_7175|Drugs|Tetracyclines|Tetracycline_resistance_ribosomal_protection_proteins|TETO
			MEG_7156|Drugs|Tetracyclines|Tetracycline_resistance_ribosomal_protection_proteins|TETO
			MEG_7207|Drugs|Tetracyclines|Tetracycline_resistance_ribosomal_protection_proteins|TETW
			MEG_7014|Drugs|Tetracyclines|Tetracycline_resistance_MFS_efflux_pumps|TETA
			MEG_7157|Drugs|Tetracyclines|Tetracycline_resistance_ribosomal_protection_proteins|TETO
			MEG_997|Drugs|Aminoglycosides|Aminoglycoside_O-nucleotidyltransferases|ANT6
			MEG_3601|Drugs|MLS|Lincosamide_nucleotidyltransferases|LNUA
			MEG_3600|Drugs|MLS|Lincosamide_nucleotidyltransferases|LNUA
			MEG_7154|Drugs|Tetracyclines|Tetracycline_resistance_ribosomal_protection_proteins|TETO
			MEG_7206|Drugs|Tetracyclines|Tetracycline_resistance_ribosomal_protection_proteins|TETW
			MEG_1010|Drugs|Aminoglycosides|Aminoglycoside_O-phosphotransferases|APH2-DPRIME
			MEG_7160|Drugs|Tetracyclines|Tetracycline_resistance_ribosomal_protection_proteins|TETO
			MEG_7165|Drugs|Tetracyclines|Tetracycline_resistance_ribosomal_protection_proteins|TETO
Day35	MEG_7228|Drugs|Tetracyclines|Tetracycline_resistance_ribosomal_protection_proteins|TETW	MEG_7174|Drugs|Tetracyclines|Tetracycline_resistance_ribosomal_protection_proteins|TETO	MEG_3621|Drugs|MLS|Lincosamide_nucleotidyltransferases|LNUP		MEG_2802|Drugs|MLS|23S_rRNA_methyltransferases|ERMB
	MEG_185|Drugs|Aminoglycosides|Aminoglycoside_N-acetyltransferases|AAC6-PRIME		MEG_7168|Drugs|Tetracyclines|Tetracycline_resistance_ribosomal_protection_proteins|TETO		MEG_5409|Drugs|betalactams|Penicillin_binding_protein|PBP4B
	MEG_7152|Drugs|Tetracyclines|Tetracycline_resistance_ribosomal_protection_proteins|TETO		MEG_1058|Drugs|Aminoglycosides|Aminoglycoside_O-phosphotransferases|APH3-DPRIME
	MEG_7175|Drugs|Tetracyclines|Tetracycline_resistance_ribosomal_protection_proteins|TETO		MEG_1086|Drugs|Aminoglycosides|Aminoglycoside_O-phosphotransferases|APH6
	MEG_7156|Drugs|Tetracyclines|Tetracycline_resistance_ribosomal_protection_proteins|TETO		MEG_1019|Drugs|Aminoglycosides|Aminoglycoside_O-phosphotransferases|APH3-DPRIME
	MEG_7149|Drugs|Tetracyclines|Tetracycline_resistance_ribosomal_protection_proteins|TETO		MEG_1057|Drugs|Aminoglycosides|Aminoglycoside_O-phosphotransferases|APH3-DPRIME
	MEG_7207|Drugs|Tetracyclines|Tetracycline_resistance_ribosomal_protection_proteins|TETW		MEG_1045|Drugs|Aminoglycosides|Aminoglycoside_O-phosphotransferases|APH3-DPRIME
	MEG_7154|Drugs|Tetracyclines|Tetracycline_resistance_ribosomal_protection_proteins|TETO		MEG_1055|Drugs|Aminoglycosides|Aminoglycoside_O-phosphotransferases|APH3-DPRIME
	MEG_7165|Drugs|Tetracyclines|Tetracycline_resistance_ribosomal_protection_proteins|TETO		MEG_1053|Drugs|Aminoglycosides|Aminoglycoside_O-phosphotransferases|APH3-DPRIME
	MEG_7153|Drugs|Tetracyclines|Tetracycline_resistance_ribosomal_protection_proteins|TETO		MEG_1046|Drugs|Aminoglycosides|Aminoglycoside_O-phosphotransferases|APH3-DPRIME
			MEG_1095|Drugs|Aminoglycosides|Aminoglycoside_O-phosphotransferases|APH6
			MEG_1054|Drugs|Aminoglycosides|Aminoglycoside_O-phosphotransferases|APH3-DPRIME
			MEG_2788|Drugs|MLS|23S_rRNA_methyltransferases|ERMB
			MEG_729|Drugs|betalactams|Penicillin_binding_protein|AMPH
			MEG_997|Drugs|Aminoglycosides|Aminoglycoside_O-nucleotidyltransferases|ANT6
			MEG_4074|Drugs|MLS|MLS_resistance_ABC_efflux_pumps|MSRD
			MEG_6630|Drugs|Sulfonamides|Sulfonamide-resistant_dihydropteroate_synthases|SULII
			MEG_7242|Drugs|Tetracyclines|Tetracycline_inactivation_enzymes|TETX
			MEG_6622|Drugs|Sulfonamides|Sulfonamide-resistant_dihydropteroate_synthases|SULII
			MEG_1097|Drugs|Aminoglycosides|Aminoglycoside_O-phosphotransferases|APH6
			MEG_7180|Drugs|Tetracyclines|Tetracycline_resistance_ribosomal_protection_proteins|TETQ
			MEG_6636|Drugs|Sulfonamides|Sulfonamide-resistant_dihydropteroate_synthases|SULII
			MEG_6628|Drugs|Sulfonamides|Sulfonamide-resistant_dihydropteroate_synthases|SULII
			MEG_6625|Drugs|Sulfonamides|Sulfonamide-resistant_dihydropteroate_synthases|SULII
			MEG_6582|Drugs|Sulfonamides|Sulfonamide-resistant_dihydropteroate_synthases|SULI
			MEG_6626|Drugs|Sulfonamides|Sulfonamide-resistant_dihydropteroate_synthases|SULII
			MEG_4073|Drugs|MLS|MLS_resistance_ABC_efflux_pumps|MSRD
			MEG_728|Drugs|betalactams|Class_C_betalactamases|AMPC

## Sheet: ARG_RELATIVE_ABUNDANCE_CLASS
CLASS	D3	D14_CON	D14_PFA	D14_AGP	D14_AGP+PFA	D14_AB	D14_AB+PFA	D21_CON	D21_PFA	D21_AGP	D21_AGP+PFA	D21_AB	D21_AB+PFA	D35_CON	D35_PFA	D35_AGP	D35_AGP+PFA	D35_AB	D35_AB+PFA
Aminoglycosides	0.06832392713628786	0.40623729323571195	0.2357926662452234	0.31450389898894615	0.320525695256429	0.3621617481308807	0.41399050986376545	0.3935529234192547	0.3267315958515932	0.42817858130049	0.2513146641355765	0.4204557489952372	0.3156366956611805	0.24526657681734793	0.20786508711974408	0.3044479987816817	0.21795209224621767	0.22276748259883938	0.2848315445358765
Bacitracin	0.0014187774058256645	0.0008974109351927571	0.0016431841522523063	0.007302362486176945	0.0004737513486066969	0.0	0.003832594433753904	0.014761391319527103	0.0020681135173893374	0.0006583445143038545	0.007139626315740381	0.02422516296102091	0.004913988728937564	0.0044049408686413416	0.0	0.009762598564766264	0.005095888453129061	0.0027292985045965184	0.004101531258020924
MLS	0.0678106645224837	0.30575895672756864	0.31628604906969937	0.24788046241260656	0.16341385807417108	0.1531731148665698	0.2825421709181973	0.30770423597167446	0.2721135441808446	0.2306180067263327	0.40787931748560086	0.13054996448355496	0.17260952189252385	0.3248320831193644	0.2327837557273032	0.35285957857852146	0.29747604173378517	0.20543042876699097	0.1585426112992705
Multi-drug_resistance	0.03349331280578187	0.008287485855722459	0.02642950859903122	0.018002813577491474	0.021255638642096297	0.02505481208518834	0.006118018742631771	0.03153583880796092	0.028062935878706598	0.030081951676693926	0.020573322190710057	0.033819621507980256	0.03740671585721909	0.016331588130148178	0.02064568629486845	0.012138295028212563	0.010682204283994948	0.020977806823829923	0.012773419205700735
Nucleosides	0.00027310219225343035	0.02511253956375177	0.021972562403753844	0.024975426010668704	0.03634215339065582	0.029323467812187493	0.049493287006502434	0.02333024603537515	0.040878836943854385	0.02227125210328706	0.037141974198672	0.038948333145828636	0.028220098820345117	0.01909399890737213	0.020095627972807676	0.011901965124912425	0.019986999117530414	0.01432122841547015	0.023935724213342686
Other	0.0	0.0	0.0018537990814133062	0.0013248502268807785	0.0010456931807292795	0.0012719038772367511	0.0	0.0	0.0	0.0	0.001441109942696752	0.00107426108168658	0.0	0.0	0.0007431042503934063	0.0004250528884231358	0.0	0.0013660155724643914	0.0004781972052468764
Phenicol	0.0004433480982159115	0.002208304521561555	0.0014705230949162917	0.0007697500917699535	0.003278250058530297	0.0020536687571575908	0.0005389426309034475	0.0010523830904340453	0.004856427386238093	0.00177449637161991	0.001708970910902563	0.0032883796769606244	0.00429564548896765	0.005605734031207183	0.005356274319576361	0.001985823615177163	0.004695861300218662	0.003797984243201323	0.0032309658552114847
Sulfonamides	0.03521140111878582	0.002417433330835343	0.03252878555459894	0.030652082003631398	0.019241833176833707	0.02660275289843093	0.004204373985877222	0.0031773750328876202	0.009136607932526783	0.007598319503656461	0.007845635418197824	0.008256055558492537	0.015728113342545928	0.004469785538985013	0.007194531234060413	0.011830904846632611	0.02043005053729735	0.0330095815942993	0.009907291404700171
Tetracyclines	0.7512777154576373	0.24337938165070536	0.343685709836095	0.3395844337149391	0.4281707219327135	0.3700112163332889	0.19231400817272726	0.2224791013588523	0.3007492306547269	0.2614204003192907	0.25163949760735105	0.3330827337893932	0.41153725818391185	0.3751907345851633	0.5021636608093424	0.2880736401740667	0.4165302401239208	0.4843303035082119	0.49542422706844375
Trimethoprim	0.022735550788473315	0.0027159497753309176	0.0	0.005086271878112262	0.0021988892692705922	0.007630672722074813	0.013436858793454265	0.0024065049640337047	0.004058595279087687	0.008744627068340373	0.0015879340824333885	0.0016518880610420497	0.001678460002950966	0.0014542642281894908	0.002123614561628927	0.0032677715832106656	0.0006610875660217741	0.007935068265213686	0.003762726900946683
betalactams	0.019012200474255184	0.0029852444036193282	0.01833721196301626	0.009917648608776624	0.004053515669963788	0.022716642516984624	0.033529235452187056	0.0	0.01134411237503242	0.008654020415984886	0.01172794771211851	0.004647850738803211	0.00797350202141728	0.003350293773581085	0.0010286577102751541	0.0033063708143952555	0.006489534637884117	0.003334801706882575	0.003011761053239764

## Sheet: ARG_RELATIVE_ABUNDANCE_MECH
MECHANISM	D3	D14_CON	D14_PFA	D14_AGP	D14_AGP+PFA	D14_AB	D14_AB+PFA	D21_CON	D21_PFA	D21_AGP	D21_AGP+PFA	D21_AB	D21_AB+PFA	D35_CON	D35_PFA	D35_AGP	D35_AGP+PFA	D35_AB	D35_AB+PFA
23S_rRNA_methyltransferases	0.015275206862802943	0.02102456472840798	0.02364285278603894	0.034760344026387946	0.01865498442240454	0.01891102769486409	0.02614549014059255	0.02217487373020716	0.02629418277978162	0.036142411676121595	0.02457584565037601	0.023669918657446838	0.022766686562345435	0.021630560484064983	0.020419970155748455	0.017068074840261037	0.023137390846022055	0.055731517866887265	0.02985842604796653
Aminoglycoside_O-nucleotidyltransferases	0.0574290012557149	0.21732826064090308	0.15905594794297262	0.2023625731418032	0.19266296276519718	0.24239140992853211	0.22020608850102646	0.2600264438794314	0.17927985288740578	0.24472025630238994	0.12658085180505238	0.19739860480254157	0.1674851649718644	0.1450657715357952	0.12346688576603061	0.22886338476308157	0.1270387339304825	0.1303572188087135	0.15355344621758232
Aminoglycoside_O-phosphotransferases	0.009195552804846336	0.17764963698028655	0.06544426434195633	0.09939073378407003	0.1151912875715286	0.10993180611760368	0.19118645066286785	0.1280214787157305	0.13201919599505238	0.1726508912719163	0.11559381653337826	0.20268368930805045	0.1318316188374301	0.08565792737634816	0.07412141997385076	0.0712656914978975	0.07716071094289316	0.08147284765310259	0.11381205159966326
Lincosamide_nucleotidyltransferases	0.03641410797258182	0.26913642289673	0.23922778591847496	0.18854429015044027	0.11396122750762451	0.11736957957138429	0.050000382579010634	0.26469861037393605	0.20915356458931958	0.14029010790812455	0.344063735466101	0.09369408135349941	0.1288875791281279	0.19989853208636899	0.1336579952589769	0.2343714855644585	0.2505104153929332	0.12990255039062745	0.10614985388274792
MLS_resistance_ABC_efflux_pumps	0.01069218855084027	0.003803186678319146	0.03181479443395103	0.002283946183433626	0.0	0.012957307757886437	0.0013912690410370972	0.014929541477262486	0.03283598265039762	0.04504469934264959	0.03611854838400519	0.005034913034462926	0.003350822887931101	0.09263506287930225	0.07690845063103284	0.03158994846703253	0.02021732058044252	0.01765914277954648	0.021929977046882577
Macrolide_phosphotransferases	0.0	0.01179478242411148	0.021012117569956676	0.022291882052344746	0.030319369389995438	0.0039351998424350014	0.205005029157557	0.005901210390268745	0.003829814161345741	0.009140787799436993	0.003121187985118688	0.008151051438145764	0.017604433314119452	0.010667927669628206	0.0017973396815449648	0.06835403275046444	0.0036109149143874223	0.0021372177299297675	0.0006043543216734607
Multi-drug_ABC_efflux_pumps	0.003448860167484172	0.006091570826572317	0.025426500841131804	0.018002813577491474	0.021255638642096297	0.017688157495137635	0.006118018742631771	0.026403233305036904	0.028062935878706598	0.030081951676693933	0.020573322190710057	0.033819621507980256	0.037406715857219094	0.016331588130148178	0.020645686294868442	0.012138295028212561	0.010682204283994946	0.020977806823829923	0.012773419205700735
Other	0.3332228580628727	0.023872794836418763	0.03663716895279706	0.03834239203859789	0.026609485195173508	0.05296170156891844	0.05442561113604649	0.028857885701011624	0.03775979552688253	0.031050862625711582	0.0327455847610375	0.055260997404158546	0.0351815080941596	0.02935811080682364	0.019528432221736548	0.02606287033744755	0.03370577719632981	0.03138639903871862	0.03479737307488281
Streptothricin_acetyltransferase	0.00027310219225343035	0.02511253956375177	0.021972562403753844	0.024975426010668704	0.03634215339065583	0.029323467812187497	0.049493287006502434	0.02333024603537515	0.04087883694385438	0.022271252103287065	0.037141974198672	0.038948333145828636	0.02822009882034512	0.01909399890737213	0.02009562797280767	0.011901965124912421	0.01998699911753041	0.01432122841547015	0.023935724213342686
Sulfonamide-resistant_dihydropteroate_synthases	0.03521140111878582	0.002417433330835343	0.03252878555459894	0.030652082003631398	0.01924183317683371	0.026602752898430934	0.004204373985877222	0.0031773750328876202	0.009136607932526781	0.007598319503656463	0.007845635418197824	0.008256055558492537	0.015728113342545928	0.004469785538985013	0.007194531234060411	0.01183090484663261	0.020430050537297347	0.0330095815942993	0.009907291404700171
Tetracycline_resistance_ribosomal_protection_proteins	0.4988377210118177	0.2417688070936637	0.34323721925436773	0.33839351703113074	0.42576105793849045	0.3679275893126199	0.1918239990468505	0.2224791013588523	0.30074923065472686	0.2610084597900121	0.25163949760735105	0.3330827337893932	0.4115372581839119	0.3751907345851633	0.5021636608093422	0.2865533467795992	0.41351948225768664	0.4830444888988749	0.49267808298485766

[truncated: 1 more sheets: ARG_DEGS]
