# Supplementary material for: Metatranscriptomic Analysis of the Chicken Gut Resistome Response to In-Feed Antibiotics and Natural Feed Additives
Source: Front Microbiol. 2022 Apr 14;13:833790. doi: 10.3389/fmicb.2022.833790 (PMC9048739; doi:10.3389/fmicb.2022.833790)
Supplement: Supplementary file 2 [file Data_Sheet_2.xlsx]

## Sheet: TITLE PAGE
				Metatranscriptomic analysis of the chicken gut resistome response to in-feed antibiotics and natural feed additives
				Raju Koorakula, Matteo Schiavinato, Mahdi Ghanbari, Gertrude Wegl, Nikolaus Grabner, Andreas Koestelbauer, Viviana Klose, Juliane C. Dohm, Konrad J. Domig
								Correspondence:
								Corresponding Author
								raju.koorakula@ffoqsi.at

## Sheet: CONTENT
					Supporting Information-Tables
						Contents
		1.TAXA_NMDS_PERMANOVA. Results of the permanova test on the identified taxa performed between each group of samples, where a group is defined by timepoint+treatment (e.g. “D21_AB”). Indicated are the two groups compared, the resulting p-value, and whether the p-value is lower than 0.05 (which we used as a significance threshold).
		2. TAXA_RELATIVE_ABUNDANCE_PYLUM. Relative abundance of all identified phyla (1st column) in each sample (other columns).
		3. TAXA_RELATIVE_ABUNDANCE_GENUS. Relative abundance of all identified genera (1st column) in each sample (other columns).
		4. TAXA_DEGS. Differentially abundant taxa (1st column) identified at each timepoint, treatment, and in each comparison (columns 2,3,4). Shown is also their log2FoldChange (“LFC”), the associated p-value (“padj”) and the direction of the regulation (“up” or “down”).

## Sheet: TAXA_NMDS_PERMANOVA
Group_1	Group_2	P_value	<0.05
D14_CON	D14_AGP+PFA	0.09	FAIL
D14_CON	D14_PFA	0.633	FAIL
D14_CON	D14_AGP	0.082	FAIL
D14_CON	D3	0.008	PASS
D14_CON	D14_AB	0.213	FAIL
D14_CTX	D14_AB+PFA	0.416	FAIL
D14_AGP+PFA	D14_PFA	0.109	FAIL
D14_AGP+PFA	D14_AGP	0.825	FAIL
D14_AGP+PFA	D3	0.008	PASS
D14_AGP+PFA	D14_AB	0.437	FAIL
D14_AGP+PFA	D14_AB+PFA	0.477	FAIL
D14_PFA	D14_AGP	0.347	FAIL
D14_PFA	D3	0.005	PASS
D14_PFA	D14_AB	0.332	FAIL
D14_PFA	D14_AB+PFA	0.894	FAIL
D21_AB	D21_AB+PFA	0.42	FAIL
D21_AB	D21_CTX	0.032	PASS
D21_AB	D21_AGP	0.121	FAIL
D21_AB	D21_AGP+PFA	0.124	FAIL
D21_AB	D21_PFA	0.02	PASS
D21_AB	D3	0.005	PASS
D35_CON	D35_AB	0.601	FAIL
D35_CON	D35_AB+PFA	0.732	FAIL
D35_CON	D35_AGP+PFA	0.514	FAIL
D35_CON	D35_AGP	0.483	FAIL
D35_CON	D35_PFA	0.808	FAIL
D35_CON	D3	0.007	PASS
D21_AB+PFA	D21_CTX	0.013	PASS
D21_AB+PFA	D21_AGP	0.083	FAIL
D21_AB+PFA	D21_AGP+PFA	0.204	FAIL
D21_AB+PFA	D21_PFA	0.033	PASS
D21_AB+PFA	D3	0.006	PASS
D35_AB	D35_AB+PFA	0.8	FAIL
D35_AB	D35_AGP+PFA	0.377	FAIL
D35_AB	D35_AGP	0.472	FAIL
D35_AB	D35_PFA	0.907	FAIL
D35_AB	D3	0.006	PASS
D35_AB+PFA	D35_AGP+PFA	0.443	FAIL
D35_AB+PFA	D35_AGP	0.199	FAIL
D35_AB+PFA	D35_PFA	0.937	FAIL
D35_AB+PFA	D3	0.009	PASS
D21_CON	D21_AGP	0.478	FAIL
D21_CON	D21_AGP+PFA	0.04	PASS
D21_CON	D21_PFA	0.512	FAIL
D21_CON	D3	0.008	PASS
D21_AGP	D21_AGP+PFA	0.493	FAIL
D21_AGP	D21_PFA	0.82	FAIL
D21_AGP	D3	0.009	PASS
D21_AGP+PFA	D21_PFA	0.029	PASS
D21_AGP+PFA	D3	0.007	PASS
D35_AGP+PFA	D35_AGP	0.646	FAIL
D35_AGP+PFA	D35_PFA	0.267	FAIL
D35_AGP+PFA	D3	0.004	PASS
D21_PFA	D3	0.006	PASS
D35_AGP	D35_PFA	0.252	FAIL
D35_AGP	D3	0.008	PASS
D35_PFA	D3	0.006	PASS
D14_AGP	D3	0.007	PASS
D14_AGP	D14_AB	0.246	FAIL
D14_AGP	D14_AB+PFA	0.861	FAIL
D3	D14_AB	0.006	PASS
D3	D14_AB+PFA	0.008	PASS
D14_AB	D14_AB+PFA	0.35	FAIL

## Sheet: TAXA_RELATIVE_ABUNDANCE_PYLUM
Taxa	F3_CON_R1	F3_CON_R1	F3_CON_R1	F3_CON_R1	F3_CON_R1	F3_CON_R1	F14_CON_R1	F14_CON_R2	F14_CON_R3	F14_CON_R4	F14_PFA_R1	F14_PFA_R2	F14_PFA_R3	F14_PFA_R4	F14_AGP_R1	F14_AGP_R2	F14_AGP_R3	F14_AGP_R4	F14_AGP+PFA_R1	F14_AGP+PFA_R2	F14_AGP+PFA_R3	F14_AGP+PFA_R4	F14_AB_R1	F14_AB_R2	F14_AB_R3	F14_AB_R4	F14_AB+PFA_R1	F14_AB+PFA_R2	F14_AB+PFA_R3	F14_AB+PFA_R4	F21_CON_R1	F21_CON_R2	F21_CON_R3	F21_CON_R4	F21_PFA_R1	F21_PFA_R2	F21_PFA_R3	F21_PFA_R4	F21_AGP_R1	F21_AGP_R2	F21_AGP_R3	F21_AGP_R4	F21_AGP+PFA_R1	F21_AGP+PFA_R2	F21_AGP+PFA_R3	F21_AGP+PFA_R4	F21_AB_R1	F21_AB_R2	F21_AB_R3
Firmicutes	8799521	92818565	9789937	9646823	7895158	95629135	8729874	9058717	8574716	82964905	78459236	9037711	8523262	83396675	7907535	8491245	807265	7446979	8013404	8046632	7720633	8444157	81886375	8815527	8490246	7750101	8434061	8633591	6789358	79549774	9003502	8256477	8433216	80988106	8717743	81904564	8120436	9062155	88004005	7858286	7696309	92728546	8102481	8215928	7953796	75387695	8241824	75615364	7701081
Proteobacteria	38515408	0.0	1130339	19609805	7022809	18703742	45404544	36610982	45709143	66519966	11885944	31409423	4212106	47609525	8115681	5372686	78655057	1280512	6742022	78655047	9445667	39096096	74114823	3961585	35617814	1042417	4972984	4901471	12272455	74837418	3201601	7562269	52626314	790079	4080816	77123127	60718217	33630266	3611806	888711	10813245	1870374	69355474	58234935	8640865	8394197	6490649	10076045	11244497
Chordata	55422173	69713936	0.35010502	11305654	13085234	1270254	23802383	17505251	1810362	27208166	2381191	21406424	6153077	3480696	37826478	23711855	37125986	29811924	31209362	2681877	38222935	4279573	28105621	26210485	38519263	23509405	28617172	31809547	11142229	6733366	2681341	18205464	35517757	1980198	25405078	21906571	27608283	16014411	24512258	3222578	29008703	19103819	29023216	39023407	30403042	3761881	34703472	38623173	25610244
Actinobacteria	17507004	0.0	0.36010805	0.15007505	0.55022013	0.8801761	22702272	14004201	2340468	23807147	3291646	17705312	13506755	180036	34023817	25812905	34324024	46218486	3270981	34824371	40224133	20197983	275055	17006805	19509757	4031613	2131279	2320696	42108426	22411206	19609805	37811346	26913457	46404643	21104217	3140942	33610084	16514862	19109554	37229784	39811943	0.840168	3793034	26515906	30803082	3871936	29202921	51831098	4031613
Streptophyta	0.17006804	0.0	0.0	0.0	0.0	0.0	0.530053	0.61018306	0.44008806	11303393	0.62031025	0.47014105	0.6303152	1040208	0.50035024	0.92046016	0.91063744	0.85034007	0.9502851	10407283	0.8705224	0.83991605	1160232	0.9503802	13806905	14805923	0.7804683	0.71021307	0.80016005	0.70035017	0.3701851	0.5701711	0.9304652	0.670067	0.7501499	0.850255	1060318	0.5805224	0.68034023	10008006	0.8602581	0.630126	0.98078454	12107263	11501151	10705354	0.84008396	0.73043823	0.6402561
Bacteroidetes	0.0	0.0	0.0	0.0	0.0	0.0	0.7400741	0.40012002	0.81016207	0.68020415	0.7203603	0.44013202	0.34017012	0.85017	0.9706795	0.77038515	0.7305113	0.85034007	0.8602581	0.9306513	0.9005403	0.5899411	0.79015803	0.54021615	0.62031025	0.95038015	10206124	0.4901471	0.84016806	0.7103551	0.3801901	0.8602582	0.6303151	0.870087	0.44008797	0.790237	0.7402221	0.46041435	0.4202101	0.98078465	11003301	0.40008003	0.9207365	0.71042615	0.8700871	0.9304653	0.90009004	11306784	11504601
Arthropoda	0.0	0.0	0.0	0.0	0.0	0.0	0.43004304	0.290087	0.25005004	0.50015014	0.32016012	0.23006901	0.28014007	0.560112	0.3302312	0.5002501	0.4303012	0.33013204	0.62018603	0.52036417	0.44026417	0.4299571	0.570114	0.4201681	0.6303152	0.52020806	14508706	0.36010808	0.41008204	0.3301651	0.19009505	0.36010808	0.4302151	0.37003702	0.29005796	0.510153	0.6001801	0.31027925	0.3901951	0.6305044	0.47014105	0.40008003	0.5604483	0.5803481	0.63006306	0.57028514	0.46004602	0.43025813	0.39015606
Ascomycota	0.0	0.0	0.0	0.0	0.0	0.0	0.260026	0.17005101	0.22004403	0.31009308	0.25012508	0.18005402	0.22011006	0.24004799	0.23016113	0.26013005	0.25017512	0.32012802	0.31009302	0.35024512	0.38022816	0.259974	0.320064	0.21008405	0.44022018	0.31012407	0.28016812	0.24007203	0.42008403	0.20010003	0.15007505	0.290087	0.3301651	0.350035	0.26005197	0.350105	0.38011402	0.23020718	0.2701351	0.36028826	0.37011105	0.15003	0.46036825	0.37022206	0.39003903	0.43021515	0.44004402	0.42025214	0.39015606
Bacillariophyta	0.0	0.0	0.0	0.0	0.0	0.0	0.0	0.0	0.110022016	0.0	0.13006504	0.0	0.0	0.130026	0.0	0.0	0.10007004	0.0	0.0	0.0	0.0	0.0	0.0	0.15006004	0.0	0.0	0.17010207	0.0	0.0	0.0	0.0	0.0	0.0	0.0	0.0	0.0	0.0	0.0	0.0	0.0	0.0	0.0	0.0	0.14008403	0.0	0.0	0.0	0.0	0.0
Cyanobacteria	0.0	0.0	0.0	0.0	0.0	0.0	0.130013	0.0	0.14002801	0.12003602	0.17008507	0.100030005	0.0	0.110022	0.1901331	0.14007004	0.14009807	0.17006801	0.16004801	0.16011205	0.20012008	0.09999002	0.18003601	0.13005203	0.13006504	0.16006403	0.14008406	0.11003301	0.18003602	0.12006002	0.0	0.18005404	0.110055014	0.170017	0.10001999	0.18005401	0.16004801	0.0	0.11005503	0.22017613	0.27008104	0.0	0.23018412	0.15009004	0.21002102	0.20010006	0.170017	0.2901741	0.26010403
Apicomplexa	0.0	0.0	0.0	0.0	0.0	0.0	0.0	0.0	0.0	0.45013508	0.0	0.0	0.0	1030206	0.0	0.10005002	0.0	0.0	0.16004801	0.15010506	0.24014409	0.15998402	0.15003	0.100040026	0.2801401	0.0	0.10006004	0.11003301	0.0	0.0	0.0	0.0	0.23011504	0.0	0.0	0.190057	0.16004801	0.0	0.0	0.12009607	0.0	0.10002001	0.15012008	0.16009602	0.260026	0.15007505	0.0	0.0	0.0
Other	0.3801521	0.210042	0.260078	0.29014507	0.26010403	0.35007003	10901091	10303091	12002401	12403723	11805904	0.9402821	0.8604303	1130226	10307215	11405702	11608125	1060424	1160348	11107774	10906545	10198982	1170234	10604242	12206105	11904762	0.9505704	11403422	0.9601921	13106552	10305152	0.9602881	10605302	0.990099	10502099	11603479	10903271	10509458	14407204	12309848	10903271	0.97019404	11509205	10806482	11101112	10905453	1170117	10906544	11804721
Tenericutes	0.0	0.0	0.0	0.0	0.0	0.0	0.11001101	0.0	0.0	0.31009308	0.25012508	0.0	0.0	0.220044	0.17011908	0.29014504	0.13009104	0.18007202	0.27008104	0.14009805	0.2301381	0.14998503	0.220044	0.0	0.110055044	0.18007204	0.16009606	0.10003002	0.13002601	0.19009504	0.0	0.130039	0.10005002	0.120012	0.0	0.190057	0.16004801	0.13011709	0.0	0.42033628	0.17005101	0.0	0.22017612	0.17010203	0.38003802	0.3801901	0.140014	0.11006604	0.12004802
Planctomycetes	0.0	0.0	0.0	0.0	0.0	0.0	0.100010015	0.0	0.10002001	0.0	0.110055044	0.0	0.0	0.0	0.14009807	0.110055014	0.14009807	0.16006401	0.130039	0.14009805	0.14008406	0.0	0.120023996	0.0	0.0	0.16006403	0.0	0.0	0.19003801	0.0	0.0	0.14004202	0.110055014	0.170017	0.0	0.120036	0.130039	0.0	0.0	0.13010408	0.21006303	0.0	0.15012008	0.12007202	0.130013	0.16008005	0.10001001	0.23013808	0.20008004
Mollusca	0.0	0.0	0.0	0.0	0.0	0.0	0.0	0.100030005	0.0	0.34010208	0.0	0.100030005	0.14007004	0.90018	0.0	0.110055014	0.0	0.33013204	0.15004502	0.48033613	0.10006004	0.0	0.220044	0.0	0.14007005	0.0	0.0	0.0	0.0	0.0	0.0	0.130039	0.13006502	0.280028	0.11002199	0.430129	0.110033005	0.0	0.0	0.0	0.18005402	0.0	0.12009606	0.4302581	0.0	0.5402702	0.0	0.11006604	0.10004002
Spirochaetes	0.0	0.0	0.0	0.0	0.0	0.0	0.12001201	0.0	0.0	0.10003003	0.10005004	0.0	0.0	0.120023996	0.11007705	0.14007004	0.110077046	0.110044	0.110033005	0.14009805	0.14008406	0.0	0.130026	0.0	0.0	0.13005202	0.0	0.0	0.12002401	0.0	0.0	0.20006004	0.10005002	0.130013	0.10001999	0.17005101	0.120036	0.0	0.0	0.15012011	0.15004502	0.0	0.1801441	0.12007202	0.14001401	0.15007505	0.120012	0.20012008	0.18007204
Deinococcus-Thermus	0.0	0.0	0.0	0.0	0.0	0.0	0.0	0.0	0.0	0.0	0.13006504	0.0	0.0	0.0	0.10007005	0.0	0.0	0.14005601	0.0	0.0	0.13007805	0.0	0.0	0.0	0.0	0.10004002	0.0	0.0	0.12002401	0.0	0.0	0.11003301	0.0	0.140014	0.0	0.110033005	0.110033005	0.0	0.0	0.13010408	0.15004502	0.0	0.12009606	0.0	0.130013	0.11005503	0.10001001	0.19011407	0.14005603
Euryarchaeota	0.0	0.0	0.0	0.0	0.0	0.0	0.0	0.0	0.0	0.10003003	0.0	0.0	0.0	0.0	0.0	0.10005002	0.0	0.120048	0.100030005	0.11007703	0.11006604	0.0	0.110022	0.0	0.0	0.11004402	0.0	0.0	0.110022016	0.0	0.0	0.23006904	0.0	0.10001001	0.0	0.0	0.0	0.0	0.0	0.0	0.120036	0.0	0.10008005	0.11006602	0.100010015	0.11005503	0.10001001	0.11006604	0.11004402
Basidiomycota	0.0	0.0	0.0	0.0	0.0	0.0	0.0	0.0	0.0	0.0	0.0	0.0	0.0	0.0	0.0	0.0	0.0	0.10004	0.0	0.0	0.0	0.0	0.0	0.0	0.0	0.17006804	0.0	0.0	0.0	0.0	0.0	0.11003301	0.0	0.130013	0.0	0.0	0.100030005	0.0	0.0	0.100080065	0.100030005	0.0	0.0	0.0	0.0	0.0	0.0	0.11006604	0.0
Chlorophyta	0.0	0.0	0.0	0.0	0.0	0.0	0.0	0.0	0.0	0.0	0.0	0.0	0.0	0.0	0.0	0.0	0.16011205	0.0	0.0	0.12008403	0.0	0.09999002	0.0	0.0	0.0	0.0	0.0	0.0	0.0	0.0	0.0	0.0	0.0	0.0	0.0	0.0	0.0	0.0	0.0	0.0	0.100030005	0.0	0.0	0.11006602	0.100010015	0.0	0.0	0.0	0.0
Fusobacteria	0.0	0.0	0.0	0.0	0.0	0.0	0.0	0.0	0.0	0.0	0.0	0.0	0.0	0.120023996	0.0	0.0	0.0	0.0	0.0	0.0	0.0	0.0	0.0	0.0	0.0	0.0	0.11006604	0.0	0.0	0.0	0.0	0.0	0.0	0.0	0.0	0.0	0.0	0.0	0.0	0.110088065	0.0	0.0	0.0	0.0	0.100010015	0.10005003	0.0	0.0	0.0
Negarnaviricota	0.0	0.0	0.0	0.0	0.0	0.0	0.0	0.0	0.0	0.0	0.0	0.0	0.0	0.0	0.0	0.18009004	0.0	0.0	0.0	0.0	0.0	0.0	0.0	0.0	0.0	0.0	0.0	0.0	0.0	0.0	0.0	0.0	0.0	0.0	0.0	0.0	0.0	0.0	0.0	0.0	0.0	0.0	0.0	0.0	0.0	0.0	0.0	0.0	0.0
Uroviricota	0.0	0.0	0.0	0.0	0.0	0.0	0.0	0.0	0.160032	0.0	0.0	0.110033005	0.0	0.0	0.0	0.0	0.0	0.20008	0.0	0.0	0.27016214	0.30996904	0.0	0.0	0.51025516	0.0	0.0	0.0	0.0	0.4302151	0.0	0.0	0.0	0.0	0.0	0.0	0.0	0.0	0.0	0.0	0.0	0.0	0.0	0.0	0.0	0.0	0.0	0.0	0.0
Peploviricota	0.0	0.0	0.0	0.0	0.0	0.0	0.0	0.0	0.0	0.0	0.0	0.0	0.0	0.0	0.0	0.0	0.0	0.20008	0.0	0.0	0.2601561	0.0	0.0	0.0	0.17008507	0.0	0.0	0.0	0.0	0.0	0.0	0.0	0.0	0.0	0.0	0.0	0.0	0.0	0.0	0.0	0.0	0.0	0.0	0.0	0.0	0.0	0.0	0.0	0.0
Phixviricota	0.0	0.0	0.0	0.0	0.0	0.0	0.0	0.0	0.31006202	0.0	0.0	0.0	0.0	0.0	0.0	0.0	0.0	0.0	0.0	0.0	0.0	0.0	0.0	0.0	0.0	0.0	0.0	0.0	0.0	0.0	0.0	0.0	0.0	0.0	0.0	0.0	0.0	0.0	0.0	0.0	0.0	0.0	0.0	0.0	0.0	0.0	0.0	0.0	0.0
Verrucomicrobia	0.0	0.0	0.0	0.0	0.0	0.0	0.0	0.0	0.0	0.0	0.0	0.0	0.0	0.0	0.0	0.0	0.0	0.0	0.0	0.0	0.0	0.0	0.0	0.0	0.0	0.0	0.0	0.0	0.0	0.0	0.0	0.0	0.0	0.0	0.0	0.0	0.0	0.0	0.0	0.0	0.0	0.0	0.0	0.0	0.0	0.0	0.0	0.0	0.0
Euglenozoa	0.0	0.0	0.0	0.0	0.0	0.0	0.0	0.0	0.0	0.0	0.0	0.0	0.0	0.0	0.0	0.0	0.0	0.0	0.0	0.0	0.0	0.0	0.0	0.0	0.0	0.0	0.0	0.0	0.0	0.0	0.0	0.0	0.0	0.0	0.0	0.0	0.0	0.0	0.0	0.0	0.0	0.0	0.0	0.0	0.0	0.0	0.0	0.0	0.0
Fornicata	0.0	0.0	0.0	0.0	0.0	0.0	0.0	0.0	0.0	0.0	0.0	0.0	0.0	0.0	0.0	0.0	0.0	0.0	0.0	0.0	0.0	0.0	0.0	0.0	0.0	0.0	0.0	0.0	0.0	0.0	0.0	0.0	0.0	0.0	0.0	0.0	0.0	0.0	0.0	0.0	0.0	0.0	0.0	0.0	0.0	0.0	0.0	0.0	0.0
Chlamydiae	0.0	0.0	0.0	0.0	0.0	0.0	0.0	0.0	0.0	0.0	0.0	0.0	0.0	0.0	0.0	0.0	0.0	0.0	0.0	0.0	0.0	0.0	0.0	0.0	0.0	0.0	0.0	0.0	0.0	0.0	0.0	0.0	0.0	0.0	0.0	0.0	0.0	0.0	0.0	0.0	0.0	0.0	0.0	0.0	0.0	0.0	0.0	0.0	0.0
Candidatus_Cloacimonetes	0.0	0.0	0.0	0.0	0.0	0.0	0.0	0.0	17903581	0.0	0.0	0.0	0.0	0.0	17512258	0.0	0.0	0.0	16304891	0.0	0.0	13898612	0.0	0.0	0.0	0.0	0.0	0.0	0.0	0.0	0.0	0.0	0.0	0.0	0.9901979	0.0	16805042	0.0	0.71035516	0.0	0.0	0.0	0.0	0.0	0.0	20810404	0.0	0.0	0.0
Candidatus_Lokiarchaeota	0.0	0.0	0.0	0.0	0.0	0.0	0.0	0.0	0.0	0.0	0.0	0.0	0.0	0.0	0.0	0.0	0.0	0.0	0.0	0.0	0.0	0.0	0.0	0.0	0.0	0.0	0.0	0.0	0.0	0.0	0.0	0.0	0.0	0.0	0.0	0.0	0.0	0.0	0.0	0.0	0.0	0.0	0.0	0.0	0.0	0.20010006	0.0	0.0	0.0
Lenarviricota	0.3101241	0.0	0.0	0.0	0.13005202	0.0	0.0	0.0	0.0	0.0	0.0	0.0	0.0	0.0	0.0	0.0	0.0	0.0	0.0	0.11007703	0.0	0.0	0.0	0.0	0.0	0.11004402	0.0	0.0	0.0	0.0	0.0	0.0	0.0	0.0	0.0	0.0	0.0	0.0	0.0	0.0	0.0	0.0	0.0	0.0	0.0	0.11005503	0.160016	0.11006604	0.29011604
Perkinsozoa	0.0	0.0	0.0	0.0	0.0	0.0	0.0	0.0	0.0	0.0	0.0	0.0	0.0	0.0	0.0	0.0	0.0	0.0	0.0	0.0	0.0	0.0	0.0	0.0	0.0	0.0	0.0	0.0	0.0	0.0	0.0	0.0	0.0	0.0	0.0	0.0	0.0	0.0	0.0	0.0	0.0	0.0	0.0	0.0	0.0	0.10005003	0.0	0.0	0.0
Nematoda	0.0	0.0	0.0	0.0	0.0	0.0	0.0	0.0	0.0	0.0	0.0	0.0	0.0	0.110022	0.0	0.0	0.0	0.0	0.120036	0.0	0.0	0.0	0.0	0.0	0.10005004	0.0	0.37022218	0.0	0.0	0.0	0.0	0.0	0.0	0.0	0.0	0.0	0.0	0.0	0.0	0.0	0.0	0.0	0.0	0.0	0.0	0.10005003	0.0	0.0	0.0
Duplornaviricota	0.0	0.0	0.0	0.0	0.0	0.0	0.0	0.0	0.0	0.0	0.0	0.0	0.0	0.0	0.0	0.0	0.0	0.0	0.0	0.0	0.0	0.0	0.0	0.0	0.0	0.0	0.0	0.0	0.0	0.0	0.0	0.0	0.0	0.0	0.0	0.0	0.0	0.0	0.0	0.0	0.0	0.0	0.0	0.0	0.0	0.0	0.0	0.0	0.0
Echinodermata	0.0	0.0	0.0	0.0	0.0	0.0	0.0	0.0	0.0	0.0	0.0	0.0	0.11005503	0.0	0.0	0.0	0.0	0.0	0.0	0.0	0.0	0.0	0.0	0.0	0.0	0.12004802	0.0	0.0	0.0	0.0	0.0	0.0	0.0	0.0	0.0	0.0	0.0	0.0	0.0	0.0	0.0	0.0	0.0	0.0	0.0	0.0	0.0	0.0	0.0
Preplasmiviricota	0.0	0.0	0.0	0.0	0.0	0.0	0.0	0.0	0.0	0.0	0.0	0.0	0.0	0.0	0.0	0.0	0.0	0.0	0.0	0.0	0.0	0.0	0.0	0.0	0.0	0.0	0.0	0.0	0.0	0.0	0.0	0.0	0.0	0.0	0.0	0.0	0.0	0.0	0.0	0.0	0.0	0.0	0.0	0.0	0.0	0.0	0.0	0.0	0.0
Discosea	0.0	0.0	0.0	0.0	0.0	0.0	0.0	0.0	0.0	0.0	0.0	0.0	0.0	0.0	0.0	0.0	0.0	0.0	0.0	0.0	0.0	0.0	0.0	0.0	0.0	0.0	0.0	0.0	0.0	0.0	0.0	0.0	0.0	0.0	0.0	0.0	0.0	0.0	0.0	0.0	0.0	0.0	0.0	0.0	0.0	0.0	0.0	0.0	0.0
Nucleocytoviricota	0.0	0.0	0.0	0.0	0.0	0.0	0.0	0.0	0.0	0.0	0.0	0.0	0.47023514	0.0	0.0	0.0	0.0	0.0	0.0	0.0	0.0	0.0	0.0	0.0	0.0	0.0	0.0	0.0	0.0	0.0	0.0	0.0	0.0	0.0	0.0	0.0	0.0	0.0	0.0	0.0	0.0	0.0	0.0	0.0	0.0	0.0	0.0	0.0	0.0
Kiritimatiellaeota	0.0	0.0	0.0	0.0	0.0	0.0	0.0	0.0	0.0	0.0	0.0	0.0	0.0	0.0	0.0	0.0	0.0	0.0	0.0	0.0	0.0	0.0	0.0	0.0	0.0	0.0	0.0	0.0	0.0	0.0	0.0	0.0	0.0	0.0	0.0	0.0	0.0	0.0	0.0	0.0	0.0	0.0	0.0	0.0	0.0	0.0	0.0	0.0	0.0
Chloroflexi	0.0	0.0	0.0	0.0	0.0	0.0	0.0	0.0	0.0	0.0	0.0	0.0	0.0	0.0	0.0	0.0	0.0	0.0	0.0	0.0	0.0	0.0	0.0	0.0	0.0	0.0	0.0	0.0	0.10002001	0.0	0.0	0.0	0.0	0.0	0.0	0.0	0.0	0.0	0.0	0.0	0.0	0.0	0.0	0.0	0.0	0.0	0.0	0.0	0.0
Thermotogae	0.0	0.0	0.0	0.0	0.0	0.0	0.0	0.0	0.0	0.0	0.0	0.0	0.0	0.0	0.0	0.0	0.0	0.0	0.0	0.0	0.0	0.0	0.0	0.0	0.0	0.0	0.16009606	0.0	0.0	0.0	0.0	0.0	0.0	0.0	0.0	0.0	0.0	0.0	0.0	0.0	0.0	0.0	0.0	0.0	0.0	0.0	0.0	0.0	0.0
Preaxostyla	0.0	0.0	0.0	0.0	0.0	0.0	0.0	0.0	0.0	0.0	0.0	0.0	0.0	0.0	0.0	0.0	0.0	0.0	0.0	0.0	0.0	0.0	0.0	0.0	0.0	0.0	0.0	0.0	0.0	0.0	0.0	0.0	0.0	0.0	0.0	0.0	0.0	0.0	0.0	0.0	0.0	0.0	0.0	0.0	0.0	0.0	0.0	0.0	0.0
Aquificae	0.0	0.0	0.0	0.0	0.0	0.0	0.0	0.0	0.0	0.0	0.0	0.0	0.0	0.0	0.0	0.0	0.0	0.0	0.0	0.0	0.0	0.0	0.0	0.0	0.0	0.0	0.0	0.0	0.0	0.0	0.0	0.0	0.0	0.0	0.0	0.0	0.0	0.0	0.0	0.0	0.0	0.0	0.0	0.0	0.0	0.0	0.0	0.0	0.0
Acidobacteria	0.0	0.0	0.0	0.0	0.0	0.0	0.0	0.0	0.0	0.0	0.0	0.0	0.0	0.0	0.10007005	0.0	0.0	0.0	0.0	0.0	0.0	0.0	0.0	0.0	0.0	0.0	0.0	0.0	0.10002001	0.0	0.0	0.0	0.0	0.0	0.0	0.0	0.0	0.0	0.0	0.0	0.0	0.0	0.0	0.0	0.0	0.0	0.0	0.0	0.0
Rhodophyta	0.0	0.0	0.0	0.0	0.0	0.0	0.0	0.0	0.0	0.0	0.0	0.0	0.0	0.0	0.0	0.0	0.0	0.0	0.0	0.0	0.0	0.0	0.0	0.0	0.0	0.0	0.0	0.0	0.0	0.0	0.0	0.0	0.0	0.0	0.0	0.0	0.0	0.0	0.0	0.0	0.0	0.0	0.0	0.0	0.0	0.0	0.0	0.0	0.0
[truncated: 29 more columns]

## Sheet: RELATIVE_ABUNDANCE_PHYLUM
Taxa	F3_CON_R1	F3_CON_R1	F3_CON_R1	F3_CON_R1	F3_CON_R1	F3_CON_R1	F14_CON_R1	F14_CON_R2	F14_CON_R3	F14_CON_R4	F14_PFA_R1	F14_PFA_R2	F14_PFA_R3	F14_PFA_R4	F14_AGP_R1	F14_AGP_R2	F14_AGP_R3	F14_AGP_R4	F14_AGP+PFA_R1	F14_AGP+PFA_R2	F14_AGP+PFA_R3	F14_AGP+PFA_R4	F14_AB_R1	F14_AB_R2	F14_AB_R3	F14_AB_R4	F14_AB+PFA_R1	F14_AB+PFA_R2	F14_AB+PFA_R3	F14_AB+PFA_R4	F21_CON_R1	F21_CON_R2	F21_CON_R3	F21_CON_R4	F21_PFA_R1	F21_PFA_R2	F21_PFA_R3	F21_PFA_R4	F21_AGP_R1	F21_AGP_R2	F21_AGP_R3	F21_AGP_R4	F21_AGP+PFA_R1	F21_AGP+PFA_R2	F21_AGP+PFA_R3	F21_AGP+PFA_R4	F21_AB_R1	F21_AB_R2	F21_AB_R3
Firmicutes	0,8799521	0.928186	0.978994	0.964682	0.789516	0.956291	0.872987	0.905872	0.857472	0.829649	0.784592	0.903771	0.852326	0.833967	0.790753	0.849125	0.807265	0.744698	0.80134	0.804663	0.772063	0.844416	0.818864	0.881553	0.849025	0.77501	0.843406	0.863359	0.678936	0.795498	0.90035	0.825648	0.843322	0.809881	0.871774	0.819046	0.812044	0.906215	0.88004	0.785829	0.769631	0.927285	0.810248	0.821593	0.79538	0.753877	0.824182	0.756154	0.770108
Proteobacteria	0.0385154	0	0.0113034	0.0196098	0.0702281	0.0187037	0.0454045	0.036611	0.0457091	0.06652	0.118859	0.0314094	0.0421211	0.0476095	0.0811568	0.0537269	0.0786551	0.128051	0.0674202	0.078655	0.0944567	0.0390961	0.0741148	0.0396159	0.0356178	0.104242	0.0497298	0.0490147	0.122725	0.0748374	0.032016	0.0756227	0.0526263	0.0790079	0.0408082	0.0771231	0.0607182	0.0336303	0.0361181	0.0888711	0.108132	0.0187037	0.0693555	0.0582349	0.0864087	0.083942	0.0649065	0.10076	0.112445
Chordata	0.0554222	0.0697139	0.00350105	0.0113057	0.130852	0.0127025	0.0238024	0.0175053	0.0181036	0.0272082	0.0238119	0.0214064	0.0615308	0.034807	0.0378265	0.0237119	0.037126	0.0298119	0.0312094	0.0268188	0.0382229	0.0427957	0.0281056	0.0262105	0.0385193	0.0235094	0.0286172	0.0318095	0.111422	0.0673337	0.0268134	0.0182055	0.0355178	0.019802	0.0254051	0.0219066	0.0276083	0.0160144	0.0245123	0.0322258	0.0290087	0.0191038	0.0290232	0.0390234	0.030403	0.0376188	0.0347035	0.0386232	0.0256102
Actinobacteria	0.017507	0	0.00360108	0.00150075	0.0055022	0.00880176	0.0227023	0.0140042	0.0234047	0.0238071	0.0329165	0.0177053	0.0135068	0.0180036	0.0340238	0.0258129	0.034324	0.0462185	0.0327098	0.0348244	0.0402241	0.020198	0.0275055	0.0170068	0.0195098	0.0403161	0.0213128	0.023207	0.0421084	0.0224112	0.0196098	0.0378113	0.0269135	0.0464046	0.0211042	0.0314094	0.0336101	0.0165149	0.0191096	0.0372298	0.0398119	0.00840168	0.0379303	0.0265159	0.0308031	0.0387194	0.0292029	0.0518311	0.0403161
Streptophyta	0.00170068	0	0	0	0	0	0.00530053	0.00610183	0.00440088	0.0113034	0.0062031	0.00470141	0.00630315	0.0104021	0.0050035	0.0092046	0.00910637	0.0085034	0.00950285	0.0104073	0.00870522	0.00839916	0.0116023	0.0095038	0.0138069	0.0148059	0.00780468	0.00710213	0.0080016	0.0070035	0.00370185	0.00570171	0.00930465	0.00670067	0.0075015	0.00850255	0.0106032	0.00580522	0.0068034	0.010008	0.00860258	0.00630126	0.00980785	0.0121073	0.0115012	0.0107054	0.00840084	0.00730438	0.00640256
Bacteroidetes	0	0	0	0	0	0	0.00740074	0.0040012	0.00810162	0.00680204	0.0072036	0.00440132	0.0034017	0.0085017	0.0097068	0.00770385	0.00730511	0.0085034	0.00860258	0.00930651	0.0090054	0.00589941	0.00790158	0.00540216	0.0062031	0.0095038	0.0102061	0.00490147	0.00840168	0.00710355	0.0038019	0.00860258	0.00630315	0.00870087	0.00440088	0.00790237	0.00740222	0.00460414	0.0042021	0.00980785	0.0110033	0.0040008	0.00920737	0.00710426	0.00870087	0.00930465	0.0090009	0.0113068	0.0115046
Arthropoda	0	0	0	0	0	0	0.00430043	0.00290087	0.0025005	0.0050015	0.0032016	0.00230069	0.0028014	0.00560112	0.00330231	0.0050025	0.00430301	0.00330132	0.00620186	0.00520364	0.00440264	0.00429957	0.00570114	0.00420168	0.00630315	0.00520208	0.0145087	0.00360108	0.00410082	0.00330165	0.00190095	0.00360108	0.00430215	0.00370037	0.00290058	0.00510153	0.0060018	0.00310279	0.00390195	0.00630504	0.00470141	0.0040008	0.00560448	0.00580348	0.00630063	0.00570285	0.00460046	0.00430258	0.00390156
Ascomycota	0	0	0	0	0	0	0.00260026	0.00170051	0.00220044	0.00310093	0.00250125	0.00180054	0.0022011	0.00240048	0.00230161	0.0026013	0.00250175	0.00320128	0.00310093	0.00350245	0.00380228	0.00259974	0.00320064	0.00210084	0.0044022	0.00310124	0.00280168	0.00240072	0.00420084	0.002001	0.00150075	0.00290087	0.00330165	0.00350035	0.00260052	0.00350105	0.00380114	0.00230207	0.00270135	0.00360288	0.00370111	0.0015003	0.00460368	0.00370222	0.00390039	0.00430215	0.00440044	0.00420252	0.00390156
Bacillariophyta	0	0	0	0	0	0	0	0	0.00110022	0	0.00130065	0	0	0.00130026	0	0	0.0010007	0	0	0	0	0	0	0.0015006	0	0	0.00170102	0	0	0	0	0	0	0	0	0	0	0	0	0	0	0	0	0.00140084	0	0	0	0	0
Cyanobacteria	0	0	0	0	0	0	0.00130013	0	0.00140028	0.00120036	0.00170085	0.0010003	0	0.00110022	0.00190133	0.0014007	0.00140098	0.00170068	0.00160048	0.00160112	0.0020012	0.0009999	0.00180036	0.00130052	0.00130065	0.00160064	0.00140084	0.00110033	0.00180036	0.0012006	0	0.00180054	0.00110055	0.00170017	0.0010002	0.00180054	0.00160048	0	0.00110055	0.00220176	0.00270081	0	0.00230184	0.0015009	0.00210021	0.002001	0.00170017	0.00290174	0.00260104
Apicomplexa	0	0	0	0	0	0	0	0	0	0.00450135	0	0	0	0.0103021	0	0.0010005	0	0	0.00160048	0.00150105	0.00240144	0.00159984	0.0015003	0.0010004	0.0028014	0	0.0010006	0.00110033	0	0	0	0	0.00230115	0	0	0.00190057	0.00160048	0	0	0.00120096	0	0.0010002	0.0015012	0.00160096	0.00260026	0.00150075	0	0	0
Other	0.00380152	0.00210042	0.00260078	0.00290145	0.00260104	0.0035007	0.0109011	0.0103031	0.0120024	0.0124037	0.0118059	0.00940282	0.0086043	0.0113023	0.0103072	0.0114057	0.0116081	0.0106042	0.0116035	0.0111078	0.0109065	0.010199	0.0117023	0.0106042	0.0122061	0.0119048	0.0095057	0.0114034	0.00960192	0.0131066	0.0103052	0.00960288	0.0106053	0.00990099	0.0105021	0.0116035	0.0109033	0.0105095	0.0144072	0.0123098	0.0109033	0.00970194	0.0115092	0.0108065	0.0111011	0.0109055	0.0117012	0.0109065	0.0118047
Tenericutes	0	0	0	0	0	0	0.00110011	0	0	0.00310093	0.00250125	0	0	0.00220044	0.00170119	0.00290145	0.00130091	0.00180072	0.00270081	0.00140098	0.00230138	0.00149985	0.00220044	0	0.00110055	0.00180072	0.00160096	0.0010003	0.00130026	0.00190095	0	0.00130039	0.0010005	0.00120012	0	0.00190057	0.00160048	0.00130117	0	0.00420336	0.00170051	0	0.00220176	0.00170102	0.00380038	0.0038019	0.00140014	0.00110066	0.00120048
Planctomycetes	0	0	0	0	0	0	0.0010001	0	0.0010002	0	0.00110055	0	0	0	0.00140098	0.00110055	0.00140098	0.00160064	0.00130039	0.00140098	0.00140084	0	0.00120024	0	0	0.00160064	0	0	0.00190038	0	0	0.00140042	0.00110055	0.00170017	0	0.00120036	0.00130039	0	0	0.00130104	0.00210063	0	0.0015012	0.00120072	0.00130013	0.0016008	0.0010001	0.00230138	0.0020008
Mollusca	0	0	0	0	0	0	0	0.0010003	0	0.00340102	0	0.0010003	0.0014007	0.0090018	0	0.00110055	0	0.00330132	0.00150045	0.00480336	0.0010006	0	0.00220044	0	0.0014007	0	0	0	0	0	0	0.00130039	0.00130065	0.00280028	0.00110022	0.00430129	0.00110033	0	0	0	0.00180054	0	0.00120096	0.00430258	0	0.0054027	0	0.00110066	0.0010004
Spirochaetes	0	0	0	0	0	0	0.00120012	0	0	0.0010003	0.0010005	0	0	0.00120024	0.00110077	0.0014007	0.00110077	0.00110044	0.00110033	0.00140098	0.00140084	0	0.00130026	0	0	0.00130052	0	0	0.00120024	0	0	0.0020006	0.0010005	0.00130013	0.0010002	0.00170051	0.00120036	0	0	0.0015012	0.00150045	0	0.00180144	0.00120072	0.00140014	0.00150075	0.00120012	0.0020012	0.00180072
Deinococcus-Thermus	0	0	0	0	0	0	0	0	0	0	0.00130065	0	0	0	0.0010007	0	0	0.00140056	0	0	0.00130078	0	0	0	0	0.0010004	0	0	0.00120024	0	0	0.00110033	0	0.00140014	0	0.00110033	0.00110033	0	0	0.00130104	0.00150045	0	0.00120096	0	0.00130013	0.00110055	0.0010001	0.00190114	0.00140056
Euryarchaeota	0	0	0	0	0	0	0	0	0	0.0010003	0	0	0	0	0	0.0010005	0	0.00120048	0.0010003	0.00110077	0.00110066	0	0.00110022	0	0	0.00110044	0	0	0.00110022	0	0	0.00230069	0	0.0010001	0	0	0	0	0	0	0.00120036	0	0.0010008	0.00110066	0.0010001	0.00110055	0.0010001	0.00110066	0.00110044
Basidiomycota	0	0	0	0	0	0	0	0	0	0	0	0	0	0	0	0	0	0.0010004	0	0	0	0	0	0	0	0.00170068	0	0	0	0	0	0.00110033	0	0.00130013	0	0	0.0010003	0	0	0.0010008	0.0010003	0	0	0	0	0	0	0.00110066	0
Chlorophyta	0	0	0	0	0	0	0	0	0	0	0	0	0	0	0	0	0.00160112	0	0	0.00120084	0	0.0009999	0	0	0	0	0	0	0	0	0	0	0	0	0	0	0	0	0	0	0.0010003	0	0	0.00110066	0.0010001	0	0	0	0
Fusobacteria	0	0	0	0	0	0	0	0	0	0	0	0	0	0.00120024	0	0	0	0	0	0	0	0	0	0	0	0	0.00110066	0	0	0	0	0	0	0	0	0	0	0	0	0.00110088	0	0	0	0	0.0010001	0.0010005	0	0	0
Negarnaviricota	0	0	0	0	0	0	0	0	0	0	0	0	0	0	0	0.0018009	0	0	0	0	0	0	0	0	0	0	0	0	0	0	0	0	0	0	0	0	0	0	0	0	0	0	0	0	0	0	0	0	0
Uroviricota	0	0	0	0	0	0	0	0	0.00160032	0	0	0.00110033	0	0	0	0	0	0.0020008	0	0	0.00270162	0.00309969	0	0	0.00510255	0	0	0	0	0.00430215	0	0	0	0	0	0	0	0	0	0	0	0	0	0	0	0	0	0	0
Peploviricota	0	0	0	0	0	0	0	0	0	0	0	0	0	0	0	0	0	0.0020008	0	0	0.00260156	0	0	0	0.00170085	0	0	0	0	0	0	0	0	0	0	0	0	0	0	0	0	0	0	0	0	0	0	0	0
Phixviricota	0	0	0	0	0	0	0	0	0.00310062	0	0	0	0	0	0	0	0	0	0	0	0	0	0	0	0	0	0	0	0	0	0	0	0	0	0	0	0	0	0	0	0	0	0	0	0	0	0	0	0
Verrucomicrobia	0	0	0	0	0	0	0	0	0	0	0	0	0	0	0	0	0	0	0	0	0	0	0	0	0	0	0	0	0	0	0	0	0	0	0	0	0	0	0	0	0	0	0	0	0	0	0	0	0
Euglenozoa	0	0	0	0	0	0	0	0	0	0	0	0	0	0	0	0	0	0	0	0	0	0	0	0	0	0	0	0	0	0	0	0	0	0	0	0	0	0	0	0	0	0	0	0	0	0	0	0	0
Fornicata	0	0	0	0	0	0	0	0	0	0	0	0	0	0	0	0	0	0	0	0	0	0	0	0	0	0	0	0	0	0	0	0	0	0	0	0	0	0	0	0	0	0	0	0	0	0	0	0	0
Chlamydiae	0	0	0	0	0	0	0	0	0	0	0	0	0	0	0	0	0	0	0	0	0	0	0	0	0	0	0	0	0	0	0	0	0	0	0	0	0	0	0	0	0	0	0	0	0	0	0	0	0
Candidatus_Cloacimonetes	0	0	0	0	0	0	0	0	0.0179036	0	0	0	0	0	0.0175123	0	0	0	0.0163049	0	0	0.0138986	0	0	0	0	0	0	0	0	0	0	0	0	0.00990198	0	0.016805	0	0.00710355	0	0	0	0	0	0	0.0208104	0	0	0
Candidatus_Lokiarchaeota	0	0	0	0	0	0	0	0	0	0	0	0	0	0	0	0	0	0	0	0	0	0	0	0	0	0	0	0	0	0	0	0	0	0	0	0	0	0	0	0	0	0	0	0	0	0.002001	0	0	0
Lenarviricota	0.00310124	0	0	0	0.00130052	0	0	0	0	0	0	0	0	0	0	0	0	0	0	0.00110077	0	0	0	0	0	0.00110044	0	0	0	0	0	0	0	0	0	0	0	0	0	0	0	0	0	0	0	0.00110055	0.00160016	0.00110066	0.00290116
Perkinsozoa	0	0	0	0	0	0	0	0	0	0	0	0	0	0	0	0	0	0	0	0	0	0	0	0	0	0	0	0	0	0	0	0	0	0	0	0	0	0	0	0	0	0	0	0	0	0.0010005	0	0	0
Nematoda	0	0	0	0	0	0	0	0	0	0	0	0	0	0.00110022	0	0	0	0	0.00120036	0	0	0	0	0	0.0010005	0	0.00370222	0	0	0	0	0	0	0	0	0	0	0	0	0	0	0	0	0	0	0.0010005	0	0	0
Duplornaviricota	0	0	0	0	0	0	0	0	0	0	0	0	0	0	0	0	0	0	0	0	0	0	0	0	0	0	0	0	0	0	0	0	0	0	0	0	0	0	0	0	0	0	0	0	0	0	0	0	0
Echinodermata	0	0	0	0	0	0	0	0	0	0	0	0	0.00110055	0	0	0	0	0	0	0	0	0	0	0	0	0.00120048	0	0	0	0	0	0	0	0	0	0	0	0	0	0	0	0	0	0	0	0	0	0	0
Preplasmiviricota	0	0	0	0	0	0	0	0	0	0	0	0	0	0	0	0	0	0	0	0	0	0	0	0	0	0	0	0	0	0	0	0	0	0	0	0	0	0	0	0	0	0	0	0	0	0	0	0	0
Discosea	0	0	0	0	0	0	0	0	0	0	0	0	0	0	0	0	0	0	0	0	0	0	0	0	0	0	0	0	0	0	0	0	0	0	0	0	0	0	0	0	0	0	0	0	0	0	0	0	0
Nucleocytoviricota	0	0	0	0	0	0	0	0	0	0	0	0	0.00470235	0	0	0	0	0	0	0	0	0	0	0	0	0	0	0	0	0	0	0	0	0	0	0	0	0	0	0	0	0	0	0	0	0	0	0	0
Kiritimatiellaeota	0	0	0	0	0	0	0	0	0	0	0	0	0	0	0	0	0	0	0	0	0	0	0	0	0	0	0	0	0	0	0	0	0	0	0	0	0	0	0	0	0	0	0	0	0	0	0	0	0
Chloroflexi	0	0	0	0	0	0	0	0	0	0	0	0	0	0	0	0	0	0	0	0	0	0	0	0	0	0	0	0	0.0010002	0	0	0	0	0	0	0	0	0	0	0	0	0	0	0	0	0	0	0	0
Thermotogae	0	0	0	0	0	0	0	0	0	0	0	0	0	0	0	0	0	0	0	0	0	0	0	0	0	0	0.00160096	0	0	0	0	0	0	0	0	0	0	0	0	0	0	0	0	0	0	0	0	0	0
Preaxostyla	0	0	0	0	0	0	0	0	0	0	0	0	0	0	0	0	0	0	0	0	0	0	0	0	0	0	0	0	0	0	0	0	0	0	0	0	0	0	0	0	0	0	0	0	0	0	0	0	0
Aquificae	0	0	0	0	0	0	0	0	0	0	0	0	0	0	0	0	0	0	0	0	0	0	0	0	0	0	0	0	0	0	0	0	0	0	0	0	0	0	0	0	0	0	0	0	0	0	0	0	0
Acidobacteria	0	0	0	0	0	0	0	0	0	0	0	0	0	0	0.0010007	0	0	0	0	0	0	0	0	0	0	0	0	0	0.0010002	0	0	0	0	0	0	0	0	0	0	0	0	0	0	0	0	0	0	0	0
Rhodophyta	0	0	0	0	0	0	0	0	0	0	0	0	0	0	0	0	0	0	0	0	0	0	0	0	0	0	0	0	0	0	0	0	0	0	0	0	0	0	0	0	0	0	0	0	0	0	0	0	0
	0	0	0	0	0	0	0	0	0	0	0	0	0	0	0	0	0	0	0	0	0	0	0	0	0	0	0	0	0	0	0	0	0	0	0	0	0	0	0	0	0	0	0	0	0	0	0	0	0
[truncated: 29 more columns]

## Sheet: RELATIVE_ABUNDANCE_GENUS
Taxa	F3_CON_R1	F3_CON_R1	F3_CON_R1	F3_CON_R1	F3_CON_R1	F3_CON_R1	F14_CON_R1	F14_CON_R2	F14_CON_R3	F14_CON_R4	F14_PFA_R1	F14_PFA_R2	F14_PFA_R3	F14_PFA_R4	F14_AGP_R1	F14_AGP_R2	F14_AGP_R3	F14_AGP_R4	F14_AGP+PFA_R1	F14_AGP+PFA_R2	F14_AGP+PFA_R3	F14_AGP+PFA_R4	F14_AB_R1	F14_AB_R2	F14_AB_R3	F14_AB_R4	F14_AB+PFA_R1	F14_AB+PFA_R2	F14_AB+PFA_R3	F14_AB+PFA_R4	F21_CON_R1	F21_CON_R2	F21_CON_R3	F21_CON_R4	F21_PFA_R1	F21_PFA_R2	F21_PFA_R3	F21_PFA_R4	F21_AGP_R1	F21_AGP_R2	F21_AGP_R3	F21_AGP_R4	F21_AGP+PFA_R1	F21_AGP+PFA_R2	F21_AGP+PFA_R3	F21_AGP+PFA_R4	F21_AB_R1	F21_AB_R2	F21_AB_R3
Blautia	3.165	0	1.3261	0.231156	0	0.21097	10.973	7.42886	11.6284	7.89769	8.1257	6.51135	5.61126	4.61711	8.77979	9.80212	6.53834	8.78247	10.5708	11.7443	13.9407	5.42549	15.0833	16.4246	7.99796	15.0769	25.3504	5.04578	11.6979	13.0077	4.79292	7.12484	4.2879	6.79019	6.39381	9.85011	4.8071	5.48588	2.5056	4.55195	10.0827	4.61507	13.2068	10.7936	8.09873	13.8667	8.62613	6.38059	15.3156
Lacrimispora	0.151194	0	1.27587	0.291457	0	0	3.0056	1.84959	3.89307	3.77051	3.21367	1.5261	2.16753	3.27469	5.90752	3.64137	5.27549	3.0056	4.02889	4.52646	4.7488	2.03583	2.8326	3.57542	2.86006	3.35946	3.99147	1.37335	3.81145	4.12267	1.24148	3.0881	1.43951	2.67739	1.44573	2.66136	3.3068	1.35617	1.91485	3.42927	4.56169	1.36931	3.75587	2.64209	3.24357	5.82465	3.89042	4.00571	4.57836
Romboutsia	0.594698	0	0	0	0	0	2.29241	0.772358	1.45355	5.77805	3.09163	2.36036	1.70161	11.38	1.34447	7.03795	5.00051	1.07998	3.79489	7.04455	2.57821	8.9373	7.30136	10.6552	7.67109	1.50667	3.60553	13.469	2.06792	1.76686	3.01211	2.92663	7.48341	1.85279	0.590511	2.01897	6.30741	4.95564	2.35282	6.98102	2.1941	18.8863	3.66401	4.18843	10.1999	4.05682	3.64599	1.28427	1.75385
Lachnoclostridium	0.372946	0	0.391802	0.301508	0	0.100462	4.79878	9.8374	15.928	6.51177	15.0412	3.54054	7.04953	5.90868	12.7012	14.8205	5.7847	11.7983	7.24387	16.7397	9.67084	10.8815	15.3901	3.20975	8.27375	12.9696	5.63681	3.44863	5.19007	12.368	3.92795	6.95327	6.28892	11.412	6.53635	13.1233	11.8596	3.43632	3.45284	14.1764	14.0525	1.64317	8.25679	7.05581	14.2697	7.6027	17.0588	14.2697	15.3564
Mediterraneibacter	0.413265	0	0.37171	0.874372	0.140888	0.120555	3.52522	1.91057	5.15349	14.8578	4.56626	2.67576	2.41061	11.8682	3.49358	4.82456	11.7935	5.07387	15.729	6.18819	4.72842	6.48412	4.67328	2.34637	3.41164	5.20208	3.80865	5.28993	4.33857	3.66572	1.33306	12.7157	1.76621	4.37748	1.32356	4.30305	6.53194	2.28408	5.12324	4.8071	3.12277	1.54174	3.3068	5.46851	5.76295	5.23196	9.21682	3.82224	4.4458
Flavonifractor	0.171354	0	0.311433	0	0	0	1.98676	1.61585	1.21976	3.13869	4.31201	2.09584	0.790033	1.85091	2.07782	1.91759	4.45056	4.6052	2.51297	2.74238	5.75767	1.83225	1.87136	1.81818	1.64454	4.00081	1.57424	1.20041	3.11201	2.12226	1.14989	2.89636	1.53139	5.65001	1.83262	2.27389	3.93958	1.22362	1.51762	2.99041	3.11256	0.43615	1.8269	1.18792	1.62179	2.69773	2.83125	4.51534	1.80483
Faecalibacterium	0	0	0	0	0.44279	0.130601	1.38563	0.660569	0.904655	1.05982	0.894945	0.864788	0.405145	0.793247	1.19169	1.09139	0.987881	2.87315	1.54644	1.3457	0.937532	0.610749	1.56458	0.487557	0.592441	1.82225	0.995328	1.05799	3.51749	0.924046	1.24148	2.44222	5.50281	4.24514	1.00794	2.05975	2.37804	2.75314	0.662049	1.51051	1.80631	0.365149	1.85752	0.768049	1.86658	1.9722	0.835115	1.64101	2.14133
Candidatus_Cloacimonas	0	0	0	0	0	0	1.73204	0	2.09392	0	0	0	0	0	2.16948	0	0	0	2.04497	0	0	1.53705	0	0	0	0	0	0	0	0	0.92602	0	0	0	1.1912	0	2.10247	0	0.81483	2.17391	0.122461	0	2.14329	1.85356	0	2.61598	2.65811	3.26164	0.101968
Oscillibacter	0	0	0	0	0	0	1.51808	1.27033	0.437081	3.3527	1.85091	0.773222	1.37749	2.5628	1.34447	2.35618	1.87392	9.73	2.12636	2.02875	2.35402	4.3974	0.787402	1.74708	2.43105	3.87865	0.863295	2.49237	3.91282	2.37612	0.508802	1.52387	0.929045	1.46595	1.0283	2.76333	1.22474	0.611808	1.2528	1.44928	1.57159	0.882442	1.69422	3.89145	1.89718	1.6963	1.42581	3.3228	3.05904
Ruminococcus	0	0	0	0	0	0	1.02904	0.579268	1.13844	1.38592	1.078	0.549395	0.648233	0.925455	1.04909	1.19339	1.43599	1.12073	1.54644	1.68213	1.70182	0.702362	1.27825	0.782123	0.898876	1.26234	1.34065	0.956256	1.6219	1.19821	0.630915	1.82662	0.796325	1.36415	0.845042	1.18283	1.06144	0.581217	0.784274	1.75546	1.3879	0.456436	1.70443	1.26984	1.58099	1.62477	1.46654	2.0793	2.50841
Enterococcus	48.6443	9.61307	41.9228	20.5126	16.9065	24.7338	9.15945	5.93496	12.8075	1.9464	3.77301	9.62458	1.18505	6.22394	1.40558	1.94818	2.90254	1.06979	8.4444	0.795188	5.7271	17.2537	1.38051	9.23311	20.1532	1.98514	0.53829	1.53611	2.61531	7.92039	9.54513	1.53396	7.28943	6.4237	0.671961	1.42755	2.4801	1.15224	0.458342	0.785875	0.551077	2.34304	1.0002	0.706605	0.622195	0.899244	0.753641	0.896952	0.917712
Flintibacter	0.110876	0	0	0	0	0	0.906775	0.650406	0.894491	1.05982	1.45429	0.803744	0.719133	1.02715	0.967611	1.20359	1.81281	1.7728	1.29209	2.3142	2.42535	0.620928	1.16576	0.761808	0.766088	1.0282	1.33049	0.834181	1.60162	0.964663	0.854788	1.4835	1.38846	2.59595	1.00794	1.23381	1.42886	0.601611	0.896313	2.18412	1.52056	0.385435	1.43907	1.36201	1.46879	1.89046	1.25267	2.65009	1.38676
Roseburia	0.151194	0	0.110508	0	0	0	1.19205	0.853658	1.58569	1.44706	1.617	0.651134	0.658361	1.24072	1.69077	1.60139	1.31378	1.29394	1.9941	1.98797	1.77316	1.21132	1.63616	1.33062	1.02145	1.74081	1.80784	0.773143	1.27724	1.36068	0.569859	1.54405	0.847371	1.38451	0.66178	1.62129	1.3268	0.744366	0.631493	1.61257	1.84713	0.517294	1.50031	1.2084	1.67279	1.51236	2.0165	1.75313	2.12093
Massilistercora	0.100796	0	0	0	0	0	1.243	0.792683	1.2096	1.6203	1.32208	0.732526	0.627975	1.44412	1.43614	1.44839	1.48691	1.86449	1.72958	1.95739	1.57954	1.28257	1.17599	0.883697	1.08274	1.81207	1.26955	0.925738	1.30765	1.29976	0.48845	1.52387	0.653394	1.34378	0.570149	1.32558	1.52072	0.723973	0.763903	1.38804	1.25523	0.507151	1.46969	1.61802	1.81559	1.65543	2.04705	1.85506	2.08015
Escherichia	3.3162	0	0.964436	1.73869	6.55127	1.63753	0.376974	0.182927	0.538727	0.489147	7.06804	0.172958	0.324116	1.33225	2.94357	0.550796	2.28129	4.10596	1.73975	1.97778	3.41384	0.946662	0.194294	0.426612	0.265577	1.76117	0.68048	0.366226	3.81145	1.46223	0.111936	0.766979	1.06177	0.51919	0.234168	0.25492	0.836905	0.448659	0.580566	2.05144	0.714358	0.223146	0.326597	0.501792	0.683395	2.15614	0.886037	1.14158	1.18283
Enterocloster	0.100796	0	0	0	0	0	0.825268	0.640244	0.752185	0.917151	0.823757	0.356089	0.425403	0.722058	1.31391	0.785394	0.77401	0.866021	1.02757	1.37629	1.30439	0.508958	0.76695	1.097	0.745659	1.35397	1.32033	0.325534	1.07451	0.86312	0.345986	0.71652	0.408372	0.773694	0.468336	0.825941	0.673607	0.367085	0.427786	0.836906	1.25523	0.314433	0.87773	0.593958	0.611995	0.899244	0.661982	1.09061	1.07066
Hungatella	0	0	0	0	0	0	0.723383	0.365854	0.742021	0.5401	0.752568	0.356089	0.303859	0.6407	1.30373	0.703794	0.651798	0.703006	1.0174	1.08064	1.26363	0.427525	0.582882	0.629761	0.500511	0.977298	1.05627	0.406918	0.851495	0.720959	0.417218	0.787163	0.367534	0.743154	0.397068	0.744366	0.663401	0.356888	0.458342	0.95938	1.05113	0.294147	1.01041	0.583717	0.724194	0.84815	0.672166	1.10081	1.23381
Clostridium	2.03609	0.160385	0.100462	0.311558	0.221395	0.170786	0.845644	1.0874	1.2096	1.67125	1.23055	0.610439	0.627975	5.26798	1.02872	1.35659	1.37489	1.07998	1.4447	1.36609	1.2942	1.18078	1.63616	0.924327	1.16445	1.04856	1.34065	1.03764	1.29752	1.47238	0.498626	1.03946	0.898417	0.885676	0.570149	1.19303	1.1533	0.713776	0.590752	2.10247	1.27564	1.06502	1.20433	1.17768	1.59119	1.43062	1.29341	1.31485	1.33578
Intestinimonas	0.201593	0	0	0	0	0	0.560367	0.640244	0.528563	0.89677	0.772907	0.518873	0.303859	0.549171	0.631493	0.611995	1.19157	1.11054	0.712178	0.886941	1.17191	0.396987	0.623786	0.39614	0.592441	1.01802	0.507821	0.549339	0.851495	0.528026	0.417218	0.807347	0.735069	1.40487	0.529424	0.754563	1.02062	0.407872	0.580566	1.01041	0.938871	0.243432	0.806287	0.675883	0.744594	1.50215	0.702719	1.55947	0.887121
Ruthenibacterium	0	0	0	0	0.161014	0	0.713194	0.365854	0.528563	0.642006	0.671209	0.437481	0.303859	0.152548	0.753718	0.703794	0.203687	1.04941	0.712178	0.784993	0.90696	0.142508	0.777176	0.426612	0.439224	0.763514	0.192972	0.539166	0.800811	0.619415	0.345986	1.1101	0.500255	1.19108	0.478518	0.805547	0.806287	0.438462	0.4176	1.05123	0.87764	0	0.898142	0.604198	0.907793	1.02187	0.61106	1.09061	1.00948
Turicibacter	0.171354	0	0	0	0	0	0	0	0	0	0.254246	0	0	0.844097	0	4.37577	0	0	0.172958	2.10011	1.09039	0	0	0.528187	0	0	0.457038	0.142421	0	0	0	0.151378	0.112302	0.722793	0	0.275314	0.938967	1.92719	0.142595	4.08247	0	0.365149	1.74525	4.24987	6.22195	0.919681	1.45636	0.489247	0.214133
Anaerostipes	0	0	0	0	0	0	0.621498	0.630081	0.782679	1.34515	1.06783	0.559569	0.425403	0.996644	0.957425	1.43819	1.64986	0.641875	1.31244	0.988888	0.764292	1.09935	0.961244	0.43677	0.868233	1.31324	0.65001	1.14954	0.719716	1.65516	0.345986	0.948632	0.602348	0.600631	0.285074	1.57031	1.05123	0.418069	0.39723	2.63319	4.90866	0.902728	2.29639	1.05479	2.09098	0.735745	3.7682	5.27979	1.87621
Bacillus	0	0	0.100462	0	0	0	0.825268	0.315041	0.620045	1.22287	0.823757	0.549395	0.303859	1.44412	0.998167	1.65239	1.85355	0.641875	0.925832	1.48843	1.0802	1.2215	1.20667	0.629761	0.858018	0.55991	0.477351	0.813835	0.952864	0.619415	0.295105	0.797255	1.21491	1.10964	0.447974	0.948302	1.10227	0.744366	0.509269	2.10247	0.949076	1.54174	1.1533	1.83308	1.61159	0.889025	1.06936	1.40658	0.79535
Dysosmobacter	0	0	0	0	0	0	0.234335	0.264228	0.193129	0.713339	0.579681	0.264523	0.253216	0.477982	0.39723	0.428397	0.712904	1.44677	0.518873	0.54032	0.713339	3.31841	0.276102	0.487557	0.337079	0.570091	0.223441	0.457782	0.780537	0.416328	0.183169	0.464224	0.490046	0.52937	0.488699	0.428265	0.520514	0.214133	0.39723	0.47969	0.653128	0.142002	0.622576	0.583717	0.407997	0.418966	0.274977	1.40658	0.662792
Pseudomonas	0	0	0	0	0	0	0.387163	0.27439	0.376093	0.438194	0.386454	0.356089	0.253216	0.366114	0.468527	0.428397	0.478664	0.652063	0.529047	0.581099	0.642006	0.254479	0.552204	0.335195	0.306435	0.580271	0.406256	0.356053	0.861632	0.345248	0.356162	0.82753	0.408372	0.844956	0.397068	0.601611	0.530721	0.295707	0.315747	0.632782	0.755179	0.142002	0.694019	0.430107	0.540596	0.664214	0.407373	0.835797	0.723973
Anaerobutyricum	0	0	0	0	0	0	0.753948	0.985772	0.60988	0.805055	2.30855	0.396785	1.38762	0.864436	0.621308	1.10159	0.407374	0.315843	0.681656	0.825772	0.591053	0.36645	0.807854	0.243779	0.296221	0.590451	0.802357	0.712106	0.425748	1.1576	0.366338	0.696337	0.663604	0.417388	0.49888	1.05027	0.520514	0.469053	0.315747	0.796081	1.16338	0.284004	0.755256	0.481311	0.846593	0.490497	1.12028	0.550403	0.968696
Lactobacillus	25.3906	81.2149	50.4822	72.2915	48.9182	59.7046	26.9893	46.4431	12.1671	16.2132	3.70182	16.5632	50.785	0.823757	21.7254	10.0775	15.1034	1.6811	3.22515	2.40595	3.42403	9.60912	6.34012	17.7654	2.54341	2.34144	19.9066	36.5615	6.22403	2.96507	46.3112	16.702	26.1766	6.271	51.7512	16.1721	6.7871	44.1521	55.3575	2.88834	4.69436	11.279	3.10267	2.54992	0.979192	2.19702	4.37926	3.84263	0.846334
Butyrivibrio	0	0	0	0	0	0	0.305655	0.162602	0.447245	0.305717	0.437303	0.15261	0.162058	0.284755	0.519454	0.499796	0.315714	0.366786	0.468003	0.417983	0.428004	0.315554	0.378362	0.203149	0.194076	0.397027	0.446882	0.193286	0.314242	0.436637	0.132289	0.393582	0.193976	0.325766	0.152718	0.356888	0.306185	0.173346	0.162966	0.47969	0.449025	0.111573	0.39804	0.358423	0.387597	0.408747	0.417558	0.448476	0.489446
Corynebacterium	0	0	0	0	0.181141	0	0.264901	0.142276	0.213458	0.234383	0.579681	0.15261	0.141801	0.132208	0.560196	0.275398	0.529586	0.519613	0.406959	0.428178	0.458575	0.183225	0.347684	0.152362	0.163432	0.366487	0.233597	0.213632	0.425748	0.284322	0.234049	0.464224	0.255232	0.366487	0.173081	0.387478	0.367422	0.152952	0.173151	0.489896	0.398	0	0.387834	0.235535	0.295798	0.592683	0.264793	0.397513	0.438462
Paenibacillus	0	0	0	0	0	0	0.489047	0.315041	0.406587	0.458575	0.508492	0.335741	0.212701	0.355944	0.55001	0.571196	0.448111	0.590932	0.549395	0.632073	0.611434	0.315554	0.572656	0.35551	0.367722	0.590451	0.457038	0.305188	0.557527	0.39602	0.264577	0.615602	0.316488	0.53955	0.376705	0.550627	0.571545	0.295707	0.295376	0.581751	0.683743	0.213003	0.61237	0.512033	0.540596	0.613121	0.590691	0.642136	0.642398
Mycobacterium	0	0	0	0	0	0	0.142639	0	0.15247	0.18343	0.325435	0.132262	0	0.111868	0.203707	0.183599	0.315714	0.33622	0.254349	0.275257	0.397432	0.142508	0.224972	0	0.132789	0.213784	0.162503	0.142421	0.405474	0.172624	0.142465	0.413765	0.255232	0.509009	0.142537	0.25492	0.285773	0.142755	0	0.336803	0.336769	0	0.306185	0.174091	0.234598	0.439403	0.203687	0.285394	0.275314
Gallus	4.13265	4.67121	0	0.623116	11.8647	0.492264	0.529801	0	0.264281	0.112096	0.376284	0	0.243087	0.569511	1.30373	0.101999	0.387005	0.122262	0.376437	0.132531	0.815245	0.855049	0.10226	0.192991	0.143003	0.132342	0.101564	0.610376	8.30208	2.40658	1.61799	0.201837	0.153139	0	0	0.142755	0	0	0.162966	0.234742	0.591897	0.30429	0	0.184332	0.142799	0.459841	0	0.234431	0
Streptomyces	0	0	0	0	0	0	0.20377	0.142276	0.213458	0.224192	0.305095	0.172958	0.141801	0.213567	0.356488	0.265198	0.346268	0.53999	0.417133	0.356815	0.417813	0.152687	0.245424	0.233621	0.194076	0.356307	0.264067	0.233978	0.435884	0.223396	0.183169	0.484408	0.357325	0.580271	0.305437	0.305904	0.34701	0.142755	0.254634	0.34701	0.479641	0	0.39804	0.327701	0.356997	0.439403	0.356452	0.601366	0.418069
Mastigoproctus	0	0	0	0	0	0	0	0	0	0.132477	0	0	0	0.183057	0	0.183599	0	0	0.122088	0	0	0.142508	0.10226	0	0.132789	0	0	0	0	0	0	0	0	0	0	0.122362	0.163299	0	0	0.214329	0	0.131859	0.122474	0.133129	0.142799	0	0.132396	0	0
Christensenella	0	0	0	0	0	0	0.173204	0.101626	0.132141	0.254764	0.183057	0.111914	0.131672	0.152548	0.203707	0.183599	0.193502	0.346409	0.254349	0.234479	0.285336	0.142508	0.184068	0.132047	0.183861	0.274865	0.162503	0.132248	0.223011	0.142161	0.111936	0.292663	0.173558	0.223964	0.152718	0.214133	0.224536	0.112165	0.142595	0.316391	0.275538	0	0.285773	0.225294	0.224398	0.286123	0.285161	0.448476	0.336494
Streptococcus	5.08013	1.81435	1.0649	1.15578	10.9993	10.0261	4.53388	3.56707	4.89937	0.254764	5.14594	33.157	1.74213	12.2241	0.336117	1.72379	0.193502	0.193581	0.15261	0.183505	0.152858	0.101792	6.923	0.700863	14.5761	0.386847	0.264067	0.844354	0.699442	4.59992	7.84573	6.51933	7.95304	7.63514	3.66524	4.08892	12.9822	11.4918	4.37971	4.10288	2.77579	39.1622	15.5542	20.3482	2.89678	6.25383	3.71728	0.315972	2.2331
Clostridioides	0.322548	0	0	0	0.764818	0	0.112073	0.335366	0	0.478956	0.955964	0.111914	1.50917	0.823757	0	1.29539	0.570323	0.173204	0.193306	0.479152	0.254764	0.437704	0.214746	0.975114	0.296221	0.142523	0.426569	0.315361	0.212874	2.88383	0	0.201837	0.214395	0	0	0.326298	0.275566	0.152952	0	0.316391	0.193897	0.507151	0.173505	0.174091	0.387597	0.224811	0.23424	0.15289	0.214133
Coprococcus	0	0	0	0	0	0	0.173204	0.101626	0.233787	0.234383	0.284755	0	0	0.152548	0.254634	0.234598	0.274977	0.20377	0.274697	0.224284	0.264955	0.213762	0.194294	0.121889	0.132789	0.244325	0.172659	0.122075	0.1926	0.213241	0	0.232112	0.122511	0.152703	0	0.193739	0.204123	0	0	0.204123	0.255128	0	0.183711	0.15361	0.224398	0.204374	0.356452	0.234431	0.275314
Paraclostridium	0	0	0	0	0	0	0	0	0	0.17324	0	0	0	0.254246	0	0.183599	0	0	0.122088	0.17331	0	0.274837	0.143164	0.203149	0.214505	0	0.152346	0.264496	0	0	0	0	0.14293	0	0	0	0.112268	0	0	0.234742	0	0.324576	0.102062	0.122888	0.163199	0.112405	0.132396	0	0
Olsenella	0	0	0	0	0	0	0	0	0	0	0.111868	0	0	0	0.112039	0.122399	0.101843	0.163016	0.10174	0.132531	0.163049	0	0.10226	0	0	0.152703	0.132033	0	0.172326	0	0	0.181653	0.122511	0.213784	0	0.142755	0.142886	0	0	0.142886	0.193897	0	0.153092	0.122888	0.112199	0.173718	0	0.234431	0.163149
Lachnospira	0	0	0	0	0	0	0.101885	0	0.111811	0.152858	0.162717	0	0	0.183057	0.193522	0.142799	0	0.101885	0.264523	0.17331	0.224192	0.173046	0.15339	0	0	0.173063	0.233597	0	0.131779	0.111698	0	0.121102	0	0.122162	0	0.152952	0.142886	0.101968	0	0.183711	0.173487	0	0.163299	0.112647	0.203998	0.15328	0.224055	0.132504	0.193739
Lachnoanaerobaculum	0	0	0	0	0	0	0	0	0.121976	0	0.122038	0	0	0.142378	0.213893	0.122399	0.101843	0.101885	0.183132	0.152921	0.132477	0.101792	0.15339	0	0	0.152703	0.132033	0	0.101368	0.111698	0	0.141286	0	0.142523	0	0.152952	0.122474	0	0	0.173505	0.142872	0	0.13268	0	0.132599	0.132843	0.173134	0.183468	0.152952
Bifidobacterium	1.49179	0	0.261202	0	0.100634	0.74342	0.101885	0	0.142305	0.132477	0.162717	0	0	0.101698	0.162966	0.122399	0.132396	0.20377	0.132262	0.163115	0.17324	0	0.122712	0	0.102145	0.173063	0.101564	0.101729	0.202737	0.172624	0	0.201837	0.102093	0.223964	0.111993	0.152952	0.153092	0	0	0.173505	0.173487	0	0.193917	0.102407	0.152999	0.15328	0.122212	0.224238	0.214133
Absiella	0	0	0	0	0	0	0	0	0	0	0	0	0	0	0	0.173399	0	0	0	0	0.122287	0	0	0	0	0	0	0	0	0.355402	0	0	0	0	0	0	0	0	0	0	0.122461	0	0	0	0	0	0	0	0
Mesorhizobium	0	0	0	0	0	0	0	0	0	0	0	0	0	0	0	0	0	0	0	0	0	0	0	0	0	0	0	0	0.101368	0	0	0	0	0	0	0	0	0	0	0	0.102051	0	0	0	0	0	0	0.142697	0
Rhodothermus	0	0	0	0	0	0	0.122262	0	0	0	0	0	0	0.111868	0.234264	0	0	0	0	0.122337	0.122287	0	0	0.111732	0	0	0.14219	0	0	0	0	0	0	0.142523	0	0	0	0	0	0	0.102051	0	0	0	0	0	0	0.183468	0
Homo	0.856769	1.8344	0.170786	0.351759	0.382409	0.673096	0.366786	0.355691	0.254117	0.55029	0.366114	0.345915	0.405145	0.539001	1.22225	0.356997	1.21194	0.448293	0.264523	0.377205	0.560481	1.36401	0.327232	0.619604	0.623085	0.162883	0.304692	0.915565	0.182463	0.152315	0.122113	0.141286	1.26595	0.213784	0.285074	0.132558	0.275566	0.25492	0.641679	0.938967	0.428615	0.415864	0.438865	1.02407	0.244798	0.623339	0.763825	2.09968	0.632201
Desulfovibrio	0	0	0	0	0	0	0	0	0.101647	0	0.111868	0	0	0	0.101854	0.101999	0.122212	0.142639	0.10174	0.112142	0.17324	0	0	0	0	0.101802	0	0	0.141916	0	0	0.141286	0	0.162883	0	0.101968	0.122474	0	0	0.153092	0.153077	0	0.142886	0.102407	0.101999	0.122624	0	0.203853	0.142755
Herbinix	0	0	0	0	0	0	0.101885	0	0.203293	0.101906	0.223736	0	0	0.101698	0.173151	0.183599	0	0	0.15261	0.142726	0.152858	0.111971	0.173842	0.121889	0	0	0.192972	0	0.101368	0.223396	0	0.141286	0	0.111982	0	0.183542	0.13268	0	0	0.244948	0.173487	0	0.193917	0.122888	0.142799	0.163499	0.162949	0.224238	0.214133
Bacteroides	0	0	0	0	0	0	0	0	0.132141	0	0	0	0	0.101698	0.142595	0.101999	0.112028	0.13245	0.142436	0.122337	0.122287	0	0.10226	0	0	0.132342	0.25391	0	0.141916	0.132007	0	0.100918	0	0.111982	0	0	0	0	0	0.112268	0.173487	0	0.112268	0	0.112199	0.143062	0.152765	0.15289	0.163149
Anaerotignum	0	0	0	0	0	0	0	0	0.365928	0	0	0.10174	0	0	0.173151	0	0	0.101885	0.10174	0.112142	0	0	0.15339	0	0	0	0.101564	0	0	0	0	0.262388	0	0.142523	0.101812	0.112165	0.214329	0.112165	0.13241	0.234742	0.153077	0	0	0	0.112199	0.582465	0.173134	0.275201	0.152952
Longibaculum	0	0	0	0	0	0	0	0	0	0.142668	0	0	0	0	0	0	0	0	0	0	0	0	0	0	0	0	0	0	0	0.101543	0	0	0	0	0	0	0	0	0	0.153092	0	0	0	0	0.101999	0.194155	0.824931	0	0
Selenomonas	0	0	0	0	0	0	0	0	0	0	0.111868	0	0	0	0.101854	0.101999	0.112028	0.163016	0.122088	0.132531	0.142668	0	0.112486	0	0	0.152703	0	0	0.131779	0.111698	0	0.151378	0	0.152703	0	0.142755	0.112268	0	0	0.153092	0.153077	0	0.153092	0.112647	0.132599	0.15328	0.132396	0.173275	0.203936
Libanicoccus	0	0	0	0	0	0	0	0	0	0	0	0	0	0	0	0	0	0	0	0	0.132477	0	0	0	0	0	0	0	0.121642	0	0	0.121102	0	0.142523	0	0.101968	0.102062	0	0	0	0.112256	0	0.122474	0	0	0	0	0.203853	0.101968
Canis	0	0	0	0	0	0	0	0	0	0.112096	0	0	0	0.111868	0	0.132599	0	0.112073	0.142436	0.142726	0.152858	0.101792	0.15339	0	0.20429	0.122162	0	0	0.101368	0	0	0.11101	0.112302	0.101802	0	0.122362	0.163299	0	0.101854	0.13268	0.102051	0	0.142886	0.16385	0.163199	0.143062	0.112028	0	0
Ndongobacter	0	0	0	0	0	0	0	0	0	0	0.142378	0	0	0	0	0.101999	0.112028	0	0	0	0	0	0	0	0	0	0.121877	0	0	0	0	0	0	0	0	0	0	0	0	0	0	0	0	0	0	0	0	0	0
Erysipelatoclostridium	0	0	0	0	0	0	0.112073	0.264228	0.365928	0.580862	1.37293	0	1.24582	0.366114	0.285191	1.67279	0.763825	0.499236	0.406959	0.163115	0.346479	0.529316	0	7.3743	0.214505	0.173063	0.152346	0	0.314242	5.04671	0	0.151378	0	0	0.101812	0.183542	0.13268	0	0	0.13268	0.224513	0	0.163299	0.16385	0.163199	0.173718	0.254608	0.142697	0.22433
Acinetobacter	0	0	0	0	0	0	0	0	0	0	0	0	0	0	0	0	0	0	0	0.101947	0	0	0.112486	0	0	0	0.132033	0	0	0	0	0	0	0.223964	0	0	0	0	0	0	0	0	0	0.358423	0	0	0	0.101926	0
Anaerocolumna	0	0	0	0	0	0	0	0	0.162635	0.142668	0.122038	0	0	0.122038	0.173151	0.163199	0.101843	0.122262	0.20348	0.142726	0.18343	0.111971	0.184068	0	0	0.132342	0.284379	0	0.121642	0.132007	0	0.141286	0	0.101802	0	0.163149	0.13268	0	0	0.183711	0.183692	0	0.163299	0.133129	0.173399	0.143062	0.183318	0.173275	0.183542
Staphylococcus	0	0	0	0	0	0	0	0	0	0.142668	0.111868	0	0	0.183057	0.101854	0.183599	0.101843	0	0.111914	0.122337	0.101906	0.101792	0.122712	0	0.102145	0	0	0	0.101368	0.101543	0	0	0	0	0	0.122362	0.122474	0	0	0.224536	0.132667	0.142002	0.142886	0.15361	0.214198	0.204374	0.152765	0	0.112165
Oligotropha	0	0	0	0	0	0	0	0	0	0.152858	0	0	0	0.111868	0	0	0.101843	0.101885	0	0.122337	0.142668	0	0	0	0	0	0	0	0	0.142161	0	0.151378	0	0.234144	0	0	0	0	0	0	0	0	0	0.122888	0.101999	0.112405	0.162949	0.163082	0.152952
Agrobacterium	0	0	0	0	0	0	0	0	0	0	0	0	0	0	0	0	0	0	0	0	0	0	0	0	0	0	0	0	0	0	0	0	0	0	0	0	0	0	0	0	0.122461	0	0	0	0	0	0	0	0
Caproiciproducens	0	0	0.231063	0	0	0	0.122262	0	0	0.112096	0.111868	0	0	0	0.122224	0.112199	0.122212	0.13245	0.122088	0.152921	0.214002	0	0.10226	0.101574	0	0.132342	0	0	0.141916	0.101543	0	0.161469	0	0.203604	0.132356	0.112165	0.142886	0	0	0.193917	0.173487	0	0.173505	0.122888	0.132599	0.15328	0.112028	0.234431	0.214133
Dermabacter	0	0	0	0	0	0	0	0	0	0	0	0	0	0	0	0	0	0	0	0	0	0	0	0	0	0	0	0	0	0	0	0	0	0	0	0	0	0	0	0	0	0	0	0	0	0	0	0	0
Deinococcus	0	0	0	0	0	0	0	0	0	0	0	0	0	0	0	0	0	0	0	0	0	0	0	0	0	0	0	0	0	0	0	0	0	0	0	0	0	0	0	0	0	0	0	0	0	0	0	0.101926	0
Ethanoligenens	0	0	0	0	0	0	0.101885	0	0	0.112096	0.183057	0.122088	0.182315	0.101698	0.13241	0.132599	0.244424	0.224147	0.132262	0.132531	0.193621	0	0.10226	0.101574	0	0.101802	0	0	0.121642	0.132007	0	0.100918	0.102093	0.152703	0	0	0.122474	0	0	0.112268	0.153077	0	0.112268	0.102407	0	0.132843	0	0.163082	0.142755
Eubacterium	0	0	0	0	0	0	0.112073	0	0	0.152858	0.142378	0	0	0.152548	0.152781	0.122399	0.112028	0.193581	0.234001	0.214089	0.17324	0.12215	0.143164	0	0	0.183243	0.223441	0.111902	0.212874	0.142161	0	0.151378	0	0.142523	0	0.214133	0.153092	0	0	0.122474	0.163282	0	0.142886	0.133129	0.122399	0.194155	0.132396	0.163082	0.183542
Paeniclostridium	0	0	0	0	0	0	0	0	0	0.101906	0	0	0	0.193227	0	0.132599	0	0	0.10174	0.142726	0	0.2443	0.143164	0.162519	0.163432	0	0.426569	0.213632	0	0	0	0	0.153139	0	0	0	0.13268	0.112165	0	0.163299	0	0.30429	0.102062	0.102407	0.183599	0	0	0	0
Synechococcus	0	0	0	0	0	0	0	0	0	0	0	0	0	0	0	0	0	0	0	0	0	0	0	0	0	0	0	0	0	0	0	0	0	0	0	0	0	0	0	0	0	0	0	0	0	0	0	0.101926	0
Geobacter	0	0	0	0	0	0	0	0	0	0	0	0	0	0	0.122224	0	0	0.122262	0.122088	0	0.101906	0	0	0	0	0.122162	0	0	0.111505	0	0	0.100918	0	0.152703	0	0.101968	0	0	0	0.102062	0.112256	0	0.102062	0	0	0.102187	0	0.163082	0.112165
Collinsella	0	0	0	0	0	0	0.101885	0	0.101647	0.112096	0	0	0	0	0.13241	0.101999	0.142581	0.193581	0.132262	0.142726	0.163049	0	0.132938	0	0	0.142523	0	0.101729	0.131779	0	0	0.191745	0.122511	0.213784	0	0.142755	0.183711	0	0.112039	0.142886	0.163282	0	0.173505	0.102407	0.142799	0.163499	0	0.305779	0.183542
Chryseobacterium	0	0	0	0	0	0	0	0	0	0.122287	0	0	0	0	0.101854	0.101999	0.122212	0	0.10174	0.122337	0.112096	0	0.112486	0	0.102145	0.122162	0.132033	0	0.121642	0	0	0.131194	0	0	0	0	0	0	0	0.112268	0.122461	0	0	0	0.112199	0	0.101843	0	0.101968
Danio	0	0	0	0	0	0	0	0	0	0.101906	0.111868	0.600265	3.17026	0.132208	0.101854	0.132599	0.152765	0.621498	0.284871	0.142726	0	0.111971	0.173842	0	0.11236	0.203604	1.03595	0	0	1.01544	0	0	0.224604	0	0.458155	0	0	0	0	0	0	0	0.112268	0	0	0.183936	0.397189	0	0.214133
Adlercreutzia	0	0	0	0	0	0	0	0	0	0	0	0	0	0	0	0	0	0	0	0	0	0	0	0	0	0	0	0	0.121642	0	0	0	0	0	0	0	0	0	0	0	0	0	0	0	0	0	0	0.132504	0
Mycolicibacterium	0	0	0	0	0	0	0	0	0	0	0	0	0	0	0	0	0	0	0	0	0	0	0	0	0	0	0	0	0	0	0	0	0	0	0	0	0	0	0	0	0.102051	0	0	0	0.101999	0	0	0.122312	0.112165
Aeromonas	0	0	0	0	0	0	0	0	0	0	0	0	0	0	0	0	0	0	0	0	0	0	0	0	0	0	0.101564	0	0	0	0	0	0	0.122162	0	0	0	0	0	0	0	0	0	0	0	0	0	0.112119	0
Pseudobutyrivibrio	0	0	0	0	0	0	0	0	0	0	0	0	0	0	0.112039	0	0	0	0.111914	0	0	0	0	0	0	0.101802	0.101564	0	0	0	0	0	0	0	0	0	0	0	0	0	0	0	0	0	0	0	0.112028	0	0
Arthrobacter	0	0	0	0	0	0	0	0	0	0	0	0	0	0	0	0	0	0	0	0	0	0	0	0	0	0	0	0	0.111505	0	0	0	0	0	0	0	0	0	0	0	0	0	0	0	0	0	0	0	0
Sphingomonas	0	0	0	0	0	0	0	0	0	0	0	0	0	0	0	0	0	0	0	0	0	0	0	0	0	0	0	0	0	0	0	0	0	0	0	0	0	0	0	0	0	0	0	0	0	0	0	0	0
Pelobacter	0	0	0	0	0	0	0	0	0	0	0	0	0	0	0	0	0	0	0	0	0	0	0	0	0	0	0	0	0	0	0	0	0	0	0	0	0	0	0	0	0	0	0	0	0	0	0	0	0
Desulfitobacterium	0	0	0	0	0	0	0	0	0	0	0	0	0	0	0	0	0	0	0	0	0.101906	0	0	0	0	0	0	0	0	0	0	0	0	0	0	0	0	0	0	0	0	0	0.112268	0	0.101999	0	0	0	0.173346
Gordonibacter	0	0	0	0	0	0	0	0	0.121976	0.214002	0.183057	0	0	0.142378	0.315747	0	0.162949	0.285278	0.183132	0.203894	0.18343	0.193404	0.143164	0.132047	0.153218	0.468289	0.172659	0.132248	0.152053	0	0	0.141286	0	0.193424	0	0.183542	0.112268	0	0.101854	0.102062	0.122461	0	0.244948	0.16385	0.152999	0.15328	0.295346	0.234431	0.203936
Proteus	0	0	0	0	0	0	0	0	0	0	0.152548	0	0.263344	0	0	0.142799	0.356452	0	0.10174	0	0	0	0	0.162519	0	0	0	0	0	0.548335	0	0	0	0	0	0	0	0	0	0	0	0	0	0	0	0	0	0	0
Other	2.0764	0.571371	0.914205	1.31658	1.429	1.10508	10.0051	7.71341	10.0732	10.588	11.2885	7.7017	6.55323	10.3834	11.2447	11.4341	11.712	12.6439	12.4529	13.0594	13.9305	8.60139	12.3939	8.91823	10.7865	12.5115	10.5424	9.33876	13.0259	10.1442	7.35728	12.746	10.4952	12.5827	9.06129	12.8582	13.4925	8.24921	9.49277	14.8194	14.8382	6.65382	14.5336	12.1761	13.6271	15.0215	11.4879	14.973	14.2245
Larimichthys	0	0	0	0	0	0	0	0	0	0	0	0	0	0	0	0	0	0	0	0	0	0	0	0	0	0	0	0	0	0	0	0	0	0	0	0	0	0	0.122224	0	0	0	0	0.102407	0	0	0.112028	0	0
Mus	0	0	0	0	0	0	0	0	0	0.132477	0.152548	0.345915	1.72187	0.101698	0	0.173399	0.142581	0.315843	0.20348	0.122337	0.122287	0.111971	0.143164	0.101574	0.194076	0.162883	0.101564	0	0	2.02072	0	0	0.234814	0.111982	0.559967	0.112165	0.122474	0	0.101854	0.112268	0	0	0.183711	0.16385	0.152999	0.194155	0.631429	0	0.173346
Pseudoflavonifractor	0	0	0	0	0	0	2.71014	0	0	0	3.51876	1.74992	0	0	0	0	0	5.55272	0	0	0	0	0	0	0	4.29604	0	0	4.41967	0	1.66887	0	2.26646	4.24514	1.99552	2.8653	0	1.48873	0	0	4.02082	0	0	0	0	0	0	0	0
Theobroma	0	0	0	0	0	0	0	0	0	0	0	0	0	0	0	0	0	0	0	0	0	0	0	0	0	0	0	0	0	0	0	0	0	0	0	0	0	0	0	0	0	0	0	0	0	0	0	0	0
Lactococcus	0	0	0	0	0.130824	0.150693	0.101885	0	0	0	0	0.457829	0	0.162717	0	0	0	0	0	0	0	0	0.10226	0	0.20429	0	0	0	0	0	0.10176	0.100918	0.132721	0.111982	0	0	0.153092	0.152952	0	0	0	0.517294	0.26536	0.30722	0	0.102187	0	0	0
Buchnera	0	0	0	0	0	0	0	0	0	0	0	0	0	0	0	0.316198	0	0	0	0.112142	0	0	0	0	0	0	0	0	0	0	0	0	0	0	0	0	0	0	0	0.122474	0	0	0	0.143369	0.183599	0	0	0	0
Alistipes	0	0	0	0	0	0	0	0	0	0	0	0	0	0	0	0	0	0	0	0	0	0	0	0	0	0	0	0	0	0	0	0	0	0	0	0	0	0	0	0	0	0	0	0	0	0	0	0	0
Ulva	0	0	0	0	0	0	0	0	0	0	0	0	0	0	0	0	0	0	0	0	0	0	0	0	0	0	0	0	0	0	0	0	0	0	0	0	0	0	0	0	0	0	0	0	0	0	0	0	0
Saccharomyces	0	0	0	0	0	0	0	0	0	0	0	0	0	0	0	0	0	0	0	0	0	0	0	0	0	0	0.101564	0	0	0	0	0	0.132721	0	0	0	0	0	0	0	0	0	0	0	0	0	0	0	0
Plasmodium	0	0	0	0	0	0	0	0	0	0.458575	0	0	0	1.06783	0	0	0	0	0.15261	0.132531	0.234383	0.132329	0.143164	0	0.255363	0	0	0	0	0	0	0	0.224604	0	0	0.163149	0.13268	0	0	0.102062	0	0.10143	0.13268	0.143369	0.254998	0.132843	0	0	0
Candidatus_Arthromitus	0	0	0	0	0	0	0	0	0	0.152858	0	0	0	0.213567	0.112039	0	0	0	0.213653	0	0.17324	0	0.378362	0	0.143003	0.101802	0	0.132248	0	0	0	0	0.112302	0	0	0	0	0	0	0	0	0	0	0	0	0	0	0	0
Listeria	0	0	0	0	0	0	0	0	0	0	0	0.172958	0	0	0	0	0	0	0	0	0	0	0	0	0	0	0	0	0	0	0	0	0	0	0	0	0.122474	0	0	0	0	0.243432	0	0.133129	0	0	0	0	0
Cyprinus	0	0	0	0	0	0	0	0	0	0	0	0	0	0	0	0	0	0	0	0	0.101906	0	0	0	0.163432	0	0	0	0	0	0	0	0	0	0	0	0.122474	0	0	0	0	0	0	0.102407	0.122399	0.102187	0	0	0
Cicer	0	0	0	0	0	0	0	0	0	0	0	0	0	0	0	0	0	0	0	0	0	0	0	0	0	0	0	0	0	0	0	0	0	0	0	0	0	0	0	0	0	0	0	0	0	0	0	0	0
Sphaeramia	0	0	0	0	0	0	0	0	0	0	0	0	0	0	0	0	0	0	0	0	0	0	0	0	0.132789	0	0	0	0	0	0	0	0	0	0	0	0.102062	0	0	0	0	0	0	0	0	0.112405	0.122212	0	0
Coregonus	0	0	0	0	0	0	0	0	0	0	0	0	0	0	0	0	0.101843	0	0	0.122337	0.101906	0	0.10226	0.121889	0.143003	0.101802	0	0	0	0	0	0	0	0	0	0	0.112268	0	0	0	0	0	0	0.122888	0.101999	0.102187	0	0	0
Oryzias	0	0	0	0	0	0	0	0	0	0	0	0	0	0	0	0	0	0	0	0	0	0	0	0	0.122574	0	0	0	0	0	0	0	0	0	0	0	0	0	0	0	0	0	0	0.112647	0	0	0	0	0
Solanum	0	0	0	0	0	0	0	0	0	0	0	0	0	0	0	0	0	0	0	0	0	0	0	0	0.11236	0	0	0	0	0	0	0	0	0	0	0	0	0	0	0	0	0	0	0	0	0	0	0	0
Vagococcus	0	0	0	0	0	0	0	0	0	0	0	0	0	0	0	0	0	0	0	0	0	0	0	0	0	0	0	0	0	0	0	0	0	0	0	0	0	0	0	0	0	0.121716	0	0	0	0	0	0	0
Gossypium	0	0	0	0	0	0	0	0.101626	0	0.214002	0	0	0.192444	0.122038	0	0	0.193502	0	0	0.224284	0	0	0.194294	0.243779	0.183861	0.478469	0	0	0.212874	0.111698	0	0	0	0.111982	0.193443	0	0	0	0	0	0.102051	0	0	0.133129	0	0.102187	0	0	0
Brevibacillus	0	0	0	0	0	0	0	0	0	0	0	0	0	0	0.101854	0	0	0	0	0	0	0	0	0	0	0	0	0	0.121642	0	0	0	0	0	0	0	0	0	0	0.142886	0.112256	0	0	0	0.122399	0.122624	0	0.112119	0
Eggerthella	0.151194	0	0	0	0.110697	0	0	0	0.264281	0.163049	0.152548	0	0.131672	0	0.142595	0	0.336083	0.213958	0.213653	0.234479	0.152858	0.152687	0	0.142204	0	0.346126	0	0.162767	0.3852	0.203087	0	0	0	0.122162	0	0	0	0	0	0	0	0	0	0	0	0.102187	0.112028	0.15289	0.122362
Salmonella	0	0	0	0	0	0	0	0	0	0.132477	0	0	0	0	0	0	0	0.122262	0.15261	0	0.101906	0.111971	0	0	0	0.254505	0	0	0.141916	0	0	0	0	0.111982	0	0	0	0	0	0	0	0	0	0	0.152999	0	0.23424	0	0
Apis	0	0	0	0	0	0	0	0	0	0	0	0	0	0	0	0	0	0	0.122088	0	0	0	0	0	0	0	1.16799	0	0	0	0	0	0	0	0	0	0	0	0	0	0	0	0	0	0	0	0	0	0
Pecten	0	0	0	0	0	0	0	0	0	0.315907	0	0	0.121544	0.874606	0	0	0	0.295466	0.111914	0.458762	0	0	0.173842	0	0	0	0	0	0	0	0	0.100918	0	0.254505	0	0.397675	0	0	0	0	0.142872	0	0	0.389145	0	0.500715	0	0	0
Intestinibaculum	0	0	0	0	0	0	0	0	0	0.101906	0	0	0	0.203397	0	0	0	0	0.10174	0	0	0	0	0	0	0	0	0	0	0	0	0	0	0	0	0	0	0	0	0.13268	0	0	0	0	0	0.521153	0.101843	0	0
Carassius	0	0	0	0	0	0	0	0	0	0.132477	0	0	0	0	0	0	0	0	0	0	0	0	0	0	0	0	0	0	0.618348	0	0	0	0	0.254505	0.173081	0	0	0	0	0	0	0	0	0	0	0	0	0	0
Levivirus	0.312469	0	0	0	0.120761	0	0	0	0	0	0	0	0	0	0	0	0	0	0	0.122337	0	0	0	0	0	0.111982	0	0	0	0	0	0	0	0	0	0	0	0	0	0	0	0	0	0	0	0.112405	0.162949	0.112119	0.305904
Helicobacter	0	0	0	0	0	0	0	0	0	0.142668	0	0	0.283602	0	0	0	0.122212	0	0	0.1937	0	0	0.122712	0.162519	0	0.111982	0	0	0	0.111698	0	0	0	0	0.203625	0	0	0	0	0	0	0	0	0	0	0	0	0	0
Klebsiella	0	0	0	0	0	0	0	0	0	0	0	0	0	0	0.122224	0	0	0	0	0	0	0	0	0	0	0	0	0	0.141916	0	0	0.100918	0	0.122162	0	0	0	0	0	0.102062	0	0	0	0	0	0	0	0.163082	0
Parolsenella	0	0	0	0	0	0	0	0	0	0	0	0	0	0	0	0	0	0	0	0	0	0	0	0	0	0	0	0	0	0	0	0	0.112302	0	0	0	0	0	0	0	0	0	0	0	0	0	0	0	0
Microbacterium	0	0	0	0	0	0	0	0	0	0	0.111868	0	0	0	0	0	0	0.122262	0	0	0.122287	0	0	0	0	0	0	0	0.101368	0	0	0.11101	0	0.101802	0	0	0	0	0	0.13268	0	0	0	0	0	0.122624	0	0	0
Arabia	0	0	0	0	0	0	0	0	0	0	0	0	0	0	0	0	0	0	0	0	0	0.101792	0	0	0	0	0	0	0	0	0	0	0	0	0	0	0	0	0	0	0	0	0	0	0	0	0	0	0
Limnoglobus	0	0	0	0	0	0	0	0	0	0	0	0	0	0	0	0	0	0	0	0	0	0	0	0	0	0	0	0	0	0	0	0	0	0	0	0	0	0	0	0	0	0	0	0	0	0	0	0	0
Saccharomonospora	0	0	0	0	0	0	0	0	0	0	0	0	0	0	0	0.214198	0	0	0	0	0	0	0	0	0	0	0	0	0	0	0	0	0	0	0	0	0	0	0	0	0	0	0	0	0	0	0	0	0
Rhizobium	0	0	0	0	0	0	0	0	0	0	0	0	0	0	0	0	0	0.101885	0	0	0.101906	0	0	0	0	0	0	0	0.101368	0	0	0	0	0	0	0	0	0	0	0	0	0	0	0	0	0	0	0.101926	0.101968
Cutibacterium	0	0	0	0	0	0	0	0	0	0	0	0	0	0	0	0	0	0	0	0	0	0	0	0	0	0	0	0	0	0	0	0	0	0	0	0	0	0	0	0	0	0	0	0	0	0	0	0	0
Faecalitalea	0	0	0	0	0	0	0	0	0	0.244574	0.172887	0	0	0.132208	0.101854	0	0	0.152827	0	0	0	0	0	0.121889	0	0	0	0	0	0	0	0	0	0	0	0.112165	0	0	0	0	0.142872	0	0	0	0	0.132843	0.101843	0.163082	0.132558
Avastrovirus	0.100796	0	0	0	0	0	0	0.243902	0.731856	0.132477	0.152548	0.223827	0.182315	0.183057	0.376859	0.183599	1.27304	1.03923	0	0.17331	0.275145	1.42508	0	0.162519	1.21553	3.37982	0	0	0	0.213241	0	0	0	0	0	0	0	0	0	0	0	0	0	0	0	0	0	0	0
Candidatus_Phytoplasma	0	0	0	0	0	0	0	0	0	0.122287	0	0	0	0	0	0	0	0	0	0	0.122287	0	0	0	0	0	0	0	0	0	0	0	0	0	0	0	0	0	0	0	0	0	0	0	0	0.122624	0	0	0
Erysipelothrix	0	0	0	0	0	0	0	0	0	0	0	0	0	0	0	0	0	0	0	0	0	0	0	0.111732	0	0	0	0	0	0	0	0	0	0	0	0	0	0	0	0	0	0	0.102062	0	0	0	0.122212	0	0.122362
Tyzzerella	0	0	0	0	0	0	0	0	0	0	0	0	0	0	0	0	0	0	0	0	0	0	0	0	0	0.183243	0	0	0	0	0	0	0	0	0	0	0	0	0	0	0	0	0	0	0	0	0	0	0
Treponema	0	0	0	0	0	0	0	0	0	0	0	0	0	0	0	0	0	0	0	0	0	0	0	0	0	0	0	0	0	0	0	0.11101	0	0	0	0	0	0	0	0	0	0	0.102062	0	0	0	0	0.122312	0.101968
Limnochorda	0	0	0	0	0	0	0	0	0	0	0	0	0	0	0	0	0	0	0	0	0	0	0	0	0	0	0	0	0	0	0	0	0	0	0	0	0	0	0	0	0	0	0	0	0	0	0	0	0
Aminipila	0	0	0	0	0	0	0	0	0	0	0	0	0	0	0	0	0	0	0	0	0	0	0	0	0	0	0	0	0	0	0	0	0	0	0	0	0	0	0	0	0	0	0	0	0	0	0	0.112119	0
Hungateiclostridium	0	0	0	0	0	0	0	0	0	0	0	0	0	0	0	0	0	0	0	0	0	0	0	0	0	0	0	0	0	0	0	0	0	0	0	0	0	0	0	0	0	0	0	0	0	0	0	0.101926	0
Prevotella	0	0	0	0	0	0	0	0	0.172799	0	0.122038	0	0	0	0	0	0	0	0	0.101947	0	0	0	0	0	0	0	0	0	0.203087	0	0	0	0.111982	0	0	0	0	0	0.102062	0	0	0	0	0	0.102187	0.132396	0.101926	0.193739
Faecalibaculum	0	0	0	0	0	0	0	0	0	0	0	0	0	0	0.122224	0	0	0.122262	0	0	0	0	0.112486	0	0	0	0	0	0	0	0	0	0	0	0	0	0	0	0	0.295979	0	0	0	0	0.183599	0	0	0	0.101968
Hydrogenophilus	0	0	0	0	0	0	0	0	0	0	0	0	0	0	0	0	0	3.02598	0	0	0	0	2.60763	0	0	2.75883	0	1.41404	0	0	0	0	0.102093	0	0	2.35546	0	0	0	0	3.42892	0	0	0	3.09058	0	0	0	3.69124
Cupriavidus	0	0	0	0	0	0	0	0	0	0	0.101698	0	0	0	0	0	0	0	0	0	0	0	0	0	0	0.142523	0	0	0	0.142161	0	0	0	0	0	0	0	0	0	0	0	0	0	0	0	0	0	0	0
Phlebia	0	0	0	0	0	0	0	0	0	0	0	0	0	0	0	0	0	0	0	0	0	0	0	0	0	0.111982	0	0	0	0	0	0	0	0	0	0	0	0	0	0	0	0	0	0	0	0	0	0	0
Felis	0	0	0	0	0	0	0	0	0	0	0	0	0	0	0	0	0	0	0	0	0	0	0	0	0	0.111982	0	0	0	0	0	0	0	0	0	0	0	0	0	0	0	0	0	0	0	0	0	0	0
Xenopus	0	0	0	0	0	0	0	0	0	0	0	0	0	0	0	0	0.203687	0	0	0	0	0.132329	0	0	0	0	0	0	0	0	0	0	0	0	0	0	0	0	0	0	0	0	0	0	0	0	0	0	0
Phasianus	0.100796	0.120289	0	0	0.221395	0	0	0	0	0	0	0	0	0	0	0	0	0	0	0	0	0	0	0	0	0	0	0	0.243284	0	0	0	0	0	0	0	0	0	0	0	0	0	0	0	0	0	0	0	0
Coturnix	0	0	0	0	0.130824	0	0	0	0	0	0	0	0	0	0	0	0	0	0	0	0	0	0	0	0	0	0	0	0.121642	0	0	0	0	0	0	0	0	0	0	0	0	0	0	0	0	0	0	0	0
Meleagris	0	0	0	0	0.120761	0	0	0	0	0	0	0	0	0	0	0	0	0	0	0	0	0	0	0	0	0	0	0	0	0	0	0	0	0	0	0	0	0	0	0	0	0	0	0	0	0	0	0	0
Shigella	0	0	0	0	0.100634	0	0	0	0	0	0.101698	0	0	0	0	0	0	0	0	0	0	0	0	0	0	0	0	0	0	0	0	0	0	0	0	0	0	0	0	0	0	0	0	0	0	0	0	0	0
Bipolaris	0	0	0	0	0	0	0	0	0	0	0	0	0	0	0	0	0	0	0	0	0	0	0	0	0	0	0	0	0	0	0	0	0	0.101802	0	0	0	0	0	0	0	0	0.142886	0	0	0	0	0.101926	0.132558
Enterobacter	0	0	0	0	0	0	0	0	0	0	0	0	0	0	0	0	0	0	0	0.112142	0	0	0	0	0	0	0	0	0	0	0	0	0	0	0	0	0	0	0	0	0	0	0	0	0	0	0	0.122312	0
Spiroplasma	0	0	0	0	0	0	0	0	0	0	0	0	0	0	0	0	0	0	0	0	0	0	0	0	0	0	0	0	0	0	0	0	0	0	0	0	0	0	0	0.13268	0	0	0	0	0.152999	0	0	0	0
Geotrypetes	0	0	0	0	0	0	0	0	0	0	0	0	0	0	0	0	0	0	0	0	0	0	0	0	0	0	0	0	0	0	0	0	0	0	0	0	0	0	0	0	0	0	0	0	0.142799	0	0	0	0
Mycoplasma	0	0	0	0	0	0	0	0	0	0.132477	0.101698	0	0	0	0	0.112199	0	0	0	0	0	0	0	0	0	0	0	0	0	0	0	0	0	0	0	0	0	0	0	0.13268	0	0	0	0	0.112199	0.163499	0	0	0
Thermoanaerobacterium	0	0	0	0	0	0	0	0	0	0.193621	0	0	0	0	0	0	0	0	0	0	0	0	0	0	0	0	0	0	0	0	0	0	0	0	0	0	0	0	0	0	0	0	0	0	0.101999	0	0.112028	0	0
Terrisporobacter	0.28223	0	0	0	0	0	0	0	0	0	0	0	0	0	0	0	0	0	0	0	0	0	0	0	0	0	0	2.17701	0	0	0	0	0	0	0	0	0	0	0	0	0	0	0	0	0	0	0	0	0
Megasphaera	0	0	0	0	0	0	0	0	0	0	0	0	0	0	0	0	0	0	0	0	0.132477	0	0	0	0	0	0	0	0.16219	0	0	0	0	0	0	0	0	0	0	0	0.112256	0	0	0	0	0	0	0	0
Blastocystis	0	0	0	0	0	0	0	0.101626	0	0	0	0	0	0.111868	0	0	0	0	0	0	0	0	0	0.172676	0	0	0.152346	0	0	0	0	0	0	0	0	0	0	0	0	0	0	0	0	0.16385	0	0	0	0	0
Methanosarcina	0	0	0	0	0	0	0	0	0	0	0	0	0	0	0	0	0	0	0	0	0	0	0	0	0	0	0	0	0	0	0	0.161469	0	0	0	0	0	0	0	0	0	0	0	0	0	0	0	0	0
Francisella	0	0	0	0	0	0	0	0	0	0	0	0	0	0	0	0	0	0	0	0	0	0	0	0	0	0	0	0	0	0	0	0.11101	0	0	0	0	0	0	0	0	0	0	0	0	0	0	0	0	0
Methanomassiliicoccus	0	0	0	0	0	0	0	0	0	0	0	0	0	0	0	0	0	0	0	0	0	0	0	0	0	0	0	0	0	0	0	0	0	0	0	0	0	0	0	0	0	0	0	0	0	0	0	0	0
Akkermansia	0	0	0	0	0	0	0	0	0	0	0	0	0	0	0	0	0	0	0	0	0	0	0	0	0	0	0	0	0	0	0	0	0	0	0	0	0	0	0	0	0	0	0	0	0	0	0	0	0
Kiritimatiella	0	0	0	0	0	0	0	0	0	0	0	0	0	0	0	0	0	0	0	0	0	0	0	0	0	0	0	0	0	0	0	0	0	0	0	0	0	0	0	0	0	0	0	0	0	0	0	0	0
Chanos	0	0	0	0	0	0	0	0	0	0	0	0	0	0	0	0	0	0	0	0	0	0	0	0	0	0	0	0	0	0	0	0	0	0	0	0	0	0	0	0	0	0	0	0	0	0	0	0	0
Fusarium	0	0	0	0	0	0	0	0	0	0	0	0	0	0	0	0	0	0	0	0	0	0	0	0	0	0	0	0	0	0	0	0	0	0	0	0	0	0	0	0	0	0	0	0	0	0	0	0	0
Cellulosilyticum	0	0	0	0	0	0	0	0	0	0.448385	0.132208	0	0	0	0	0	0.509217	0.173204	0	0	0	0	0	0	0	0	0	0	0	0	0	0	0	0	0	0	0	0	0	0	0	0	0	0	0	0	0	0	0
Vigna	0	0	0	0	0	0	0	0	0	0	0	0	0	0	0	0	0	0	0	0	0	0	0	0	0.11236	0	0	0	0	0	0	0	0	0	0	0	0	0	0	0	0	0	0	0	0	0	0	0	0
Mucinivorans	0	0	0	0	0	0	0	0	0	0	0	0	0	0	0	0	0	0	0	0	0	0	0	0	0	0	0	0	0	0	0	0	0	0	0	0	0	0	0	0	0	0	0	0	0	0	0	0	0
Shewanella	0	0	0	0	0	0	0	0	0	0	0	0	0	0	0	0	0	0	0	0	0	0	0	0	0	0	0	0	0	0	0	0	0	0	0	0	0	0	0	0	0	0	0	0	0	0	0	0.101926	0
Xanthomonas	0	0	0	0	0	0	0	0	0	0	0	0	0	0	0	0	0	0	0	0	0	0	0	0	0	0	0	0	0	0	0	0	0	0	0	0	0	0	0	0	0	0	0	0	0	0	0	0	0
Syntrophococcus	0	0	0	0	0	0	0	0	0	0	0	0	0	0	0	0	0	0	0	0	0	0	0	0	0	0	0	0	0	0	0	0	0	0	0	0	0	0	0	0	0	0	0	0	0	0	0	0	0.122362
Desulfotomaculum	0	0	0	0	0	0	0	0	0.101647	0	0	0	0	0	0	0	0	0	0	0	0	0	0	0	0	0	0	0	0	0	0	0	0	0	0	0	0	0	0	0	0	0	0	0	0	0	0	0	0.122362
Ezakiella	0	0	0	0	0	0	0	0	0.111811	0	0	0	0	0	0	0	0	0	0	0	0	0	0	0	0	0	0	0	0	0.203087	0	0	0	0	0	0	0	0	0	0	0	0	0	0	0	0	0	0	0
Gammacoronavirus	0	0	0	0	0	0	0.305655	0	0	0	0	0	0	0	0	0	0	0	0	0	0	0	0	0	0	0	0	0	0	0	0	0	0	0	0	0	0	0	0	0	0	0	0	0	0	0	0	0	0
Vequintavirus	0	0	0	0	0	0	0	0	0	0	0	0	0	0	0	0	0	0.193581	0	0	0	0	0	0	0	0	0	0	0	0.132007	0	0	0	0	0	0	0	0	0	0	0	0	0	0	0	0	0	0	0
Alternaria	0	0	0	0	0	0	0	0	0	0	0	0	0.111415	0	0	0	0	0	0	0	0	0	0	0	0	0	0	0	0	0	0	0	0	0	0	0	0	0	0	0	0	0	0	0	0	0	0	0	0
Anneissia	0	0	0	0	0	0	0	0	0	0	0	0	0.101286	0	0	0	0	0	0	0	0	0	0	0	0	0	0	0	0	0	0	0	0	0	0	0	0	0	0	0	0	0	0	0	0	0	0	0	0
Clavibacter	0	0	0	0	0	0	0	0	0	0	0	0	0	0	0	0	0	0	0	0	0	0	0	0	0	0	0	0	0	0	0	0	0	0	0	0	0	0	0	0	0	0	0	0	0	0	0	0	0
Sphingobium	0	0	0	0	0	0	0	0	0	0	0	0	0	0	0	0	0	0	0	0	0	0	0	0	0	0	0	0	0	0	0	0	0	0	0	0	0	0	0	0	0	0	0	0	0	0	0	0	0
Bradyrhizobium	0	0	0	0	0	0	0	0	0	0	0	0	0	0	0	0	0	0	0	0	0	0	0	0	0	0	0	0	0.101368	0	0	0	0	0	0	0	0	0	0	0	0	0	0	0	0	0	0	0	0
Herpetomonas	0	0	0	0	0	0	0	0	0	0	0	0	0	0	0	0	0	0	0	0	0	0	0	0	0	0	0	0	0	0	0	0	0	0	0	0	0	0	0	0	0	0	0	0	0	0	0	0	0
Actinomyces	0	0	0	0	0	0	0	0	0	0	0	0	0	0	0	0	0	0	0	0	0	0	0	0	0	0	0	0	0	0	0	0	0	0	0	0	0	0	0	0	0	0	0	0	0	0	0	0	0
Micromonospora	0	0	0	0	0	0	0	0	0	0	0	0	0	0	0	0	0	0	0	0	0	0	0	0	0	0	0	0	0	0	0	0	0	0	0	0	0	0	0	0	0	0	0	0	0	0	0	0	0
Nocardioides	0	0	0	0	0	0	0	0	0	0	0	0	0	0	0	0	0	0	0	0	0	0	0	0	0	0	0	0	0	0	0	0	0	0	0	0	0	0	0	0	0	0	0	0	0	0	0	0	0
Hymenobacter	0	0	0	0	0	0	0	0	0	0	0	0	0	0	0	0	0	0	0	0	0	0	0	0	0	0	0	0	0	0	0	0	0	0	0	0	0	0	0	0	0	0	0	0	0	0	0	0	0
Serratia	0	0	0	0	0	0	0	0	0	0	0	0	0	0	0	0	0	0	0	0	0	0	0	0	0	0	0	0	0	0	0	0	0	0	0	0	0	0	0	0	0	0	0	0	0	0	0	0	0
Halomonas	0	0	0	0	0	0	0	0	0	0	0	0	0	0	0	0	0	0	0	0	0	0	0	0	0	0	0	0	0	0	0	0	0	0	0	0	0	0	0	0	0	0	0	0	0	0	0	0	0
Muribaculum	0	0	0	0	0	0	0	0	0	0	0	0	0	0	0	0	0	0	0	0	0	0	0	0	0	0	0	0	0	0	0	0	0	0	0	0	0	0	0	0	0	0	0	0	0	0	0	0	0
Achromobacter	0	0	0	0	0	0	0	0	0	0	0	0	0	0	0	0	0	0	0	0	0	0	0	0	0	0	0	0	0	0	0	0	0	0	0	0	0	0	0	0	0	0	0	0	0	0	0	0	0
Alicyclobacillus	0	0	0	0	0	0	0	0	0	0	0	0	0	0	0	0	0	0	0	0	0	0	0	0	0	0	0	0	0	0	0	0	0	0	0	0	0	0	0	0	0	0	0	0	0	0	0	0	0
Lysobacter	0	0	0	0	0	0	0	0	0	0	0	0	0	0	0	0	0	0	0	0	0	0	0	0	0	0	0	0	0	0	0	0	0	0	0	0	0	0	0	0	0	0	0	0	0	0	0	0	0
Stenotrophomonas	0	0	0	0	0	0	0	0	0	0	0	0	0	0	0	0	0	0	0	0	0	0	0	0	0	0	0	0	0	0	0	0	0	0	0	0	0	0	0	0	0	0	0	0	0	0	0	0	0
Azospirillum	0	0	0	0	0	0	0	0	0	0	0	0	0	0	0	0	0	0	0	0	0	0	0	0	0	0	0	0	0	0	0	0	0	0	0	0	0	0	0	0	0	0	0	0	0	0	0	0	0
Burkholderia	0	0	0	0	0	0	0	0	0	0	0	0	0	0	0	0	0	0	0	0	0	0	0	0	0	0	0	0	0	0	0	0	0	0	0	0	0	0	0	0	0	0	0	0	0	0	0	0	0
Acetobacter	0	0	0	0	0	0	0	0	0	0	0	0	0	0	0	0	0	0	0	0	0	0	0	0	0	0	0	0	0	0	0	0	0	0	0	0	0	0	0	0	0	0	0	0	0	0	0	0	0
Sphingopyxis	0	0	0	0	0	0	0	0	0	0	0	0	0	0	0	0	0	0	0	0	0	0	0	0	0	0	0	0	0	0	0	0	0	0	0	0	0	0	0	0	0	0	0	0	0	0	0	0	0
Thermaerobacter	0	0	0	0	0	0	0	0	0	0	0	0	0	0	0	0	0	0	0	0	0	0	0	0	0	0	0	0	0	0	0	0	0	0	0	0	0	0	0	0	0	0	0	0	0	0	0	0	0
Acidovorax	0	0	0	0	0	0	0	0	0	0	0	0	0	0	0	0	0	0	0	0	0	0	0	0	0	0	0	0	0	0	0	0	0	0	0	0	0	0	0	0	0	0	0	0	0	0	0	0	0
Chromobacterium	0	0	0	0	0	0	0	0	0	0	0	0	0	0	0	0	0	0	0	0	0	0	0	0	0	0	0	0	0	0	0	0	0	0	0	0	0	0	0	0	0	0	0	0	0	0	0	0	0
Anaeromyxobacter	0	0	0	0	0	0	0	0	0	0	0	0	0	0	0	0	0	0	0	0	0	0	0	0	0	0	0	0	0.111505	0	0	0	0	0	0	0	0	0	0	0	0	0	0	0	0	0	0	0	0
Penicillium	0	0	0	0	0	0	0	0	0	0	0	0	0	0	0	0	0	0	0	0	0	0	0	0	0	0	0	0	0.101368	0	0	0	0	0	0	0	0	0	0	0	0	0	0	0	0	0	0.101843	0	0
Candidatus_Prometheoarchaeum	0	0	0	0	0	0	0	0	0	0	0	0	0	0	0	0	0	0	0	0	0	0	0	0	0	0	0	0	0	0	0	0	0	0	0	0	0	0	0	0	0	0	0	0	0	0.214592	0	0	0
Phytophthora	0	0	0	0	0	0	0	0	0	0	0	0	0	0	0	0	0	0	0	0	0	0	0	0	0	0	0	0	0	0	0	0	0	0	0	0	0	0	0	0	0	0	0	0	0	0.102187	0	0	0
Chlamydia	0	0	0	0	0	0	0	0	0	0	0	0	0	0	0	0	0	0	0	0	0	0	0	0	0	0	0	0	0	0	0	0	0	0	0	0	0	0	0	0	0	0	0	0	0	0	0	0	0
Anopheles	0	0	0	0	0	0	0	0	0	0	0	0	0	0	0	0	0	0	0	0	0	0	0	0	0	0	0	0	0	0	0	0	0	0	0	0	0	0	0	0	0	0	0	0	0	0	0	0	0
Candidatus_Desulforudis	0	0	0	0	0	0	0	0	0	0	0	0	0	0	0	0	0	0	0	0	0	0	0	0	0	0	0	0	0	0	0	0	0	0	0	0	0	0	0	0	0	0	0	0	0	0	0	0	0
Eriobotrya	0	0	0	0	0	0	0	0	0	0	0	0	0	0	0	0	0	0	0	0	0	0	0	0	0	0	0	0	0	0	0	0	0	0	0	0	0	0	0	0	0	0	0	0	0	0	0	0	0
Sinocharis	0	0	0	0	0	0	0	0	0	0	0	0	0	0	0	0	0	0	0	0	0	0	0	0	0	0	0	0	0	0	0	0	0	0	0	0	0	0	0	0	0	0	0	0	0	0	0	0	0
Methylacidiphilum	0	0	0	0	0	0	0	0	0	0	0	0	0	0	0	0	0	0	0	0	0	0	0	0	0	0	0	0	0	0	0	0	0	0	0	0	0	0	0	0	0	0	0	0	0	0	0	0	0
Pantoea	0	0	0	0	0	0	0	0	0	0	0	0	0	0	0	0	0	0	0	0	0	0	0	0	0	0	0	0	0	0	0	0	0	0	0	0	0	0	0	0	0	0	0	0	0	0	0	0	0
Chroomonas	0	0	0	0	0	0	0	0	0	0	0	0	0	0	0	0	0	0	0	0	0	0	0	0	0	0	0	0	0	0	0	0	0	0	0	0	0	0	0	0	0	0	0	0	0	0	0	0	0
Brevibacterium	0	0	0	0	0	0	0	0	0	0	0	0	0	0	0	0	0	0	0	0	0	0	0	0	0	0	0	0	0	0	0	0	0	0	0	0	0	0	0	0	0	0	0	0	0	0	0	0	0
Parastrongyloides	0	0	0	0	0	0	0	0	0	0	0	0	0	0	0	0	0	0	0	0	0	0	0	0	0	0	0.345318	0	0	0	0	0	0	0	0	0	0	0	0	0	0	0	0	0	0	0	0	0	0
Mesotoga	0	0	0	0	0	0	0	0	0	0	0	0	0	0	0	0	0	0	0	0	0	0	0	0	0	0	0.132033	0	0	0	0	0	0	0	0	0	0	0	0	0	0	0	0	0	0	0	0	0	0
Gouania	0	0	0	0	0	0	0	0	0	0.18343	0	0	0	0.213567	0	0	0	0	0	0	0.264955	0	0	0	0	0	0	0	0	0	0	0	0	0	0	0	0	0	0	0	0	0	0	0	0	0	0	0	0
Arcanobacterium	0	0	0	0	0	0	0	0	0	0	0	0	0	0	0	0	0	0	0	0	0	0	0	0	0	0	0	0	0	0	0	0	0	0	0	0	0	0	0	0	0	0	0	0	0	0	0	0	0
Morus	0	0	0	0	0	0	0	0	0	0	0	0	0	0	0	0	0	0	0	0	0	0	0	0	0	0	0	0	0	0	0	0	0	0	0	0	0	0	0	0	0	0	0	0	0	0	0	0	0
Dickeya	0	0	0	0	0	0	0	0	0	0	0	0	0	0	0	0	0	0	0	0	0	0	0	0	0	0	0	0	0	0	0	0	0	0	0	0	0	0	0	0	0	0	0	0	0	0	0	0	0
Microcystis	0	0	0	0	0	0	0	0	0	0	0	0	0	0	0	0	0	0	0	0	0	0	0	0	0	0	0	0	0	0	0	0	0	0	0	0	0	0	0	0	0	0	0	0	0	0	0	0	0
Syngnathus	0	0	0	0	0	0	0	0	0	0	0	0	0	0.274586	0	0	0	0	0	0	0	0	0	0	0	0	0	0	0	0	0	0	0	0	0	0	0	0	0	0	0	0	0	0	0	0	0	0	0
[truncated: 29 more columns]

## Sheet: TAXA_DEGS
Genes	Timepoint	Treatment	Comparison	LFC	padj	Regulation
Turicibacter	D14	PFA	CON	15.3364	6.53306e-13	Up
Turicibacter	D14	AGP	CON	17.3245	8.43003e-17	Up
Turicibacter	D14	AGP+PFA	CON	16.8598	1.36048e-15	Up
Streptococcus	D14	AGP+PFA	CON	-4.46085	0.00117887	Down
Pseudoflavonifractor	D14	AGP+PFA	CON	-20.5352	1.25232e-10	Down
Turicibacter	D14	AB	CON	14.5781	1.26549e-11	Up
Turicibacter	D14	AB+PFA	CON	14.9694	7.64045e-12	Up
Enterococcus	D21	AGP+PFA	CON	-3.39809	0.000949889	Down
Lactobacillus	D21	AGP+PFA	CON	-3.45298	0.00932328	Down
Pseudoflavonifractor	D21	AGP+PFA	CON	-22.2238	4.16352e-12	Down
Enterococcus	D21	AB	CON	-2.8849	0.00448	Down
Lactobacillus	D21	AB	CON	-3.25464	0.00719115	Down
Pseudoflavonifractor	D21	AB	CON	-22.7176	1.19212e-12	Down
Enterococcus	D21	AB+PFA	CON	-3.17991	0.00084097	Down
Lactobacillus	D21	AB+PFA	CON	-3.23361	0.0069715	Down
Pseudoflavonifractor	D21	AB+PFA	CON	-22.1139	5.48273e-12	Down
Escherichia	D35	AGP+PFA	CON	4.43376	6.53964e-06	Up
Turicibacter	D14	CON	PFA	-23.5076	3.44719e-30	Down
Streptococcus	D14	AGP	PFA	-4.37294	0.000897146	Down
Streptococcus	D14	AGP+PFA	PFA	-6.95556	5.60946e-08	Down
Pseudoflavonifractor	D14	AGP+PFA	PFA	-21.256	4.43164e-11	Down
Lactobacillus	D21	AGP+PFA	PFA	-3.83784	0.00389412	Down
Pseudoflavonifractor	D21	AGP+PFA	PFA	-21.9091	8.94314e-12	Down
Lactobacillus	D21	AB	PFA	-4.00809	0.00294746	Down
Pseudoflavonifractor	D21	AB	PFA	-22.4072	2.57256e-12	Down
Lactobacillus	D21	AB+PFA	PFA	-4.02164	0.00285412	Down
Pseudoflavonifractor	D21	AB+PFA	PFA	-21.804	1.15894e-11	Down
Lactobacillus	D35	AGP	PFA	-2.82887	0.0320907	Down
Escherichia	D35	AGP+PFA	PFA	4.51427	3.18009e-06	Up
Turicibacter	D14	CON	AGP	-21.3495	1.90398e-25	Down
Streptococcus	D14	PFA	AGP	4.39105	0.000897173	Up
Pseudoflavonifractor	D14	AGP+PFA	AGP	-21.1545	1.4834e-10	Down
Lactobacillus	D21	AGP+PFA	AGP	-1.9409	0.0344357	Down
Pseudoflavonifractor	D21	AGP+PFA	AGP	-20.4542	3.0297e-10	Down
Lactobacillus	D21	AB	AGP	-3.03159	0.0179558	Down
Streptococcus	D21	AB	AGP	-3.26959	0.0175048	Down
Pseudoflavonifractor	D21	AB	AGP	-20.7971	1.36137e-10	Down
Lactobacillus	D21	AB+PFA	AGP	-3.05252	0.0174238	Down
Streptococcus	D21	AB+PFA	AGP	-4.03499	0.00244834	Down
Pseudoflavonifractor	D21	AB+PFA	AGP	-20.3645	3.72423e-10	Down
Lactobacillus	D35	PFA	AGP	2.9718	0.0320897	Up
Escherichia	D35	AGP+PFA	AGP	2.65599	0.0124209	Up
Lactobacillus	D35	AB	AGP	4.61967	0.00149109	Up
Lactobacillus	D35	AB+PFA	AGP	2.88863	0.0310623	Up
Turicibacter	D14	CON	AGP+PFA	-18.2185	1.55644e-18	Down
Streptococcus	D14	CON	AGP+PFA	4.65613	0.00117911	Up
Pseudoflavonifractor	D14	CON	AGP+PFA	17.0518	2.42811e-07	Up
Streptococcus	D14	PFA	AGP+PFA	7.22004	5.60986e-08	Up
Pseudoflavonifractor	D14	PFA	AGP+PFA	17.1631	5.60986e-08	Up
Pseudoflavonifractor	D14	AGP	AGP+PFA	17.5059	1.70891e-07	Up
Streptococcus	D14	AB	AGP+PFA	5.45736	0.000155898	Up
Pseudoflavonifractor	D14	AB	AGP+PFA	17.0067	4.00333e-07	Up
Pseudoflavonifractor	D14	AB+PFA	AGP+PFA	17.3035	3.65981e-07	Up
Enterococcus	D21	CON	AGP+PFA	3.30987	0.000949852	Up
Lactobacillus	D21	CON	AGP+PFA	3.3085	0.0093238	Up
Pseudoflavonifractor	D21	CON	AGP+PFA	18.6252	1.7025e-08	Up
Lactobacillus	D21	PFA	AGP+PFA	3.99434	0.00389429	Up
Pseudoflavonifractor	D21	PFA	AGP+PFA	18.5157	2.09007e-08	Up
Lactobacillus	D21	AGP	AGP+PFA	1.99308	0.0344379	Up
Pseudoflavonifractor	D21	AGP	AGP+PFA	16.9837	4.79444e-07	Up
Escherichia	D35	CON	AGP+PFA	-4.43368	6.54089e-06	Down
Escherichia	D35	PFA	AGP+PFA	-4.58112	3.1807e-06	Down
Escherichia	D35	AGP	AGP+PFA	-2.656	0.0124232	Down
Turicibacter	D14	CON	AB	-15.4866	4.07156e-13	Down
Streptococcus	D14	AGP+PFA	AB	-5.33137	0.00015587	Down
Pseudoflavonifractor	D14	AGP+PFA	AB	-20.3993	3.37748e-10	Down
Enterococcus	D21	CON	AB	2.82917	0.0044798	Up
Lactobacillus	D21	CON	AB	3.19813	0.00719159	Up
Pseudoflavonifractor	D21	CON	AB	18.8057	1.16127e-08	Up
Lactobacillus	D21	PFA	AB	4.16068	0.00294761	Up
Pseudoflavonifractor	D21	PFA	AB	18.6918	1.42791e-08	Up
Lactobacillus	D21	AGP	AB	3.14668	0.0179571	Up
Streptococcus	D21	AGP	AB	3.40459	0.0175043	Up
Pseudoflavonifractor	D21	AGP	AB	17.1327	3.36838e-07	Up
Lactobacillus	D35	AGP	AB	-4.48956	0.00149121	Down
Turicibacter	D14	CON	AB+PFA	-18.2363	5.7501e-18	Down
Enterococcus	D21	CON	AB+PFA	3.22108	0.000840937	Up
Lactobacillus	D21	CON	AB+PFA	3.32733	0.00697193	Up
Pseudoflavonifractor	D21	CON	AB+PFA	18.6245	1.70388e-08	Up
Lactobacillus	D21	PFA	AB+PFA	3.88739	0.00285425	Up
Pseudoflavonifractor	D21	PFA	AB+PFA	18.5215	2.0915e-08	Up
Lactobacillus	D21	AGP	AB+PFA	3.17207	0.017425	Up
Streptococcus	D21	AGP	AB+PFA	4.22094	0.00244831	Up
Pseudoflavonifractor	D21	AGP	AB+PFA	16.9511	4.78004e-07	Up
Lactobacillus	D35	AGP	AB+PFA	-2.84007	0.0310633	Down
